# Supplementary material for: A visible-light-mediated cascade reaction of quinoxalin-2(1H)-ones, alkenes, and sulfinic acids
Source: Royal Society of Chemistry journal article supplement (doi:10.1039/d3ob00448a), 2023-01-01
Supplement: d3ob00448a1.pdf [file d3ob00448a1.pdf]

# Supporting Information

## Visible-Light-Mediated Cascade Reaction of Quinoxalin-2(1*H*)-ones, Alkenes and Sulfinic Acids

Sha Peng,<sup>a,b</sup> Long-Yong Xie,<sup>b</sup> and Luo Yang<sup>\*a</sup>

<sup>a</sup> *Key Laboratory for Green Organic Synthesis and Application of Hunan Province, College of Chemistry, Xiangtan University, Hunan, 411105, PR China;*

<sup>b</sup> *College of Chemistry and Bioengineering, Hunan University of Science and Engineering, Yongzhou 425100, China;*

*E-mail: yangluo@xtu.edu.cn*

### Table of Content

|                                                                    |            |
|--------------------------------------------------------------------|------------|
| <b>1. General information</b>                                      | <b>S2</b>  |
| <b>2. Experimental Section</b>                                     | <b>S2</b>  |
| <b>3. Characterization data of products</b>                        | <b>S7</b>  |
| <b>4. References</b>                                               | <b>S22</b> |
| <b>5. <sup>1</sup>H and <sup>13</sup>C NMR spectra of products</b> | <b>S23</b> |

## 1. General information

Unless otherwise specified, all reagents and solvents were obtained from commercial suppliers and used without further purification. Dry solvents (1,2-dichloroethane, acetonitrile, acetone, ethanol, ethyl acetate, *N,N*-dimethylformamide, dimethyl sulfoxide and tetrahydrofuran) were used as commercially available. Column chromatography was performed with silica gel (200-300 mesh) with petroleum ether and ethyl acetate as eluents. The light source conditions: 6 W blue LED (440-445 nm, WP-TEC-1020SL, made in WATTCAS, China), and maintaining a relatively constant temperature by regulating the condensed water. <sup>1</sup>H NMR spectra were recorded at 400 MHz and <sup>13</sup>C NMR spectra were recorded at 100 MHz by using a Bruker Avance 400 spectrometer. Chemical shifts were calibrated using residual undeuterated solvent as an internal reference (<sup>1</sup>H NMR: CDCl<sub>3</sub> 7.26 ppm, <sup>13</sup>C NMR: CDCl<sub>3</sub> 77.0 ppm). The following abbreviations were used to describe peak splitting patterns when appropriate: s = singlet, d = doublet, t = triplet, q = quartet, m = multiplet, brs = broad singlet. Mass spectra were performed on a spectrometer operating on ESI-TOF.

The Material of the Irradiation Vessel

Manufacturer: Xi'an WATTCAS experimental equipment co. LTD

Model: WP-TEC-1020SL

Broadband source:  $\lambda = 440-445$  nm

Emission spectrum (figure S1):

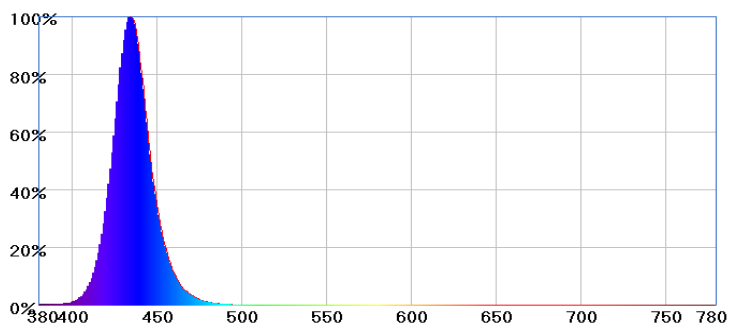

**Figure S1** The spectrum of our lamp (blue LED)

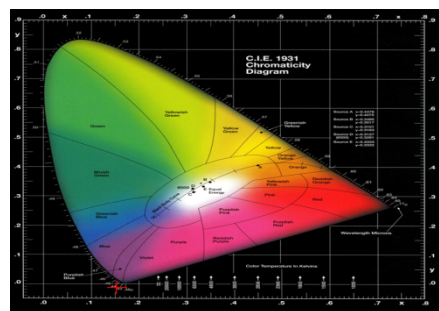

Material of the irradiation vessel: Borosilicate reaction tube

Distance from the light source to the irradiation vessel: 2.0 cm

Not use any filters

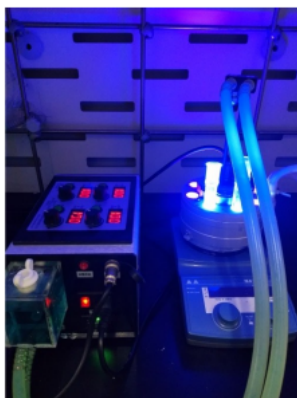

**Figure S2** (Photographed by author Sha Peng)

## 2. Experimental Section

### 2.1 General Procedure for Synthesis of Quinoxalin-2(1*H*)-ones

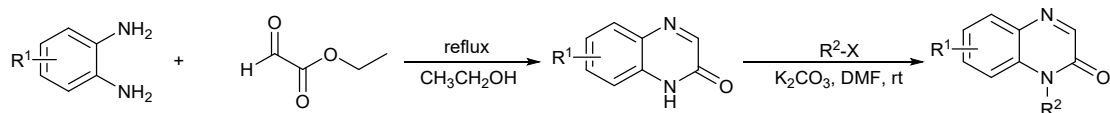

Quinoxalin-2(1*H*)-one was prepared from 1,2-phenylenediamines following the procedure of Cui and co-workers<sup>1</sup> on 5 mmol scale. Ethyl 2-oxoacetate (6mmol, 1.2 equiv.) was added to a suspension of *o*-arylenediamine (5 mmol, 1 equiv.) in ethanol (1 mol/L). The reaction mixture was stirred and heated at reflux in an oil bath for 1 h, then at room temperature for 16 h. Upon completion (as monitored by TLC), the precipitate was filtered and washed with ethanol, then dried to give quinoxalinone. For alkylation, the corresponding halogenoalkane (1.6 equiv.) was added to a suspension of quinoxalinone (1 equiv.) and potassium carbonate (1.2 equiv.) in DMF (16 mL). The mixture was stirred at room temperature for 16 h. Upon completion (as monitored by TLC), the reaction mixture was washed with saturated solution of ammonium chloride (NH<sub>4</sub>Cl, 5 mL), ethyl acetate (10 mL) and water (10 mL). The organic layer was separated and the aqueous layer was extracted with ethyl acetate (2 × 10 mL). The combined organic layers were dried with anhydrous Na<sub>2</sub>SO<sub>4</sub>, filtered and concentrated under reduced pressure. The resulting organic residue was purified by flash chromatography column over silica gel to afford the *N*-alkylated quinoxalinone.

### 2.2 General procedure for the preparation of sulfonated quinoxalin-2(1*H*)-ones (4 or 5)

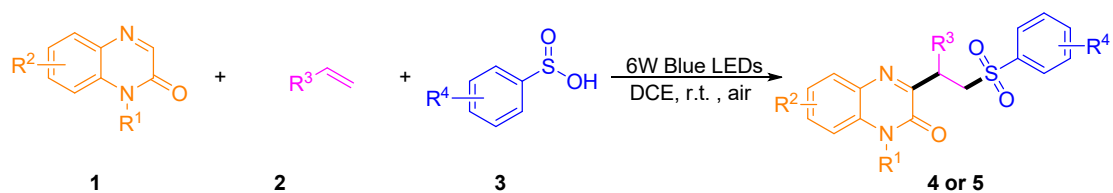

A 10mL of oven-dried quartz tube charged with a stir bar was added quinoxalin-2(1*H*)-one **1** (0.3 mmol), alkyne **2** (0.36 mmol, 1.2 eq) and sulfinic acid **3** (0.36 mmol, 1.2 eq) in DCE (3 mL). The reaction mixture was open to the air and stirred at room temperature under the irradiation of 6W blue LED lamps (440 – 445 nm) for 0.5 – 2 h. The reaction was monitored by TLC. After completion, H<sub>2</sub>O (5 mL) was added to the mixture, which was further extracted with EtOAc for three times (5 mL × 3). The organic phase was then dried with anhydrous sodium sulfate, concentrated under vacuum. The residue was purified by flash column chromatography using a mixture of petroleum ether and ethyl acetate as eluent to give the desired products **4** or **5**.

### 2.3 Mechanistic Investigations

#### (1) UV-vis Absorption spectra

The UV/Vis absorption spectra of 1-methylquinoxalin-2(1*H*)-one (**1a**, 0.020 M), styrene (**2a**, 0.020 M), 4-methylbenzenesulfinic acid (**3a**, 0.020 M) and the mixtures (**1a+3a**, **1a+2a+3a**) in CH<sub>3</sub>CN were recorded in 1 cm path quartz cuvettes by using a SHIMADZU UV-2600 UV-visible spectrophotometer, respectively. The obtained bands in UV/vis absorption spectra were shown in Figure S3.

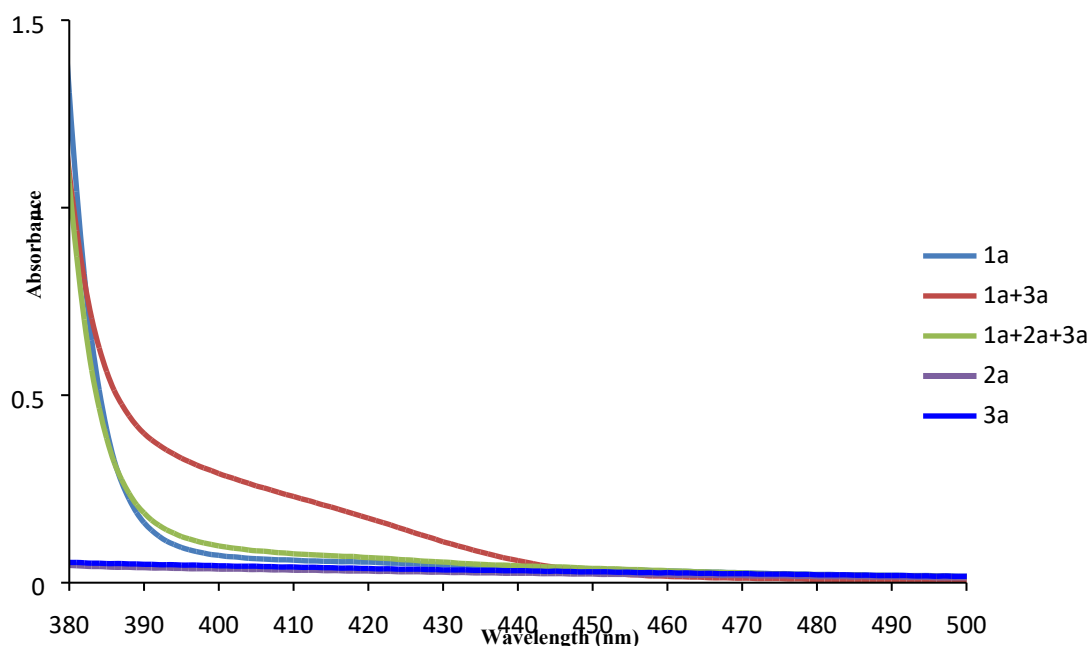

**Figure S3.** UV/vis absorption spectra of individual reaction components and a combination thereof.

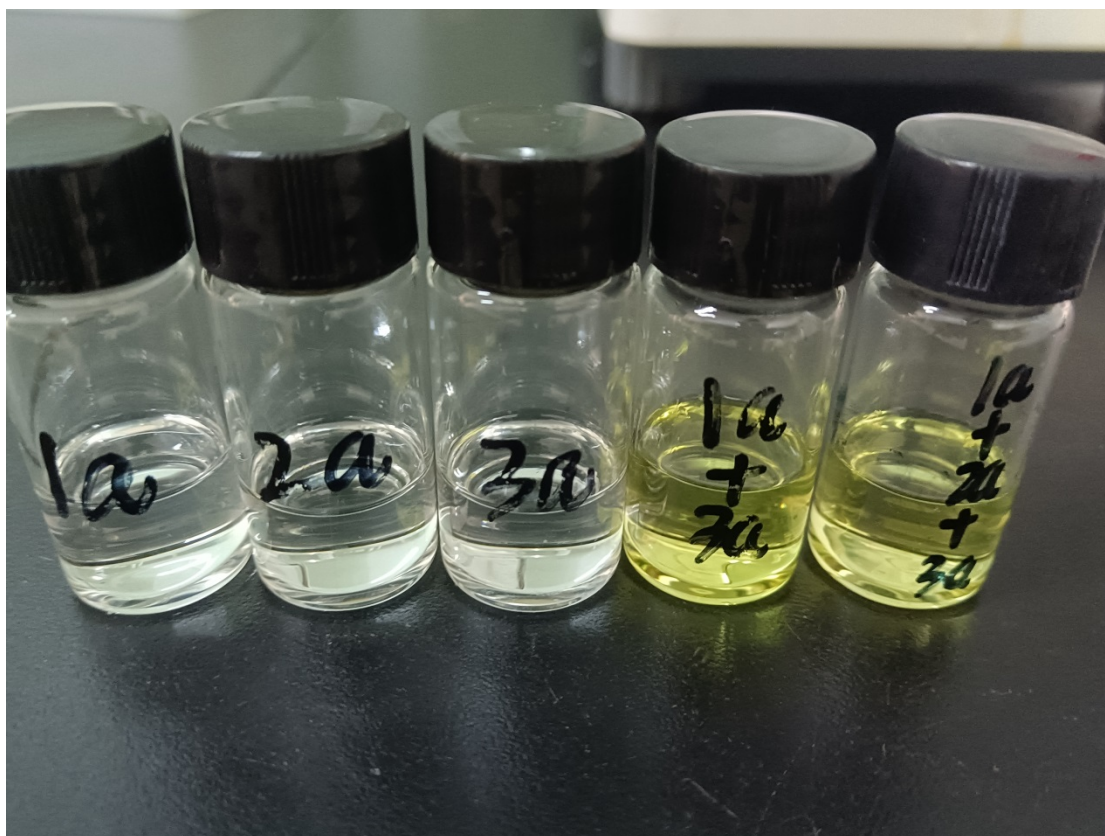

**Figure S4.** Visual appearance of reaction components and mixtures thereof.

## (2) Quantum Yield Measurements

### Determination of the light intensity at 438 nm

The photon flux of the spectrophotometer was determined by standard ferrioxalate, according to the procedure of Yoon.<sup>2</sup> A 0.15 M solution of ferrioxalate was prepared by dissolving potassium ferrioxalate hydrate (1.312 g) in H<sub>2</sub>SO<sub>4</sub> (20 mL of a 0.05 M solution). A buffered solution of 1,10-phenanthroline was prepared by dissolving 1,10-phenanthroline (50.0 mg) and sodium acetate (11.25 g) in H<sub>2</sub>SO<sub>4</sub> (50 mL of a 0.5 M solution). Both solutions were stored in the dark. To determine the photon flux of the LED, the ferrioxalate solution (2.0 mL) was placed in a cuvette and irradiated for 90 seconds at  $\lambda = 436$  nm with an emission slit width at 10.0 nm. After irradiation, the phenanthroline solution (0.35 mL) was added to the cuvette and the mixture was allowed to stir in the dark for 1 h to allow the ferrous ions to completely coordinate to the phenanthroline. The absorbance of the solution was measured at 510 nm. A nonirradiated sample was also prepared and the absorbance at 510 nm was measured. Conversion was calculated using eq 1.

|  |             |             |         |         |
|--|-------------|-------------|---------|---------|
|  | Non-irrad 1 | Non-irrad 2 | Irrad 1 | Irrad 2 |
|--|-------------|-------------|---------|---------|

|                           |       |       |       |       |
|---------------------------|-------|-------|-------|-------|
| A510nm                    | 0.186 | 0.188 | 0.897 | 0.949 |
| Average A510nm of samples | 0.187 |       | 0.923 |       |

$$\text{mol Fe}^{2+} = (V \times \Delta A) / (l \times \epsilon) \quad (1)$$

$$\text{mol Fe}^{2+} = [2.35 \times 10^{-3} \text{ L} \times (0.923 - 0.187)] / (1 \text{ cm} \times 11100 \text{ L mol}^{-1} \text{ cm}^{-1}) = 1.558 \times 10^{-7} \text{ mol}$$

Where V is the total volume (0.003525 L) of the solution after addition of phenanthroline,  $\Delta A$  is the difference in absorbance at 510 nm between the irradiated and non-irradiated solutions, l is the path length (1.00 cm), and  $\epsilon$  is the molar absorptivity of the ferrioxalate actinometer at 510 nm ( $11,100 \text{ L mol}^{-1} \text{ cm}^{-1}$ )<sup>3</sup>

$$\text{photo flux} = \text{mol Fe}^{2+} / (\Phi \times t \times f)$$

$$\text{photo flux} = 1.558 \times 10^{-7} / (1.01 \times 90 \times 0.9926) = 1.727 \times 10^{-9} \text{ einstein s}^{-1}$$

Where mol Fe<sup>2+</sup> is the mols of Fe<sup>2+</sup> formed during irradiation ( $1.558 \times 10^{-7}$  mol),  $\Phi$  is the quantum yield for the ferrioxalate actinometer (1.01 for a 0.15 M solution at  $\lambda = 438 \text{ nm}$ ),<sup>4</sup> t is the time (90.0 s), and f is the fraction of light absorbed of the ferrioxalate solution at  $\lambda = 436 \text{ nm}$ . The fraction of light absorbed ( $f_{\text{Fe}}$ ) by this solution was calculated using eq 2, where A is the measured absorbance at 436 nm.

$$F_{\text{Fe}} = 1 - 10^{-A} \quad (2)$$

An absorption spectrum gave the absorbance of ferrioxalate solution at 436nm is 2.131, thus,  $F_{\text{Fe}} = 1 - 10^{-A} = 1 - 10^{-2.131} = 0.9926$

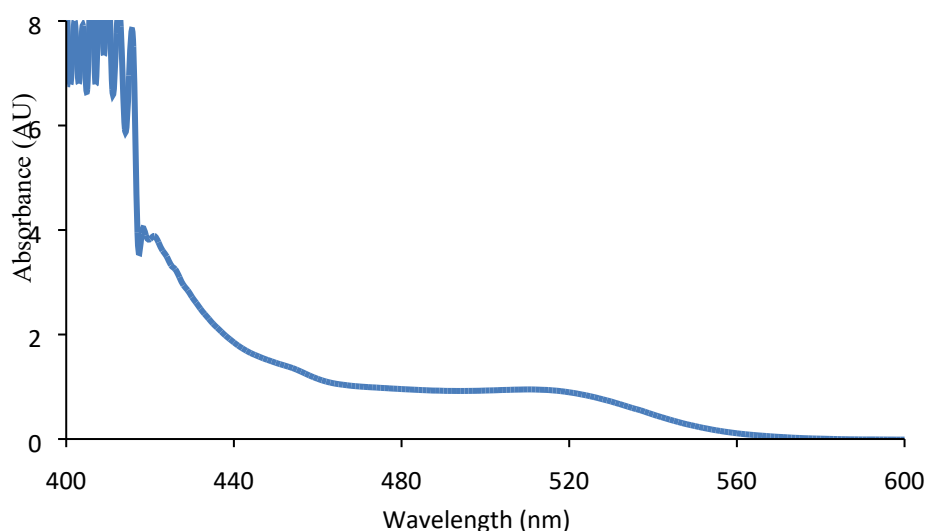

#### Determination of the reaction quantum yield

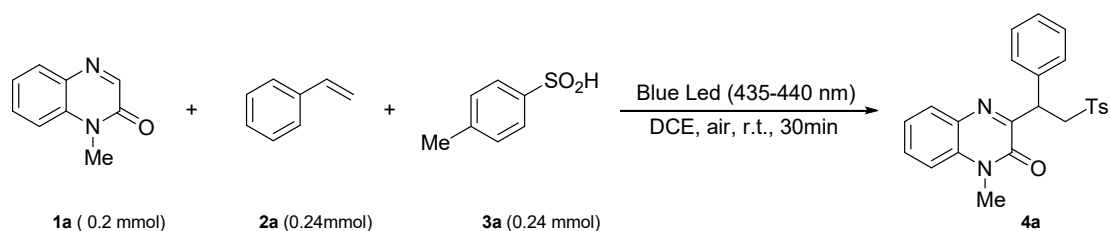

The reaction mixture was stirred and irradiated by blue LED ( $\lambda_{\text{max}} = 440$ ) for 30 min. The yield of product was determined by  $^1\text{H}$  NMR analysis using 1,3,5-Trimethoxybenzene as an internal standard. The yield of **4aa** was determined to be 32% ( $0.064 \times 10^{-3}$  mol of **4a**). The reaction quantum yield ( $\Phi$ ) was determined using eq 4 where the photon flux is  $4.52 \times 10^{-9}$  einsteins  $\text{s}^{-1}$  (determined by actinometry as described above),  $t$  is the reaction time ( $30 \times 60 = 1800$  s) and  $f$  is the fraction of incident light absorbed by the catalyst, determined using eq 2.

$$\text{Quantum Yield} = \text{moles of product formed} / (\text{flux} \times f \times t) \quad (3)$$

$$= 0.064 \times 10^{-3} \text{ mol} / (1.727 \times 10^{-9} \times 0.9926 \times 1800)$$

$$= 20.7$$

### 3. Characterization data of products

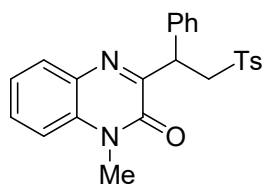

**1-methyl-3-(1-phenyl-2-tosylethyl)quinolin-2(1H)-one (4a)**: White solid, mp 152-154°C, 102.8 mg, 82% yield.  $R_f = 0.35$  (petroleum ether/ethyl acetate = 3:1).  $^1\text{H}$  NMR (400 MHz,  $\text{CDCl}_3$ )  $\delta$  7.74 (d,  $J = 7.9$  Hz, 1H), 7.68 (d,  $J = 8.0$  Hz, 2 H), 7.50 (t,  $J = 7.8$  Hz, 1 H), 7.32 (t,  $J = 8.6$  Hz, 3 H), 7.25 – 7.12 (m, 4 H), 7.06 (d,  $J = 8.0$  Hz, 2 H), 5.26 (dd,  $J = 10.2, 2.8$  Hz, 1 H), 4.77 (dd,  $J = 14.2, 10.4$  Hz, 1 H), 3.62 – 3.53 (m, 4 H), 2.17 (s, 3 H);  $^{13}\text{C}$  NMR (100 MHz,  $\text{CDCl}_3$ )  $\delta$  157.3, 153.8, 144.2, 138.5, 136.3, 132.9, 132.1, 130.2, 130.0, 129.4, 128.7, 128.3, 128.3, 127.4, 123.5, 113.4, 59.3, 42.1, 29.0, 21.3. The compound spectra data is in accord with the previous literature.<sup>5</sup>

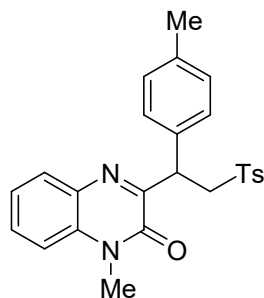

**1-methyl-3-(1-(p-tolyl)-2-tosylethyl)quinoxalin-2(1H)-one (4b):** White solid, mp 139-141°C, 99.8 mg, 77% yield.  $R_f = 0.35$  (petroleum ether/ethyl acetate = 3:1).  $^1\text{H NMR}$  (400 MHz,  $\text{CDCl}_3$ )  $\delta$  7.72 (dd,  $J = 8.0, 1.5$  Hz, 1 H), 7.69 – 7.64 (m, 2 H), 7.47 (ddd,  $J = 8.6, 7.2, 1.5$  Hz, 1 H), 7.30 (ddd,  $J = 8.2, 7.4, 1.2$  Hz, 1 H), 7.24 – 7.15 (m, 3 H), 7.06 – 6.99 (m, 4 H), 5.22 (dd,  $J = 10.2, 3.2$  Hz, 1 H), 4.75 (dd,  $J = 14.3, 10.3$  Hz, 1 H), 3.58 (dd,  $J = 14.3, 3.2$  Hz, 1 H), 3.54 (s, 3 H), 2.23 (s, 3 H), 2.15 (s, 3 H);  $^{13}\text{C NMR}$  (100 MHz,  $\text{CDCl}_3$ )  $\delta$  157.3, 153.7, 144.1, 137.1, 136.1, 135.4, 132.8, 131.9, 130.1, 129.8, 129.3, 129.2, 128.2, 128.0, 123.4, 113.3, 59.2, 41.6, 28.9, 21.3, 20.9. The compound spectra data is in accord with the previous literature.<sup>6</sup>

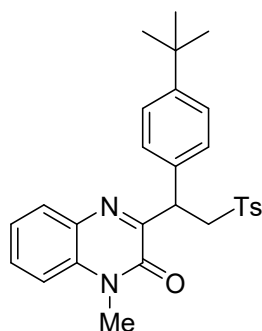

**3-(1-(4-(tert-butyl)phenyl)-2-tosylethyl)-1-methylquinoxalin-2(1H)-one (4c):** White solid, mp 160-162°C, 105.2 mg, 74% yield.  $R_f = 0.34$  (petroleum ether/ethyl acetate = 3:1).  $^1\text{H NMR}$  (400 MHz,  $\text{CDCl}_3$ )  $\delta$  7.71 (dd,  $J = 8.0, 1.4$  Hz, 1 H), 7.64 (d,  $J = 8.3$  Hz, 2 H), 7.48 – 7.42 (m, 1 H), 7.30 – 7.19 (m, 5 H), 7.15 (d,  $J = 7.6$  Hz, 1 H), 7.02 (d,  $J = 8.1$  Hz, 2 H), 5.23 (dd,  $J = 10.3, 3.1$  Hz, 1 H), 4.75 (dd,  $J = 14.3, 10.3$  Hz, 1 H), 3.60 (dd,  $J = 14.3, 3.2$  Hz, 1 H), 3.53 (s, 3 H), 2.13 (s, 3 H), 1.20 (s, 9 H);  $^{13}\text{C NMR}$  (100 MHz,  $\text{CDCl}_3$ )  $\delta$  157.3, 153.7, 150.2, 144.0, 136.1, 135.2, 132.7, 130.0, 129.8, 129.2, 128.2, 127.8, 125.5, 123.4, 113.3, 59.2, 41.5, 34.3, 31.1, 28.9, 21.3. The compound spectra data is in accord with the previous literature.<sup>5</sup>

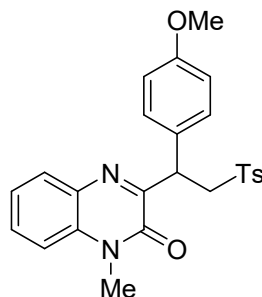

**3-(1-(4-methoxyphenyl)-2-tosylethyl)-1-methylquinoxalin-2(1H)-one (4d):** Colorless oil, 96.8 mg, 72% yield.  $R_f = 0.41$  (petroleum ether/ethyl acetate = 2:1).  $^1\text{H NMR}$  (400 MHz,  $\text{CDCl}_3$ )  $\delta$  7.70 (dd,  $J = 8.0, 1.4$  Hz, 1 H), 7.53 – 7.43 (m, 3 H), 7.29 – 7.24 (m, 1 H), 7.23 – 7.12 (m, 5 H), 6.72 (d,  $J = 8.7$  Hz,



2 H), 5.22 (dd,  $J = 9.6, 5.3$  Hz, 1 H), 3.88 (dd,  $J = 16.7, 5.2$  Hz, 1 H), 3.78 – 3.70 (m, 4 H), 3.59 (s, 3 H);  $^{13}\text{C}$  NMR (100 MHz, )  $\delta$  159.8, 155.9, 154.5, 144.4, 134.3, 132.9, 132.4, 131.5, 130.1, 129.8, 129.4, 129.3, 123.6, 113.7, 113.6, 60.4, 55.2, 32.9, 29.1, 21.6. The compound spectra data is in accord with the previous literature.<sup>6</sup>

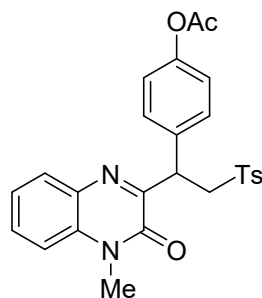

**4-(1-(4-methyl-3-oxo-3,4-dihydroquinoxalin-2-yl)-2-tosylethyl)phenyl acetate (4e):** White solid, mp 169-171°C, 92.8 mg, 65% yield.  $R_f = 0.37$  (petroleum ether/ethyl acetate = 2:1).  $^1\text{H}$  NMR (400 MHz, )  $\delta$  7.73 (dd,  $J = 8.0, 1.4$  Hz, 1 H), 7.67 (d,  $J = 8.2$  Hz, 2 H), 7.54 – 7.48 (m, 1 H), 7.36 – 7.30 (m, 3 H), 7.21 (d,  $J = 8.3$  Hz, 1 H), 7.07 (d,  $J = 8.2$  Hz, 2 H), 6.92 (d,  $J = 8.6$  Hz, 2 H), 5.27 (dd,  $J = 10.3, 3.1$  Hz, 1 H), 4.75 (dd,  $J = 14.3, 10.3$  Hz, 1 H), 3.62 – 3.56 (m, 4 H), 2.24 (s, 3 H), 2.17 (s, 3 H);  $^{13}\text{C}$  NMR (100 MHz,  $\text{CDCl}_3$ )  $\delta$  169.4, 157.0, 153.8, 149.8, 144.3, 136.0, 135.9, 132.8, 132.0, 130.3, 129.9, 129.4, 129.3, 128.3, 123.6, 121.8, 113.4, 59.1, 41.4, 29.1, 21.3, 21.1; HRMS (ESI):  $m/z$   $[\text{M}+\text{H}]^+$  calcd for  $\text{C}_{26}\text{H}_{25}\text{N}_2\text{O}_5\text{S}$ : 477.1479; found: 477.1477.

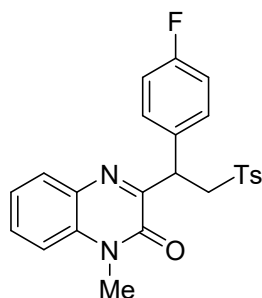

**3-(1-(4-fluorophenyl)-2-tosylethyl)-1-methylquinoxalin-2(1H)-one (4f):** White solid, mp 125-126°C, 98.1 mg, 75% yield.  $R_f = 0.34$  (petroleum ether/ethyl acetate = 3:1).  $^1\text{H}$  NMR (400 MHz,  $\text{CDCl}_3$ )  $\delta$  7.70 (dd,  $J = 8.0, 1.5$  Hz, 1 H), 7.63 (d,  $J = 8.2$  Hz, 2 H), 7.51 – 7.45 (m, 1 H), 7.34 – 7.27 (m, 3 H), 7.18 (d,  $J = 8.3$  Hz, 1 H), 7.03 (d,  $J = 8.3$  Hz, 2 H), 6.87 (t,  $J = 8.7$  Hz, 2 H), 5.24 (dd,  $J = 9.8, 3.7$  Hz, 1 H), 4.67 (dd,  $J = 14.3, 9.8$  Hz, 1 H), 3.58 (dd,  $J = 14.3, 3.7$  Hz, 1 H), 3.54 (s, 3 H), 2.14 (s, 3 H);  $^{13}\text{C}$  NMR (100 MHz,  $\text{CDCl}_3$ )  $\delta$  161.9 (d,  $J_{\text{C-F}} = 245.0$  Hz), 157.0, 153.6, 144.2, 136.0, 134.0 (d,  $J_{\text{C-F}} = 4.0$  Hz), 132.7, 130.3, 129.9, 129.8, 129.8, 129.3, 128.1, 123.5, 115.4 (d,  $J_{\text{C-F}} = 21.0$  Hz), 113.4, 59.2, 41.3, 29.0, 21.2;  $^{19}\text{F}$  NMR (376 MHz,  $\text{CDCl}_3$ )  $\delta$  -114.73. The compound spectra data is in accord with the previous literature.<sup>6</sup>

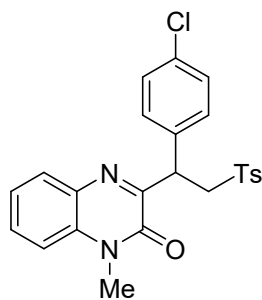

**3-(1-(4-chlorophenyl)-2-tosylethyl)-1-methylquinoxalin-2(1H)-one (4g):** White solid, mp 165-167°C, 112.5 mg, 83% yield.  $R_f = 0.34$  (petroleum ether/ethyl acetate = 3:1).  $^1\text{H NMR}$  (400 MHz,  $\text{CDCl}_3$ )  $\delta$  7.71 (dd,  $J = 8.0, 1.4$  Hz, 1 H), 7.62 (d,  $J = 8.3$  Hz, 2 H), 7.52 – 7.46 (m, 1 H), 7.36 – 7.29 (m, 1 H), 7.25 (d,  $J = 8.6$  Hz, 2 H), 7.19 (d,  $J = 8.4$  Hz, 1 H), 7.17 – 7.11 (m, 2 H), 7.03 (d,  $J = 8.2$  Hz, 2 H), 5.21 (dd,  $J = 9.5, 4.0$  Hz, 1 H), 4.63 (dd,  $J = 14.4, 9.5$  Hz, 1 H), 3.60 (dd,  $J = 14.4, 4.0$  Hz, 1 H), 3.54 (s, 3 H), 2.15 (s, 3 H);  $^{13}\text{C NMR}$  (100 MHz,  $\text{CDCl}_3$ )  $\delta$  156.8, 153.6, 144.3, 136.7, 136.0, 133.3, 132.8, 131.9, 130.3, 129.9, 129.6, 129.3, 128.7, 128.1, 123.5, 113.4, 59.0, 41.5, 29.0, 21.3. The compound spectra data is in accord with the previous literature.<sup>6</sup>

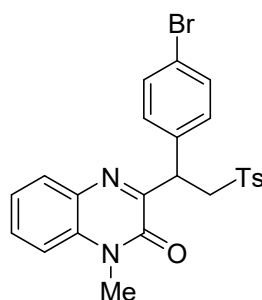

**3-(1-(4-bromophenyl)-2-tosylethyl)-1-methylquinoxalin-2(1H)-one (4h):** White solid, mp 164-166°C, 122.0 mg, 82% yield.  $R_f = 0.35$  (petroleum ether/ethyl acetate = 3:1).  $^1\text{H NMR}$  (400 MHz,  $\text{CDCl}_3$ )  $\delta$  7.72 (d,  $J = 7.9$  Hz, 1 H), 7.62 (d,  $J = 8.1$  Hz, 2 H), 7.50 (t,  $J = 7.8$  Hz, 1 H), 7.34 – 7.27 (m, 3 H), 7.23 – 7.17 (m, 3 H), 7.05 (d,  $J = 8.0$  Hz, 2 H), 5.21 (dd,  $J = 9.4, 4.0$  Hz, 1 H), 4.63 (dd,  $J = 14.4, 9.4$  Hz, 1 H), 3.62 (dd,  $J = 14.4, 4.1$  Hz, 1 H), 3.55 (s, 3 H), 2.17 (s, 3 H);  $^{13}\text{C NMR}$  (100 MHz,  $\text{CDCl}_3$ )  $\delta$  156.7, 153.6, 144.3, 137.2, 136.0, 132.8, 131.9, 131.7, 130.4, 130.0, 129.9, 129.4, 128.1, 123.6, 121.5, 113.4, 58.9, 41.6, 29.0, 21.3. The compound spectra data is in accord with the previous literature.<sup>6</sup>

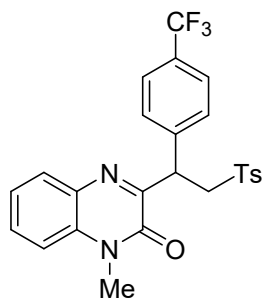

**1-methyl-3-(2-tosyl-1-(4-(trifluoromethyl)phenyl)ethyl)quinoxalin-2(1H)-one (4i):** White solid, mp 151-153°C, 113.7 mg, 78% yield.  $R_f = 0.35$  (petroleum ether/ethyl acetate = 3:1).  $^1\text{H NMR}$  (400 MHz,  $\text{CDCl}_3$ )  $\delta$  7.76 (dd,  $J = 8.0, 1.3$  Hz, 1 H), 7.63 (d,  $J = 8.2$  Hz, 2 H), 7.56 – 7.50 (m, 1 H), 7.48 – 7.40 (m, 4 H), 7.34 (t,  $J = 7.2$  Hz, 1 H), 7.22 (d,  $J = 8.3$  Hz, 1 H), 7.05 (d,  $J = 8.1$  Hz, 2 H), 5.37 – 5.30 (m, 1 H), 4.63 (dd,  $J = 14.4, 9.0$  Hz, 1 H), 3.69 (dd,  $J = 14.4, 4.6$  Hz, 1 H), 3.57 (s, 3 H), 2.18 (s, 3 H);  $^{13}\text{C NMR}$  (100 MHz,  $\text{CDCl}_3$ )  $\delta$  156.6, 153.7, 144.4, 142.1, 136.0, 132.9, 130.6, 130.0, 129.6 (q,  $J_{\text{C-F}} = 32.0$  Hz), 129.4, 128.8, 128.2, 125.5 (q,  $J_{\text{C-F}} = 4.0$  Hz), 123.9 (q,  $J_{\text{C-F}} = 270.0$  Hz), 123.7, 122.5, 113.5, 58.9, 42.1, 29.1, 21.3;  $^{19}\text{F NMR}$  (376 MHz, Chloroform-*d*)  $\delta$  -62.63. The compound spectra data is in accord with the previous literature.<sup>6</sup>

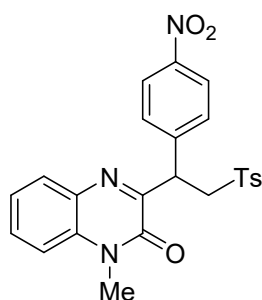

**1-methyl-3-(1-(4-nitrophenyl)-2-tosylethyl)quinoxalin-2(1H)-one (4j):** Yellow solid, mp 177-179°C, 100.0 mg, 72% yield.  $R_f = 0.32$  (petroleum ether/ethyl acetate = 3:1).  $^1\text{H NMR}$  (400 MHz,  $\text{CDCl}_3$ )  $\delta$  8.13 – 8.05 (m, 2 H), 7.80 (dd,  $J = 8.0, 1.4$  Hz, 1 H), 7.68 (d,  $J = 8.3$  Hz, 2 H), 7.60 – 7.52 (m, 3 H), 7.39 (t,  $J = 7.7$  Hz, 1 H), 7.29 – 7.27 (m, 1 H), 7.12 (d,  $J = 8.1$  Hz, 2 H), 5.39 (dd,  $J = 8.9, 4.6$  Hz, 1 H), 4.66 (dd,  $J = 14.4, 8.9$  Hz, 1 H), 3.70 (dd,  $J = 14.5, 4.7$  Hz, 1 H), 3.61 (s, 3 H), 2.24 (s, 3 H);  $^{13}\text{C NMR}$  (100 MHz,  $\text{CDCl}_3$ )  $\delta$  156.1, 153.7, 147.1, 145.6, 144.7, 136.0, 132.9, 132.0, 130.8, 130.1, 129.6, 128.2, 123.9, 123.8, 113.6, 58.8, 42.1, 29.2, 21.4. The compound spectra data is in accord with the previous literature.<sup>6</sup>

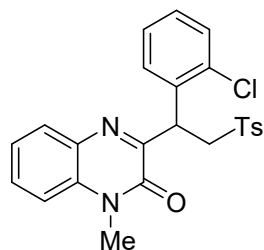

**3-(1-(2-chlorophenyl)-2-tosylethyl)-1-methylquinoxalin-2(1H)-one (4k):** White solid, mp 142-144°C, 105.7 mg, 78% yield.  $R_f = 0.35$  (petroleum ether/ethyl acetate = 3:1).  $^1\text{H NMR}$  (400 MHz,  $\text{CDCl}_3$ )  $\delta$  7.82 (dd,  $J = 8.0, 1.4$  Hz, 1 H), 7.76 (d,  $J = 8.3$  Hz, 2 H), 7.55 (td,  $J = 8.0, 7.4, 1.5$  Hz, 1 H), 7.38 – 7.32 (m, 2 H), 7.26 (d,  $J = 8.2$  Hz, 1 H), 7.18 – 7.01 (m, 5 H), 5.74 (dd,  $J = 10.6, 2.5$  Hz, 1 H), 4.69 (dd,  $J = 14.4, 10.6$  Hz, 1 H), 3.61 (s, 3 H), 3.43 (dd,  $J = 14.4, 2.5$  Hz, 1 H), 2.24 (s, 3 H);  $^{13}\text{C NMR}$  (100 MHz,  $\text{CDCl}_3$ )  $\delta$  156.5, 153.9, 144.3, 136.1, 135.9, 134.1, 133.0, 131.9, 130.5, 130.2, 130.1, 129.5, 128.8, 128.7, 128.5, 126.8, 123.6, 113.5, 58.3, 38.5, 29.1, 21.4; HRMS (ESI):  $m/z$   $[\text{M}+\text{H}]^+$  calcd for  $\text{C}_{24}\text{H}_{22}\text{ClN}_2\text{O}_3\text{S}$ : 453.1034; found: 453.1031.

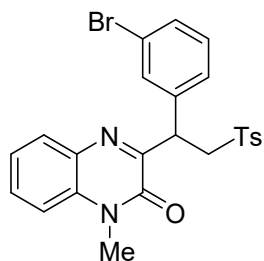

**3-(1-(3-bromophenyl)-2-tosylethyl)-1-methylquinoxalin-2(1H)-one (4l):** White solid, mp 158-160°C, 122.0 mg, 82% yield.  $R_f = 0.35$  (petroleum ether/ethyl acetate = 3:1).  $^1\text{H NMR}$  (400 MHz,  $\text{CDCl}_3$ )  $\delta$  7.75 (dd,  $J = 8.0, 1.4$  Hz, 1 H), 7.64 (d,  $J = 8.2$  Hz, 2 H), 7.54 – 7.48 (m, 1 H), 7.40 – 7.27 (m, 4 H), 7.21 (d,  $J = 8.3$  Hz, 1 H), 7.12 – 7.03 (m, 3 H), 5.21 (dd,  $J = 9.5, 3.9$  Hz, 1 H), 4.64 (dd,  $J = 14.4, 9.5$  Hz, 1 H), 3.61 (dd,  $J = 14.4, 3.9$  Hz, 1 H), 3.57 (s, 3 H), 2.19 (s, 3 H);  $^{13}\text{C NMR}$  (100 MHz,  $\text{CDCl}_3$ )  $\delta$  156.7, 153.7, 140.5, 136.0, 132.9, 131.9, 131.1, 131.0, 130.6, 130.4, 130.2, 130.0, 129.4, 128.2, 127.2, 123.6, 122.6, 113.5, 59.0, 41.8, 29.1, 21.4. The compound spectra data is in accord with the previous literature.<sup>6</sup>

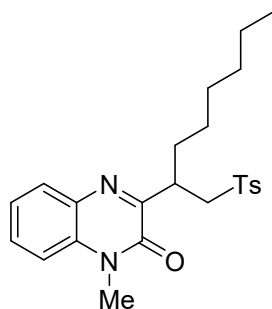

**1-methyl-3-(1-tosyloctan-2-yl)quinoxalin-2(1H)-one (4m):** Colorless oil, 103.5 mg, 81% yield.  $R_f =$

0.42 (petroleum ether/ethyl acetate = 4:1).  $^1\text{H}$  NMR (400 MHz,  $\text{CDCl}_3$ )  $\delta$  7.71 (dd,  $J = 8.0, 1.3$  Hz, 1 H), 7.65 (d,  $J = 8.2$  Hz, 2 H), 7.54 – 7.48 (m, 1 H), 7.35 – 7.29 (m, 1 H), 7.23 (d,  $J = 8.3$  Hz, 1 H), 7.05 (d,  $J = 8.1$  Hz, 2 H), 4.29 (dd,  $J = 14.4, 10.6$  Hz, 1 H), 3.97 – 3.87 (m, 1 H), 3.61 (s, 3 H), 3.33 (dd,  $J = 14.4, 2.4$  Hz, 1 H), 2.18 (s, 3 H), 1.79 – 1.67 (m, 1 H), 1.61 – 1.50 (m, 1 H), 1.27 – 1.06 (m, 8 H), 0.81 (t,  $J = 6.9$  Hz, 3 H);  $^{13}\text{C}$  NMR (100 MHz,  $\text{CDCl}_3$ )  $\delta$  159.6, 154.1, 144.0, 136.1, 132.8, 132.2, 130.0, 129.8, 129.3, 128.4, 123.5, 113.3, 58.0, 37.3, 33.9, 31.5, 29.0, 28.9, 26.6, 22.5, 21.4, 14.0. The compound spectra data is in accord with the previous literature.<sup>6</sup>

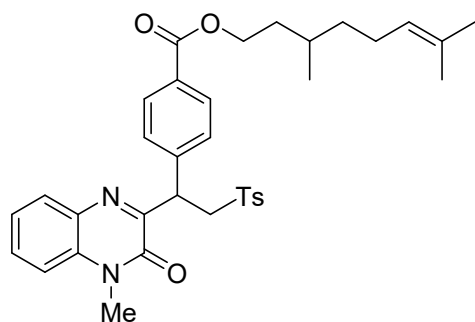

**3,7-dimethyloct-6-en-1-yl 4-(1-(4-methyl-3-oxo-3,4-dihydroquinoxalin-2-yl)-2-tosylethyl)benzoate (4n):** White solid, mp 174-176°C, 104.4 mg, 58% yield.  $R_f = 0.28$  (petroleum ether/ethyl acetate = 2:1).  $^1\text{H}$  NMR (400 MHz,  $\text{CDCl}_3$ )  $\delta$  7.86 (d,  $J = 8.3$  Hz, 2 H), 7.74 (d,  $J = 8.0$  Hz, 1 H), 7.65 (d,  $J = 8.2$  Hz, 2 H), 7.51 (t,  $J = 7.8$  Hz, 1 H), 7.39 (d,  $J = 8.3$  Hz, 2 H), 7.35 – 7.30 (m, 1 H), 7.20 (d,  $J = 8.4$  Hz, 1 H), 7.05 (d,  $J = 8.1$  Hz, 2 H), 5.30 (dd,  $J = 9.6, 3.7$  Hz, 1 H), 4.71 (dd,  $J = 14.4, 9.7$  Hz, 1 H), 4.34 – 4.25 (m, 2 H), 3.62 (dd,  $J = 14.2, 3.9$  Hz, 1 H), 3.56 (s, 3 H), 2.17 (s, 3 H), 2.02 – 1.90 (m, 2 H), 1.82 – 1.44 (m, 9 H), 1.42 – 1.06 (m, 3 H), 0.94 – 0.88 (m, 3 H);  $^{13}\text{C}$  NMR (100 MHz,  $\text{CDCl}_3$ )  $\delta$  166.1, 156.6, 153.7, 150.0, 144.4, 143.3, 136.0, 132.8, 131.9, 131.3, 130.4, 129.9, 129.4, 128.3, 128.2, 124.4, 123.6, 113.4, 63.4, 58.9, 42.1, 36.9, 29.4, 29.1, 25.6, 25.3, 21.3, 19.4, 17.6; HRMS (ESI):  $m/z$   $[\text{M}+\text{H}]^+$  calcd for  $\text{C}_{35}\text{H}_{41}\text{N}_2\text{O}_5\text{S}$ : 601.2731; found: 601.2726.

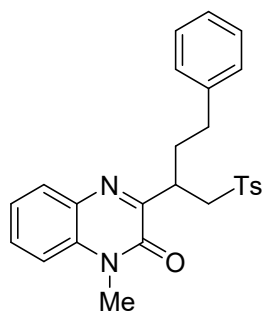

**1-methyl-3-(4-phenyl-1-tosylbutan-2-yl)quinoxalin-2(1H)-one (4o):** White solid, mp 122-124°C, 101.7 mg, 76% yield.  $R_f = 0.42$  (petroleum ether/ethyl acetate = 3:1).  $^1\text{H}$  NMR (400 MHz,  $\text{CDCl}_3$ )  $\delta$  7.73 (dd,  $J = 8.0, 1.3$  Hz, 1 H), 7.65 (d,  $J = 8.2$  Hz, 2 H), 7.56 – 7.50 (m, 1 H), 7.37 – 7.30 (m, 1 H), 7.22 (d,  $J = 8.3$  Hz, 1 H), 7.16 (t,  $J = 7.3$  Hz, 2 H), 7.11 – 7.01 (m, 5 H), 4.29 (dd,  $J = 14.3, 10.3$  Hz, 1

H), 4.08 – 3.96 (m, 1 H), 3.59 (s, 3 H), 3.39 (dd,  $J = 14.4, 2.9$  Hz, 1 H), 2.70 – 2.58 (m, 1 H), 2.53 – 2.43 (m, 1 H), 2.21 (s, 3 H), 2.19 – 2.08 (m, 1 H), 2.01 – 1.90 (m, 1 H);  $^{13}\text{C}$  NMR (100 MHz,  $\text{CDCl}_3$ )  $\delta$  159.2, 154.1, 144.1, 140.9, 136.1, 132.9, 132.2, 130.1, 129.9, 129.3, 128.4, 128.3, 128.2, 125.8, 123.5, 113.3, 58.2, 37.6, 35.3, 33.0, 29.0, 21.4. The compound spectra data is in accord with the previous literature.<sup>6</sup>

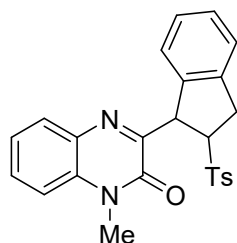

**1-methyl-3-(2-tosyl-2,3-dihydro-1H-inden-1-yl)quinoxalin-2(1H)-one (4p):** White solid, mp 194–196°C, 81.3 mg, 63% yield.  $R_f = 0.27$  (petroleum ether/ethyl acetate = 3:1).  $^1\text{H}$  NMR (400 MHz,  $\text{CDCl}_3$ )  $\delta$  7.73 (d,  $J = 8.2$  Hz, 2 H), 7.65 (dd,  $J = 8.0, 1.4$  Hz, 1 H), 7.55 – 7.49 (m, 1 H), 7.33 – 7.28 (m, 1 H), 7.26 – 7.19 (m, 2 H), 7.18 – 7.12 (m, 1 H), 7.08 – 7.01 (m, 4 H), 5.54 (d,  $J = 7.9$  Hz, 1 H), 5.16 – 5.04 (m, 1 H), 3.67 (s, 3 H), 3.60 (td,  $J = 15.4, 8.7$  Hz, 2 H), 2.11 (s, 3 H);  $^{13}\text{C}$  NMR (100 MHz,  $\text{CDCl}_3$ )  $\delta$  157.9, 154.5, 144.3, 141.2, 139.6, 135.0, 132.9, 132.1, 130.3, 129.9, 129.4, 128.8, 127.7, 127.2, 124.6, 124.2, 123.6, 113.4, 66.5, 49.6, 32.4, 29.2, 21.3. The compound spectra data is in accord with the previous literature.<sup>6</sup>

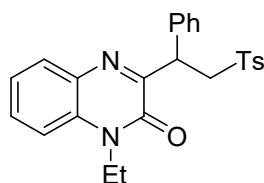

**1-ethyl-3-(1-phenyl-2-tosylethyl)quinoxalin-2(1H)-one (5a):** White solid, mp 133–135°C, 103.7 mg, 80% yield.  $R_f = 0.38$  (petroleum ether/ethyl acetate = 3:1).  $^1\text{H}$  NMR (400 MHz,  $\text{CDCl}_3$ )  $\delta$  7.71 (dd,  $J = 8.0, 1.5$  Hz, 1 H), 7.65 (d,  $J = 8.3$  Hz, 2 H), 7.47 (ddd,  $J = 8.6, 7.4, 1.5$  Hz, 1 H), 7.36 – 7.32 (m, 2 H), 7.31 – 7.26 (m, 1 H), 7.21 (t,  $J = 7.3$  Hz, 3 H), 7.18 – 7.12 (m, 1 H), 7.00 (d,  $J = 8.1$  Hz, 2 H), 5.27 (dd,  $J = 10.4, 3.0$  Hz, 1 H), 4.78 (dd,  $J = 14.3, 10.4$  Hz, 1 H), 4.21 (dq,  $J = 14.3, 7.2$  Hz, 1 H), 4.12 – 4.07 (m, 1 H), 3.57 (dd,  $J = 14.3, 3.0$  Hz, 1 H), 2.10 (s, 3 H), 1.29 (t,  $J = 7.2$  Hz, 3 H);  $^{13}\text{C}$  NMR (100 MHz,  $\text{CDCl}_3$ )  $\delta$  157.0, 153.1, 144.1, 138.5, 136.0, 132.2, 131.6, 130.1, 130.1, 129.4, 128.6, 128.2, 128.2, 127.3, 123.2, 113.1, 59.2, 41.9, 37.3, 21.2, 12.1. The compound spectra data is in accord with the previous literature.<sup>7</sup>

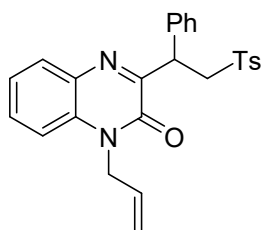

**1-allyl-3-(1-phenyl-2-tosylethyl)quinoxalin-2(1H)-one (5b):** White solid, mp 166-168°C, 90.6 mg, 68% yield.  $R_f = 0.33$  (petroleum ether/ethyl acetate = 3:1).  $^1\text{H NMR}$  (400 MHz,  $\text{CDCl}_3$ )  $\delta$  7.73 (dd,  $J = 8.0, 1.5$  Hz, 1 H), 7.68 (d,  $J = 8.2$  Hz, 2 H), 7.49 – 7.43 (m, 1 H), 7.35 – 7.29 (m, 3 H), 7.24 – 7.16 (m, 4 H), 7.05 (d,  $J = 8.2$  Hz, 2 H), 5.92 – 5.79 (m, 1 H), 5.26 (td,  $J = 7.2, 3.5$  Hz, 2 H), 5.15 (d,  $J = 17.3$  Hz, 1 H), 4.92 – 4.73 (m, 2 H), 4.67 (dd,  $J = 16.0, 5.3$  Hz, 1 H), 3.59 (dd,  $J = 14.4, 3.1$  Hz, 1 H), 2.14 (s, 3 H);  $^{13}\text{C NMR}$  (100 MHz,  $\text{CDCl}_3$ )  $\delta$  157.2, 153.4, 144.2, 138.5, 136.1, 132.1, 132.0, 130.3, 130.0, 129.5, 128.7, 128.3, 128.2, 127.4, 125.6, 123.4, 118.4, 113.9, 59.3, 44.6, 42.0, 21.3; HRMS (ESI):  $m/z$   $[\text{M}+\text{H}]^+$  calcd for  $\text{C}_{26}\text{H}_{25}\text{N}_2\text{O}_3\text{S}$ : 445.1580; found: 445.1586.

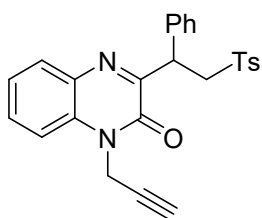

**3-(1-phenyl-2-tosylethyl)-1-(prop-2-yn-1-yl)quinoxalin-2(1H)-one (5c):** White solid, mp 172-174°C, 83.5 mg, 63% yield.  $R_f = 0.32$  (petroleum ether/ethyl acetate = 3:1).  $^1\text{H NMR}$  (400 MHz,  $\text{CDCl}_3$ )  $\delta$  7.71 – 7.63 (m, 3 H), 7.53 – 7.48 (m, 1 H), 7.38 – 7.30 (m, 4 H), 7.25 – 7.13 (m, 3 H), 7.05 – 6.98 (m, 2 H), 5.28 (dd,  $J = 10.5, 2.7$  Hz, 1 H), 5.10 (dd,  $J = 17.4, 2.5$  Hz, 1 H), 4.80 – 4.64 (m, 2 H), 3.55 (dd,  $J = 14.3, 2.8$  Hz, 1 H), 2.34 (t,  $J = 2.5$  Hz, 1 H), 2.04 (s, 3 H);  $^{13}\text{C NMR}$  (100 MHz,  $\text{CDCl}_3$ )  $\delta$  156.9, 152.7, 144.3, 138.3, 135.9, 132.0, 131.1, 130.2, 129.9, 129.5, 128.7, 128.2, 128.1, 127.5, 123.7, 113.9, 76.5, 73.3, 59.2, 42.0, 31.4, 21.2; HRMS (ESI):  $m/z$   $[\text{M}+\text{H}]^+$  calcd for  $\text{C}_{26}\text{H}_{23}\text{N}_2\text{O}_3\text{S}$ : 443.1424; found: 443.1421.

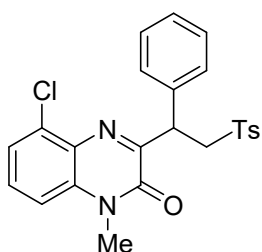

**5-chloro-1-methyl-3-(1-phenyl-2-tosylethyl)quinoxalin-2(1H)-one (5d):** White solid, mp 156-158°C, 100.3 mg, 74% yield.  $R_f = 0.35$  (petroleum ether/ethyl acetate = 3:1).  $^1\text{H NMR}$  (400 MHz,  $\text{CDCl}_3$ )  $\delta$  7.70 (d,  $J = 8.2$  Hz, 2 H), 7.41 – 7.34 (m, 4 H), 7.25 – 7.17 (m, 3 H), 7.10 (dd,  $J = 5.9, 3.8$  Hz, 1 H),

7.05 (d,  $J = 8.2$  Hz, 2 H), 5.29 (dd,  $J = 10.8, 2.5$  Hz, 1 H), 4.87 (dd,  $J = 14.2, 10.8$  Hz, 1 H), 3.58 – 3.52 (m, 4 H), 2.11 (s, 3 H);  $^{13}\text{C}$  NMR (100 MHz,  $\text{CDCl}_3$ )  $\delta$  157.5, 153.4, 144.2, 138.1, 136.1, 134.8, 134.3, 130.1, 129.3, 128.8, 128.6, 128.4, 128.3, 127.6, 124.4, 112.2, 59.3, 42.1, 29.5, 21.3; HRMS (ESI):  $m/z$   $[\text{M}+\text{H}]^+$  calcd for  $\text{C}_{26}\text{H}_{23}\text{N}_2\text{O}_3\text{S}$ : 443.1424; found: 443.1421; HRMS (ESI):  $m/z$   $[\text{M}+\text{H}]^+$  calcd for  $\text{C}_{24}\text{H}_{22}\text{ClN}_2\text{O}_3\text{S}$ : 453.1034; found: 453.1035.

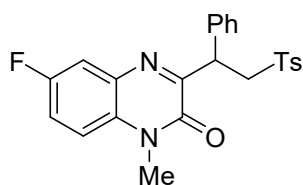

**6-fluoro-1-methyl-3-(1-phenyl-2-tosylethyl)quinoxalin-2(1H)-one (5e):** White solid, mp 165-167°C, 94.2 mg, 72% yield.  $R_f = 0.35$  (petroleum ether/ethyl acetate = 3:1).  $^1\text{H}$  NMR (400 MHz,  $\text{CDCl}_3$ )  $\delta$  7.67 (d,  $J = 8.2$  Hz, 2 H), 7.42 (dd,  $J = 8.6, 2.9$  Hz, 1 H), 7.33 – 7.29 (m, 2 H), 7.25 – 7.13 (m, 5 H), 7.09 (d,  $J = 8.1$  Hz, 2 H), 5.26 (dd,  $J = 10.5, 3.0$  Hz, 1 H), 4.72 (dd,  $J = 14.3, 10.5$  Hz, 1 H), 3.60 – 3.53 (m, 4 H), 2.20 (s, 3 H);  $^{13}\text{C}$  NMR (100 MHz,  $\text{CDCl}_3$ )  $\delta$  158.9, 158.4 (d,  $J_{\text{C-F}} = 242.0$  Hz), 153.4, 144.3, 138.1, 136.1, 132.4 (d,  $J_{\text{C-F}} = 11.0$  Hz), 129.5, 129.5, 129.4, 128.7, 128.2, 128.2, 117.8 (d,  $J_{\text{C-F}} = 24.0$  Hz), 115.2 (d,  $J_{\text{C-F}} = 22.0$  Hz), 114.5 (d,  $J_{\text{C-F}} = 9.0$  Hz), 59.1, 42.0, 29.3, 21.3;  $^{19}\text{F}$  NMR (376 MHz,  $\text{CDCl}_3$ )  $\delta$  -118.90. The compound spectra data is in accord with the previous literature.<sup>6</sup>

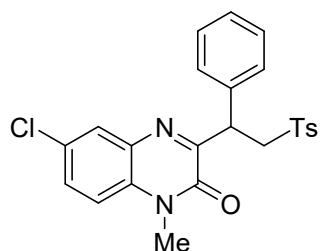

**6-chloro-1-methyl-3-(1-phenyl-2-tosylethyl)quinoxalin-2(1H)-one (5f):** White solid, mp 163-165°C, 86.8 mg, 64% yield.  $R_f = 0.35$  (petroleum ether/ethyl acetate = 3:1).  $^1\text{H}$  NMR (400 MHz,  $\text{CDCl}_3$ )  $\delta$  7.73 (d,  $J = 2.4$  Hz, 1 H), 7.68 (d,  $J = 8.3$  Hz, 2 H), 7.46 (dd,  $J = 8.9, 2.4$  Hz, 1 H), 7.33 – 7.29 (m, 2 H), 7.24 – 7.17 (m, 3 H), 7.13 (t,  $J = 8.4$  Hz, 3 H), 5.26 (dd,  $J = 10.5, 3.0$  Hz, 1 H), 4.72 (dd,  $J = 14.3, 10.6$  Hz, 1 H), 3.61 – 3.54 (m, 4 H), 2.23 (s, 3 H);  $^{13}\text{C}$  NMR (100 MHz,  $\text{CDCl}_3$ )  $\delta$  158.8, 153.5, 144.4, 138.1, 136.3, 132.5, 131.6, 130.1, 129.5, 129.3, 128.8, 128.8, 128.3, 128.2, 127.6, 114.6, 59.2, 42.1, 29.3, 21.4. The compound spectra data is in accord with the previous literature.<sup>6</sup>



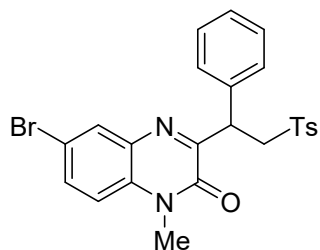

**6-bromo-1-methyl-3-(1-phenyl-2-tosylethyl)quinoxalin-2(1H)-one (5g):** White solid, mp 171-173°C, 93.7 mg, 63% yield.  $R_f = 0.35$  (petroleum ether/ethyl acetate = 3:1).  $^1\text{H NMR}$  (400 MHz,  $\text{CDCl}_3$ )  $\delta$  7.89 (d,  $J = 2.3$  Hz, 1 H), 7.68 (d,  $J = 8.2$  Hz, 2 H), 7.59 (dd,  $J = 8.9, 2.3$  Hz, 1 H), 7.33 – 7.29 (m, 2 H), 7.25 – 7.18 (m, 3 H), 7.10 (dd,  $J = 14.9, 8.5$  Hz, 3 H), 5.26 (dd,  $J = 10.6, 2.9$  Hz, 1 H), 4.72 (dd,  $J = 14.3, 10.6$  Hz, 1 H), 3.61 – 3.54 (m, 4 H), 2.24 (s, 3 H);  $^{13}\text{C NMR}$  (100 MHz,  $\text{CDCl}_3$ )  $\delta$  158.8, 153.5, 144.4, 138.0, 136.3, 132.9, 132.8, 132.3, 132.1, 129.5, 128.8, 128.3, 128.2, 127.6, 116.0, 114.9, 59.2, 42.1, 29.3, 21.4. The compound spectra data is in accord with the previous literature.<sup>6</sup>

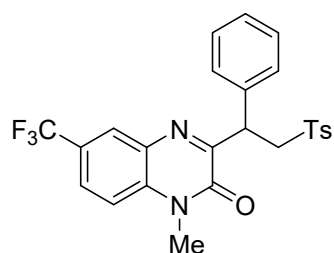

**1-methyl-3-(1-phenyl-2-tosylethyl)-6-(trifluoromethyl)quinoxalin-2(1H)-one (5h):** White solid, mp 164-166°C, 103.85 mg, 71% yield.  $R_f = 0.33$  (petroleum ether/ethyl acetate = 3:1).  $^1\text{H NMR}$  (400 MHz,  $\text{CDCl}_3$ )  $\delta$  7.98 (d,  $J = 1.6$  Hz, 1 H), 7.72 – 7.67 (m, 1 H), 7.46 (d,  $J = 8.3$  Hz, 2 H), 7.32 (d,  $J = 8.8$  Hz, 1 H), 7.27 – 7.26 (m, 1 H), 7.26 – 7.20 (m, 4 H), 7.16 (d,  $J = 8.1$  Hz, 2 H), 5.23 (dd,  $J = 9.2, 5.4$  Hz, 1 H), 3.98 (dd,  $J = 17.7, 5.9$  Hz, 1 H), 3.79 (dd,  $J = 17.2, 9.2$  Hz, 1 H), 3.65 (s, 3 H), 2.35 (s, 3 H);  $^{13}\text{C NMR}$  (100 MHz,  $\text{CDCl}_3$ )  $\delta$  157.7, 154.3, 144.6, 133.8, 132.2, 130.2 (q,  $J_{\text{C-F}} = 272.0$  Hz), 130.1, 129.5, 129.3, 129.2, 128.7, 128.6 (q,  $J_{\text{C-F}} = 32.0$  Hz), 128.3, 128.2, 127.1 (q,  $J_{\text{C-F}} = 4.0$  Hz), 126.4 (q,  $J_{\text{C-F}} = 4.0$  Hz), 114.3, 67.5, 32.6, 29.3, 21.5;  $^{19}\text{F NMR}$  (376 MHz,  $\text{CDCl}_3$ )  $\delta$  -61.92. The compound spectra data is in accord with the previous literature.<sup>6</sup>

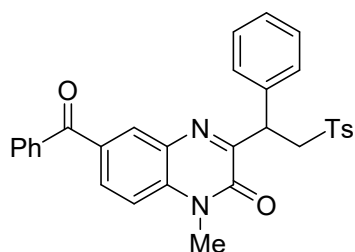

**6-benzoyl-1-methyl-3-(1-phenyl-2-tosylethyl)quinoxalin-2(1H)-one (5i):** White solid, mp 183-185°C, 106.5 mg, 68% yield.  $R_f = 0.32$  (petroleum ether/ethyl acetate = 2:1).  $^1\text{H NMR}$  (400 MHz,  $\text{CDCl}_3$ )  $\delta$  8.21 (d,  $J = 2.0$  Hz, 1 H), 8.05 (dd,  $J = 8.7, 2.0$  Hz, 1 H), 7.87 – 7.82 (m, 2 H), 7.68 (dd,  $J = 15.2, 7.8$  Hz, 3 H), 7.57 (t,  $J = 7.6$  Hz, 2 H), 7.35 – 7.30 (m, 3 H), 7.24 – 7.12 (m, 5 H), 5.27 (dd,  $J = 10.4, 3.0$  Hz, 1 H), 4.73 (dd,  $J = 14.3, 10.4$  Hz, 1 H), 3.65 (s, 3 H), 3.58 (dd,  $J = 14.3, 3.1$  Hz, 1 H), 2.26 (s, 3 H);  $^{13}\text{C NMR}$  (100 MHz,  $\text{CDCl}_3$ )  $\delta$  194.9, 158.8, 144.4, 138.0, 137.3, 136.2, 136.0, 132.7, 132.6, 132.5, 131.5, 131.2, 130.1, 129.9, 129.5, 128.8, 128.5, 128.3, 128.3, 127.6, 113.7, 59.2, 42.0, 29.5, 21.5; HRMS (ESI):  $m/z$   $[\text{M}+\text{H}]^+$  calcd for  $\text{C}_{31}\text{H}_{27}\text{N}_2\text{O}_4\text{S}$ : 523.1686; found: 523.1692.

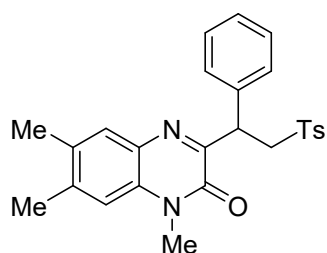

**1,6,7-trimethyl-3-(1-phenyl-2-tosylethyl)quinoxalin-2(1H)-one (5j):** White solid, mp 147-149°C, 82.9 mg, 62% yield.  $R_f = 0.31$  (petroleum ether/ethyl acetate = 3:1).  $^1\text{H NMR}$  (400 MHz, )  $\delta$  7.66 (d,  $J = 8.3$  Hz, 2 H), 7.49 (s, 1 H), 7.34 – 7.30 (m, 2 H), 7.18 (dt,  $J = 14.3, 7.0$  Hz, 3 H), 7.06 (d,  $J = 8.1$  Hz, 2 H), 6.95 (s, 1 H), 5.22 (dd,  $J = 10.1, 3.3$  Hz, 1 H), 4.74 (dd,  $J = 14.3, 10.1$  Hz, 1 H), 3.59 (dd,  $J = 14.3, 3.4$  Hz, 1 H), 3.53 (s, 3 H), 2.38 (s, 3 H), 2.35 (s, 3 H), 2.18 (s, 3 H);  $^{13}\text{C NMR}$  (100 MHz,  $\text{CDCl}_3$ )  $\delta$  155.9, 153.8, 144.0, 140.0, 138.7, 136.2, 132.3, 130.9, 130.5, 130.0, 129.3, 128.6, 128.3, 128.2, 127.3, 113.9, 59.3, 42.0, 28.9, 21.3, 20.5, 19.1. The compound spectra data is in accord with the previous literature.<sup>6</sup>

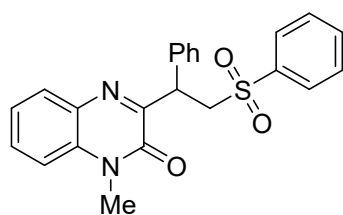

**1-methyl-3-(1-phenyl-2-(phenylsulfonyl)ethyl)quinoxalin-2(1H)-one (5k):** White solid, mp 158-160°C, 86.1 mg, 71% yield.  $R_f = 0.35$  (petroleum ether/ethyl acetate = 3:1).  $^1\text{H NMR}$  (400 MHz,  $\text{CDCl}_3$ )  $\delta$  7.85 – 7.79 (m, 2 H), 7.77 (dd,  $J = 8.0, 1.3$  Hz, 1 H), 7.55 – 7.48 (m, 1 H), 7.39 – 7.29 (m, 6 H), 7.23 – 7.13 (m, 4 H), 5.28 (dd,  $J = 9.8, 3.6$  Hz, 1 H), 4.79 (dd,  $J = 14.3, 10.0$  Hz, 1 H), 3.65 (dd,  $J = 14.4, 3.5$  Hz, 1 H), 3.57 (s, 3 H);  $^{13}\text{C NMR}$  (100 MHz,  $\text{CDCl}_3$ )  $\delta$  157.3, 153.8, 139.2, 138.3, 133.1, 132.9,

132.0, 130.3, 130.0, 128.8, 128.7, 128.3, 127.5, 123.5, 113.5, 59.2, 42.0, 29.1. The compound spectra data is in accord with the previous literature.<sup>8</sup>

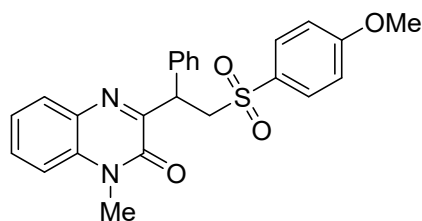

**3-(2-((4-methoxyphenyl)sulfonyl)-1-phenylethyl)-1-methylquinoxalin-2(1H)-one (5l):** White solid, mp 157-159°C, 96.3 mg, 74% yield.  $R_f = 0.27$  (petroleum ether/ethyl acetate = 3:1).  $^1\text{H NMR}$  (400 MHz,  $\text{CDCl}_3$ )  $\delta$  7.76 (d,  $J = 7.8$  Hz, 1 H), 7.70 (d,  $J = 8.8$  Hz, 2 H), 7.50 (t,  $J = 8.2$  Hz, 1 H), 7.36 – 7.29 (m, 3 H), 7.24 – 7.15 (m, 4 H), 6.68 (d,  $J = 8.8$  Hz, 2 H), 5.24 (dd,  $J = 10.3, 2.9$  Hz, 1 H), 4.78 (dd,  $J = 14.2, 10.4$  Hz, 1 H), 3.62 (s, 3 H), 3.59 (dd,  $J = 14.4, 3.5$  Hz, 1 H), 3.55 (s, 3 H); Unknown NMR (101 MHz, )  $\delta$  163.1, 157.3, 153.7, 138.5, 132.8, 132.0, 130.5, 130.4, 130.1, 129.9, 128.7, 128.2, 127.4, 123.5, 113.8, 113.4, 59.5, 55.4, 42.1, 29.0. The compound spectra data is in accord with the previous literature.<sup>6</sup>

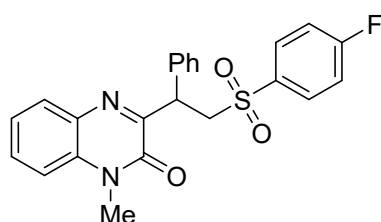

**3-(2-((4-fluorophenyl)sulfonyl)-1-phenylethyl)-1-methylquinoxalin-2(1H)-one (5m):** White solid, mp 146-148°C, 86.1 mg, 68% yield.  $R_f = 0.35$  (petroleum ether/ethyl acetate = 3:1).  $^1\text{H NMR}$  (400 MHz,  $\text{CDCl}_3$ )  $\delta$  7.82 – 7.75 (m, 3 H), 7.53 (t,  $J = 7.8$  Hz, 1 H), 7.36 – 7.30 (m, 3 H), 7.24 – 7.16 (m, 4 H), 6.96 (t,  $J = 8.5$  Hz, 2 H), 5.25 (dd,  $J = 9.8, 3.7$  Hz, 1 H), 4.75 (dd,  $J = 14.4, 9.8$  Hz, 1 H), 3.67 (dd,  $J = 14.4, 3.5$  Hz, 1 H), 3.58 (s, 3 H);  $^{13}\text{C NMR}$  (100 MHz,  $\text{CDCl}_3$ )  $\delta$  165.4 (d,  $J_{\text{C-F}} = 255.0$  Hz), 157.3, 153.8, 138.1, 135.2 (d,  $J_{\text{C-F}} = 3.0$  Hz), 132.9, 132.0, 131.1 (d,  $J_{\text{C-F}} = 10.0$  Hz), 130.4, 129.9, 128.8, 128.3, 127.6, 123.7, 116.0 (d,  $J_{\text{C-F}} = 22.0$  Hz), 113.6, 59.4, 42.1, 29.1;  $^{19}\text{F NMR}$  (376 MHz,  $\text{CDCl}_3$ )  $\delta$  -104.0. The compound spectra data is in accord with the previous literature.<sup>8</sup>

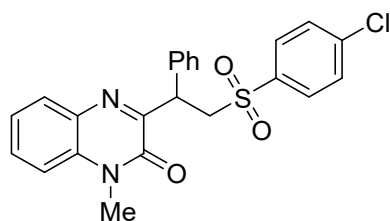

**3-(2-((4-chlorophenyl)sulfonyl)-1-phenylethyl)-1-methylquinoxalin-2(1H)-one (5n):** White solid, mp 156-158°C, 94.6 mg, 72% yield.  $R_f = 0.35$  (petroleum ether/ethyl acetate = 3:1).  $^1\text{H NMR}$  (400 MHz,  $\text{CDCl}_3$ )  $\delta$  7.76 (dd,  $J = 8.0, 1.4$  Hz, 1 H), 7.71 (d,  $J = 8.6$  Hz, 2 H), 7.56 – 7.51 (m, 1 H), 7.37 – 7.31 (m, 3 H), 7.25 – 7.16 (m, 6 H), 5.24 (dd,  $J = 10.1, 3.5$  Hz, 1 H), 4.77 (dd,  $J = 14.4, 10.1$  Hz, 1 H), 3.66 (dd,  $J = 14.4, 3.5$  Hz, 1 H), 3.58 (s, 3 H);  $^{13}\text{C NMR}$  (100 MHz,  $\text{CDCl}_3$ )  $\delta$  157.1, 153.7, 139.9, 138.1, 137.6, 132.9, 132.0, 130.5, 129.8, 129.0, 128.8, 128.3, 127.6, 123.7, 113.6, 59.4, 42.1, 29.1. The compound spectra data is in accord with the previous literature.<sup>8</sup>

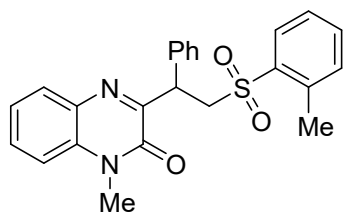

**1-methyl-3-(1-phenyl-2-(o-tolylsulfonyl)ethyl)quinoxalin-2(1H)-one (5o):** White solid, mp 147-149°C, 81.5 mg, 65% yield.  $R_f = 0.35$  (petroleum ether/ethyl acetate = 3:1).  $^1\text{H NMR}$  (400 MHz,  $\text{CDCl}_3$ )  $\delta$  7.93 – 7.85 (m, 1 H), 7.76 (dd,  $J = 8.0, 1.4$  Hz, 1 H), 7.53 – 7.48 (m, 1 H), 7.38 – 7.30 (m, 3 H), 7.25 – 7.11 (m, 6 H), 6.93 – 6.85 (m, 1 H), 5.28 (dd,  $J = 10.3, 2.9$  Hz, 1 H), 4.88 (dd,  $J = 14.2, 10.3$  Hz, 1 H), 3.61 (dd,  $J = 14.4, 3.5$  Hz, 1 H), 3.51 (s, 3 H), 2.67 (s, 3 H);  $^{13}\text{C NMR}$  (100 MHz,  $\text{CDCl}_3$ )  $\delta$  157.4, 153.7, 138.5, 138.4, 137.0, 133.0, 132.9, 132.2, 131.9, 130.4, 130.2, 129.8, 128.7, 128.2, 127.5, 126.0, 123.5, 113.4, 58.2, 41.9, 29.0, 20.5; HRMS (ESI):  $m/z$   $[\text{M}+\text{H}]^+$  calcd for  $\text{C}_{24}\text{H}_{23}\text{N}_2\text{O}_3\text{S}$ : 419.1424; found: 419.1420.

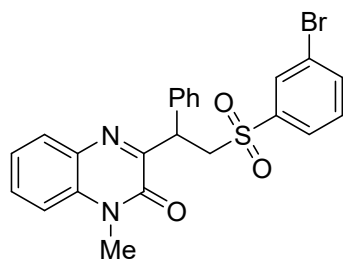

**3-(2-((3-bromophenyl)sulfonyl)-1-phenylethyl)-1-methylquinoxalin-2(1H)-one (5p):** White solid, mp 163-165°C, 107.0 mg, 74% yield.  $R_f = 0.35$  (petroleum ether/ethyl acetate = 3:1).  $^1\text{H NMR}$  (400 MHz,  $\text{CDCl}_3$ )  $\delta$  7.87 – 7.84 (m, 1 H), 7.72 (dd,  $J = 8.0, 1.4$  Hz, 2 H), 7.55 – 7.50 (m, 1 H), 7.38 – 7.30 (m, 4 H), 7.25 – 7.10 (m, 5 H), 5.30 (dd,  $J = 9.9, 3.7$  Hz, 1 H), 4.74 (dd,  $J = 14.4, 9.8$  Hz, 1 H), 3.69 (dd,  $J = 14.4, 3.7$  Hz, 1 H), 3.60 (s, 3 H);  $^{13}\text{C NMR}$  (100 MHz,  $\text{CDCl}_3$ )  $\delta$  157.0, 153.7, 141.2, 137.9, 135.9, 132.9, 131.9, 131.1, 130.4, 130.2, 130.0, 128.8, 128.3, 127.7, 126.8, 123.6, 122.9, 113.5, 59.3,

42.1, 29.2. The compound spectra data is in accord with the previous literature.<sup>6</sup>

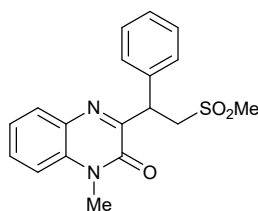

**1-methyl-3-(2-(methylsulfonyl)-1-phenylethyl)quinoxalin-2(1H)-one (5r):** White solid, mp 64-66°C, 26.7 mg, 26% yield.  $R_f = 0.32$  (petroleum ether/ethyl acetate = 4:1).  $^1\text{H NMR}$  (400 MHz, Chloroform-*d*)  $\delta$  7.92 (d,  $J = 7.9$  Hz, 1 H), 7.58 (t,  $J = 7.7$  Hz, 1 H), 7.51 (d,  $J = 7.4$  Hz, 2H), 7.41 – 7.27 (m, 5H), 5.37 (t,  $J = 7.0$  Hz, 1 H), 4.37 (dd,  $J = 14.7, 7.8$  Hz, 1 H), 3.73 (dd,  $J = 14.8, 6.2$  Hz, 1 H), 3.64 (s, 3 H), 2.66 (s, 3 H);  $^{13}\text{C NMR}$  (100 MHz, Chloroform-*d*)  $\delta$  157.8, 153.8, 138.1, 133.3, 132.1, 130.5, 130.0, 129.0, 128.7, 127.9, 123.7, 113.7, 58.6, 42.6, 42.0, 29.2; HRMS (ESI):  $m/z$   $[\text{M}+\text{H}]^+$  calcd for  $\text{C}_{18}\text{H}_{19}\text{N}_2\text{O}_3\text{S}$ : 343.1111; found: 343.1115.

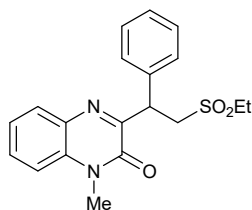

**3-(2-(ethylsulfonyl)-1-phenylethyl)-1-methylquinoxalin-2(1H)-one (5s):** White solid, mp 56-58°C, 24.5 mg, 23% yield.  $R_f = 0.33$  (petroleum ether/ethyl acetate = 4:1).  $^1\text{H NMR}$  (400 MHz, Chloroform-*d*)  $\delta$  7.90 (d,  $J = 7.9$  Hz, 1 H), 7.55 (t,  $J = 7.8$  Hz, 1 H), 7.48 (d,  $J = 7.6$  Hz, 2 H), 7.36 (t,  $J = 7.5$  Hz, 1 H), 7.33 – 7.22 (m, 4 H), 5.36 (t,  $J = 6.8$  Hz, 1 H), 4.37 (dd,  $J = 14.6, 8.2$  Hz, 1 H), 3.67 – 3.55 (m, 4 H), 2.80 – 2.68 (m, 2 H), 1.30 (t,  $J = 7.5$  Hz, 3 H);  $^{13}\text{C NMR}$  (100 MHz, Chloroform-*d*)  $\delta$  157.8, 153.8, 138.3, 133.3, 132.1, 130.4, 130.0, 128.9, 128.6, 127.8, 123.7, 113.7, 55.5, 48.2, 42.2, 29.2, 6.5; HRMS (ESI):  $m/z$   $[\text{M}+\text{H}]^+$  calcd for  $\text{C}_{19}\text{H}_{21}\text{N}_2\text{O}_3\text{S}$ : 357.1267; found: 357.1264.

#### 4. References

1. M. Gao, Y. Li, L. Xie, R. Chauvin and X. Cui, *Chem. Commun.*, 2016, **52**, 2846-2849.
2. M. A. Cismesia and T. P. Yoon, *Chemical Science*, 2015, **6**, 5426-5434.
3. (a) J. N. Demas, W. D. Bowman, E. F. Zalewski and R. A. Velapoldi, *J. Phys. Chem.*, 1981, **85**, 2766-2771; (b) M. El Khatib, R. A. M. Serafim and G. A. Molander, *Angew. Chem. Int. Ed.*, 2016, **55**, 254-258.
4. Y.-P. Cai, F.-Y. Nie and Q.-H. Song, *J. Org. Chem.*, 2021, **86**, 12419-12426.
5. Y. Lv, J. Luo, M. Lin, H. Yue, B. Dai and L. He, *Org. Chem. Front.*, 2021, **8**, 5403-5409.
6. H. Sekhar Dutta, A. Ahmad, A. A. Khan, M. Kumar, Raziullah and D. Koley, *Adv. Synth. Catal.*,

- 2019, **361**, 5534-5539.
7. G. Yang, S. Wang, H. Nie, Z. Xiong, X. Li, F. Ji and G. Jiang, *Appl. Organomet. Chem.*, 2022, **36**, e6470.
  8. Z. Wang, Q. Liu, R. Liu, Z. Ji, Y. Li, X. Zhao and W. Wei, *Chin. Chem. Lett.*, 2022, **33**, 1479-1482.

## 5. $^1\text{H}$ and $^{13}\text{C}$ NMR spectra of products

**1-methyl-3-(1-phenyl-2-tosylethyl)quinoxalin-2(1H)-one (4a)**

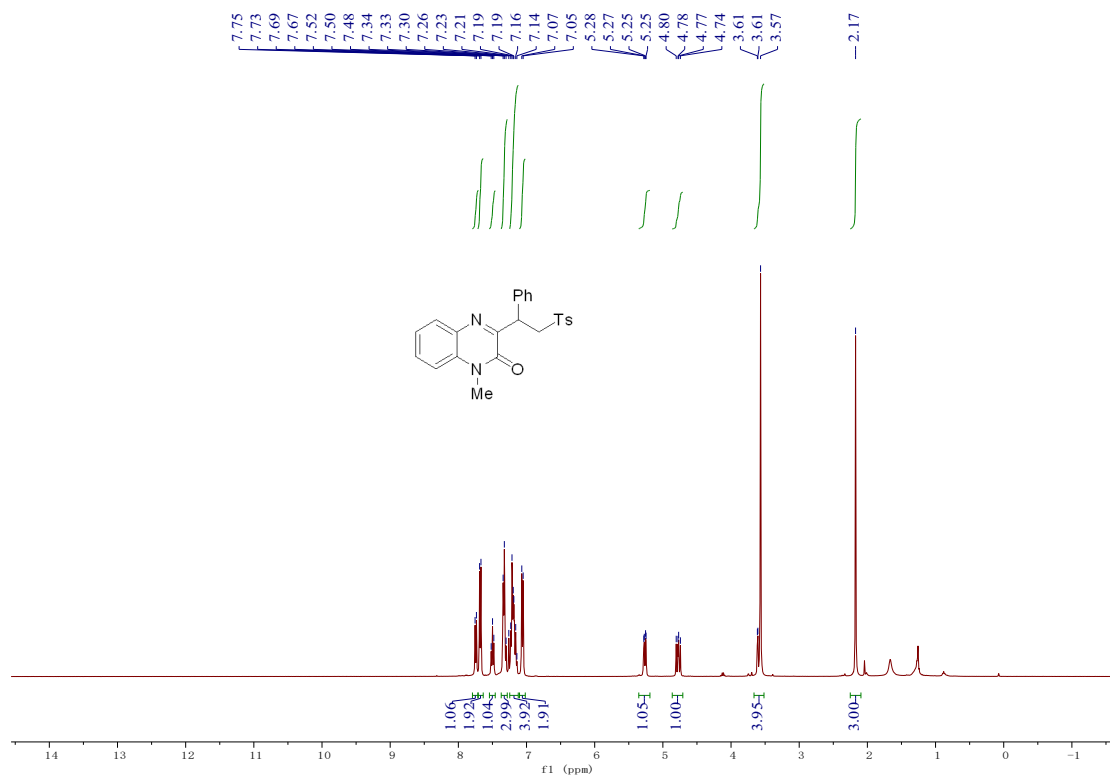

<sup>1</sup>H spectra of 4a

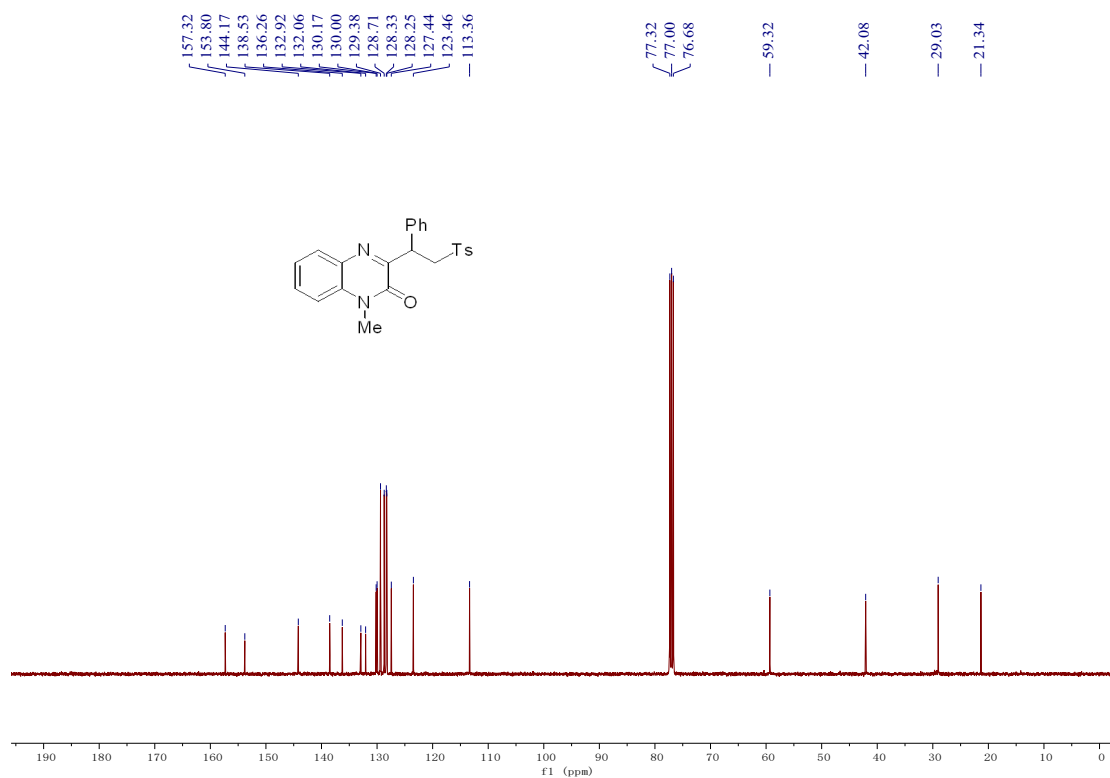

<sup>13</sup>C spectra of 4a

1-methyl-3-(1-(p-tolyl)-2-tosylethyl)quinoxalin-2(1H)-one (4b)

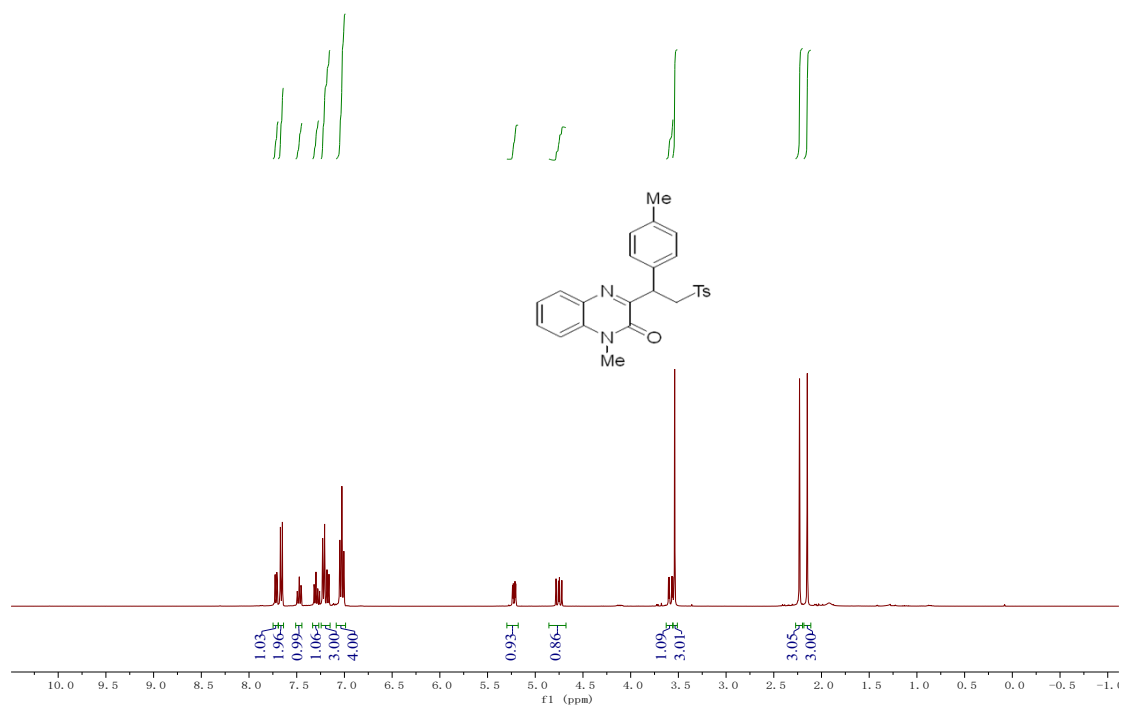

<sup>1</sup>H spectra of 4b

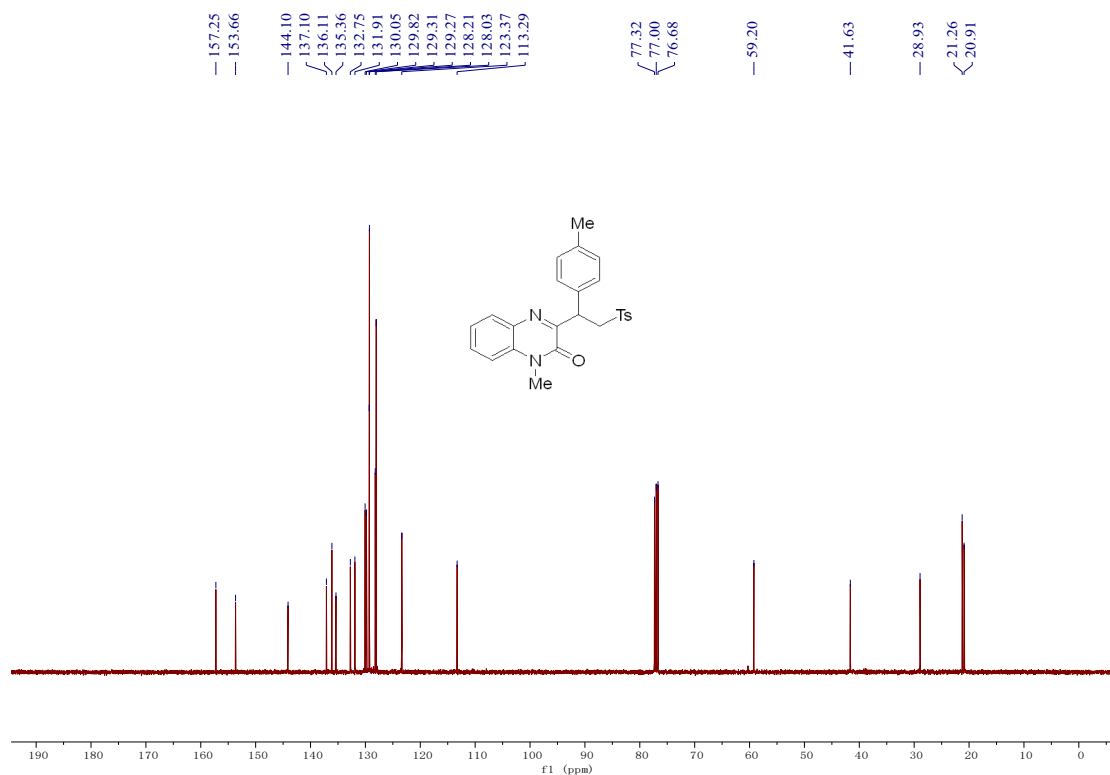

<sup>13</sup>C spectra of 4b

**3-(1-(4-(tert-butyl)phenyl)-2-tosylethyl)-1-methylquinoxalin-2(1H)-one (4c)**



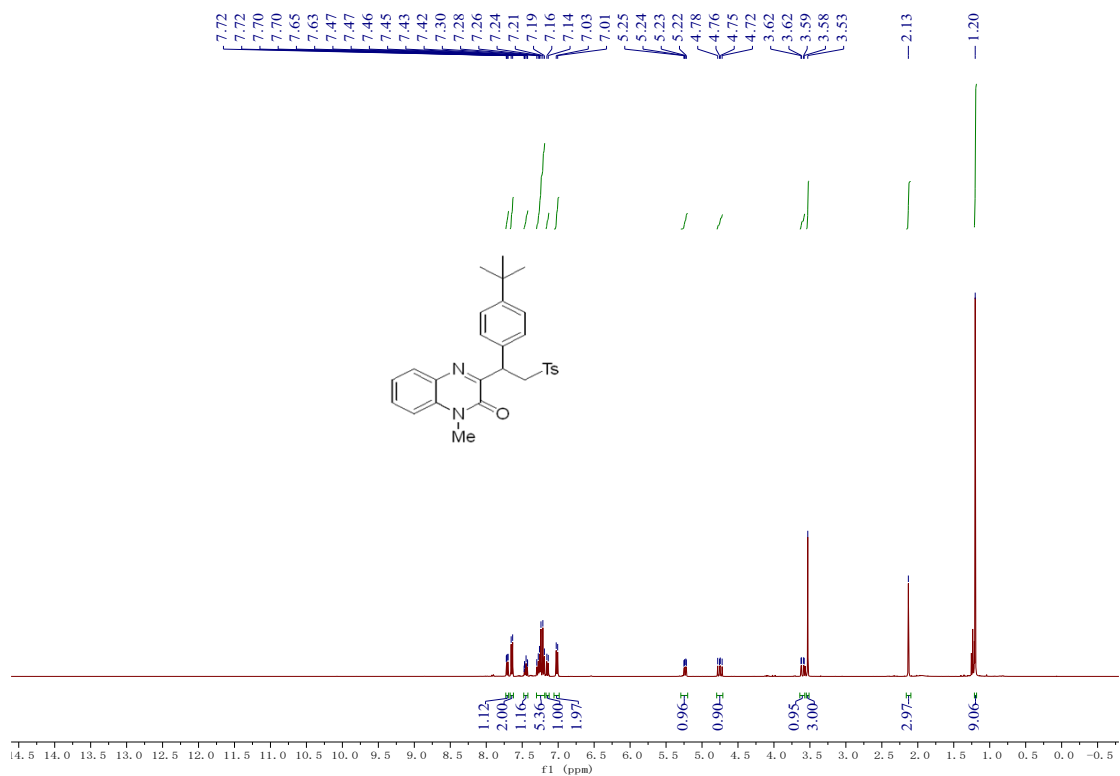

<sup>1</sup>H spectra of 4c

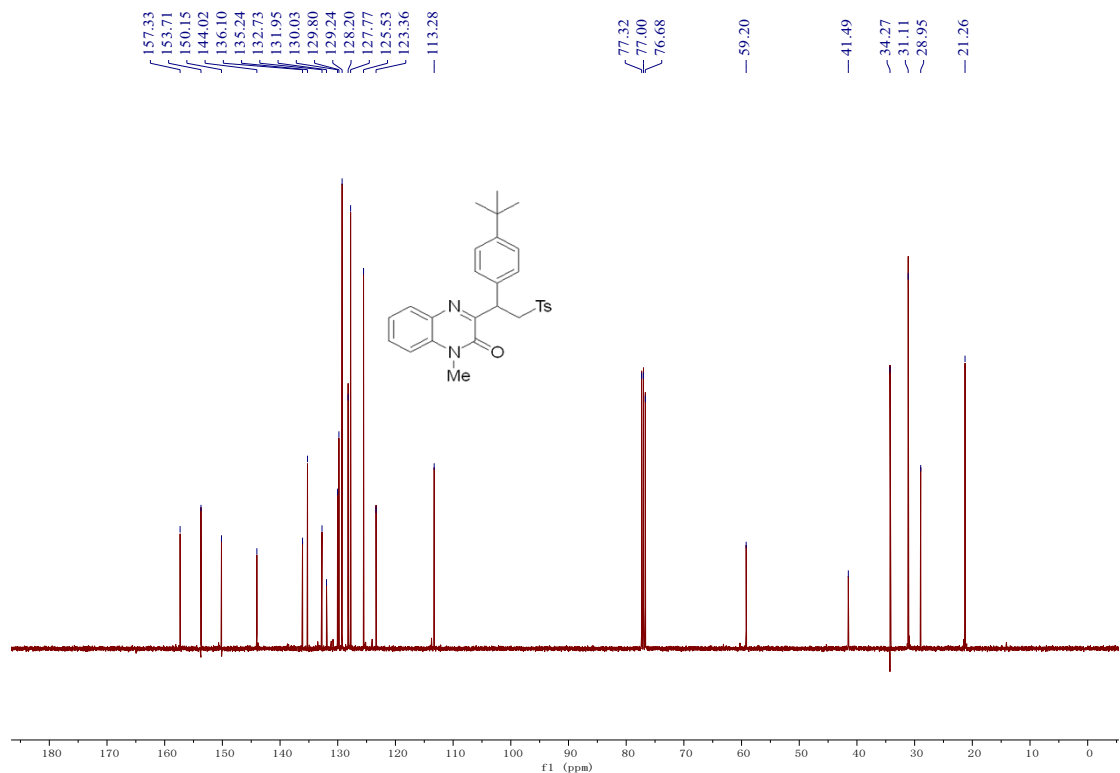

<sup>13</sup>C spectra of 4c

**3-(1-(4-methoxyphenyl)-2-tosylethyl)-1-methylquinoxalin-2(1H)-one (4d)**

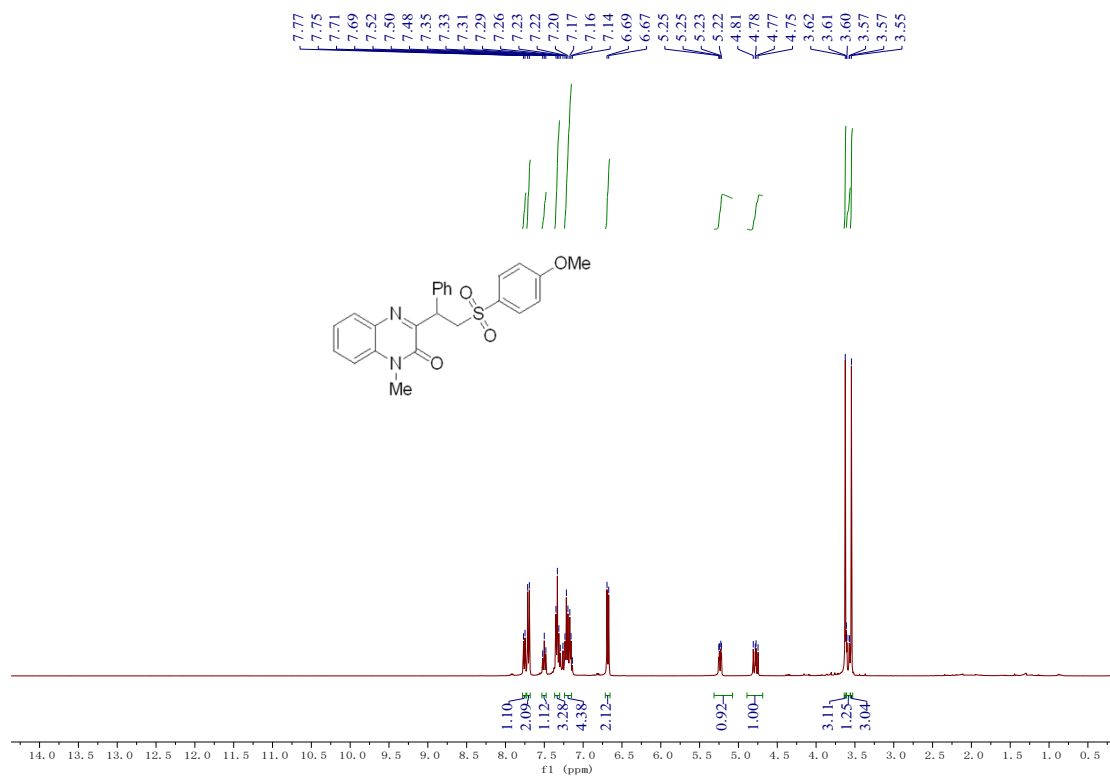

<sup>1</sup>H spectra of 4d

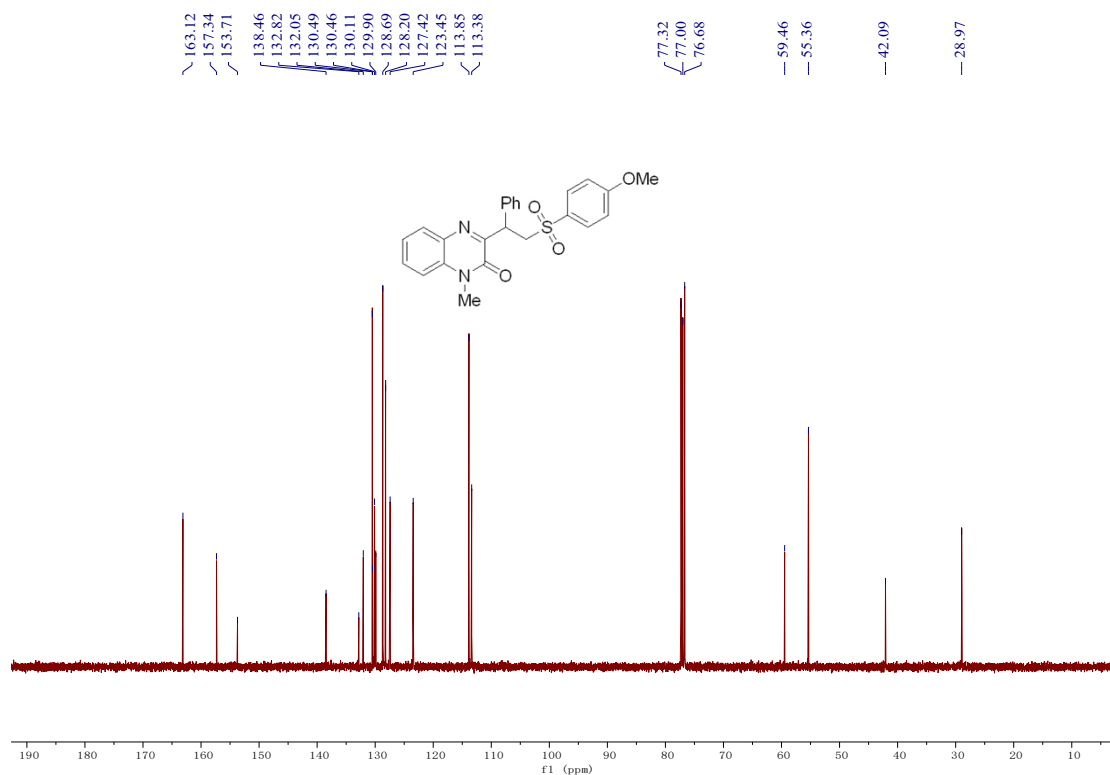

<sup>13</sup>C spectra of 4d

4-(1-(4-methyl-3-oxo-3,4-dihydroquinoxalin-2-yl)-2-tosylethyl)phenyl acetate (4e)

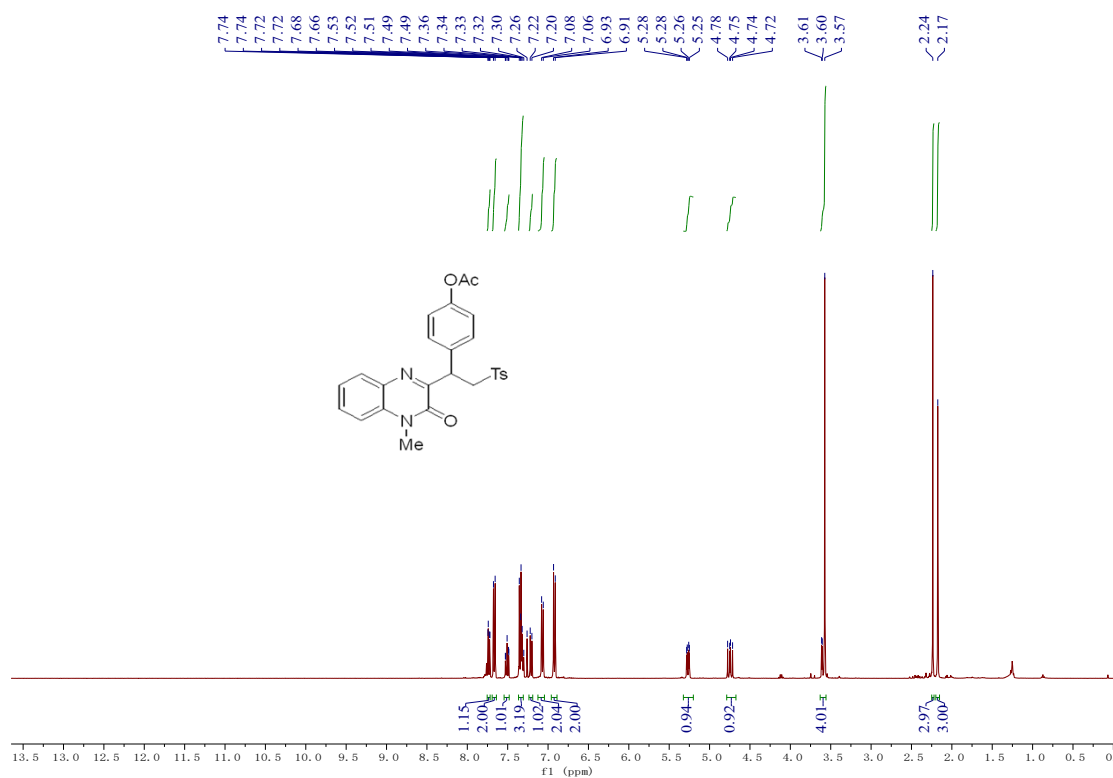

<sup>1</sup>H spectra of 4e

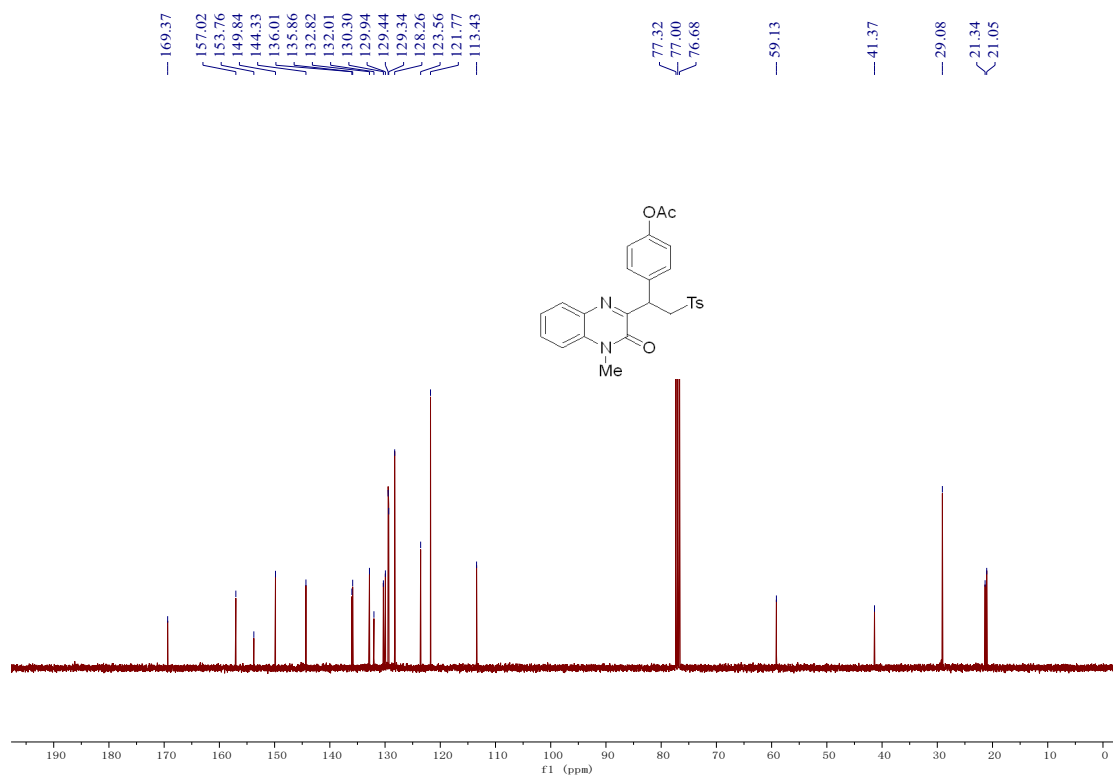

<sup>13</sup>C spectra of 4e

**3-(1-(4-fluorophenyl)-2-tosylethyl)-1-methylquinoxalin-2(1H)-one (4f)**

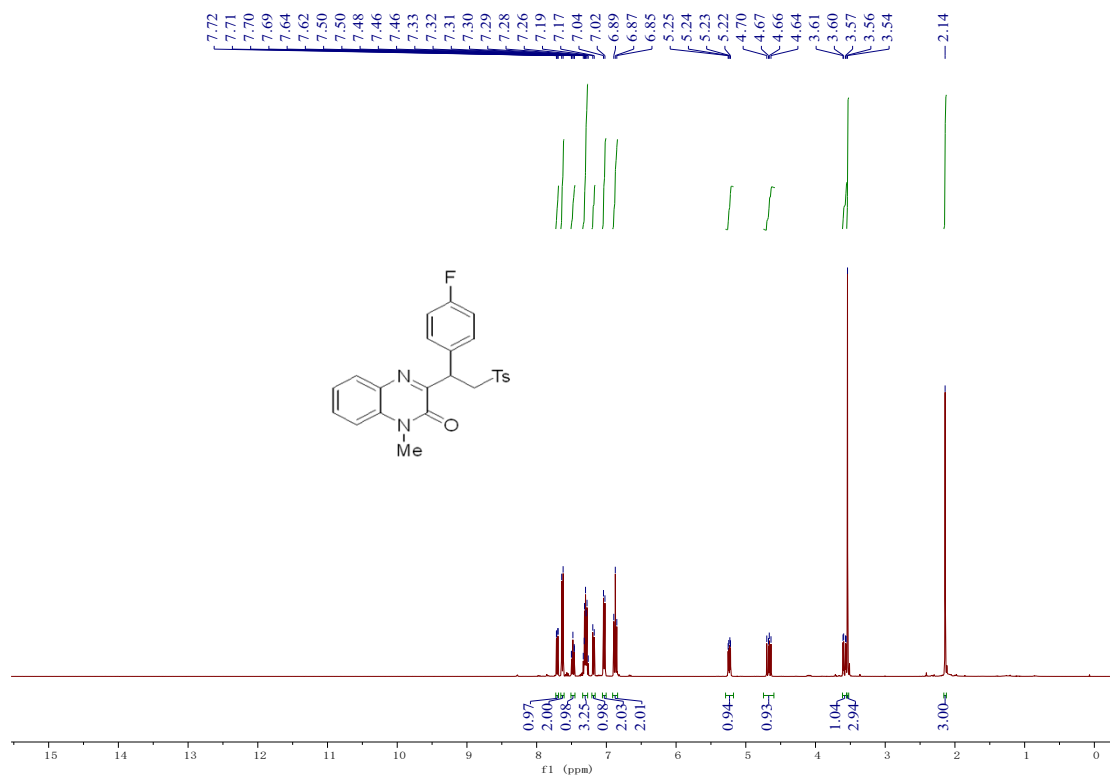

<sup>1</sup>H spectra of 4f

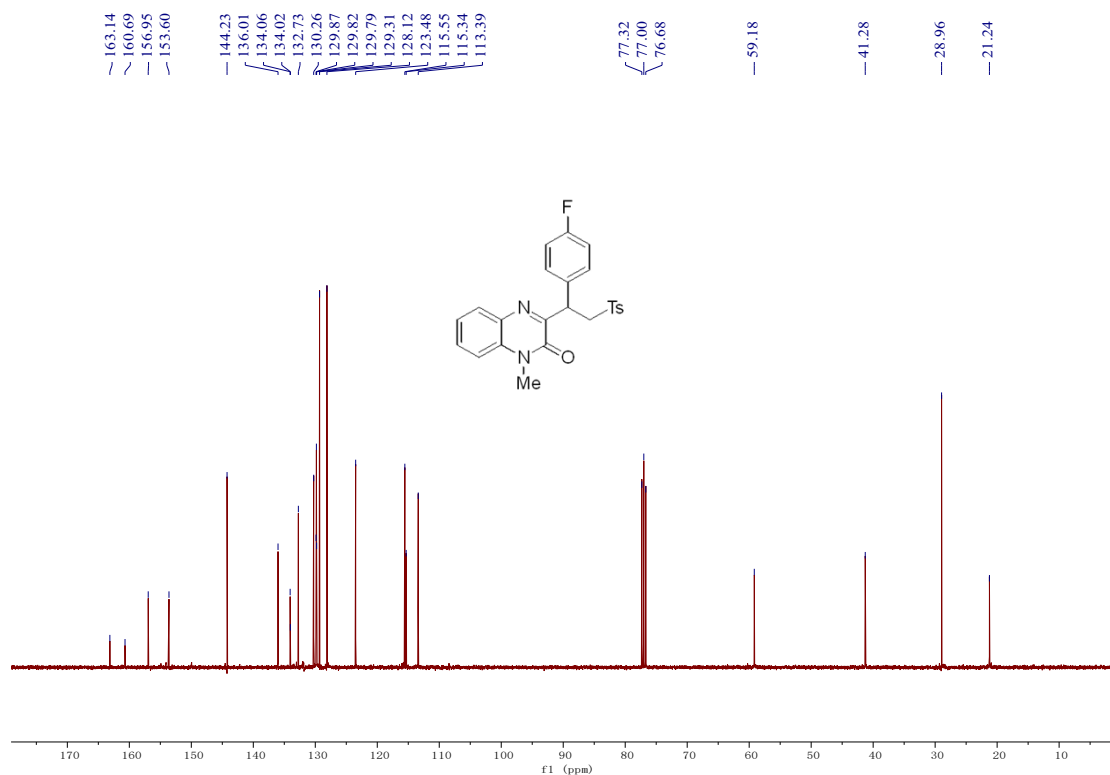

<sup>13</sup>C spectra of 4f

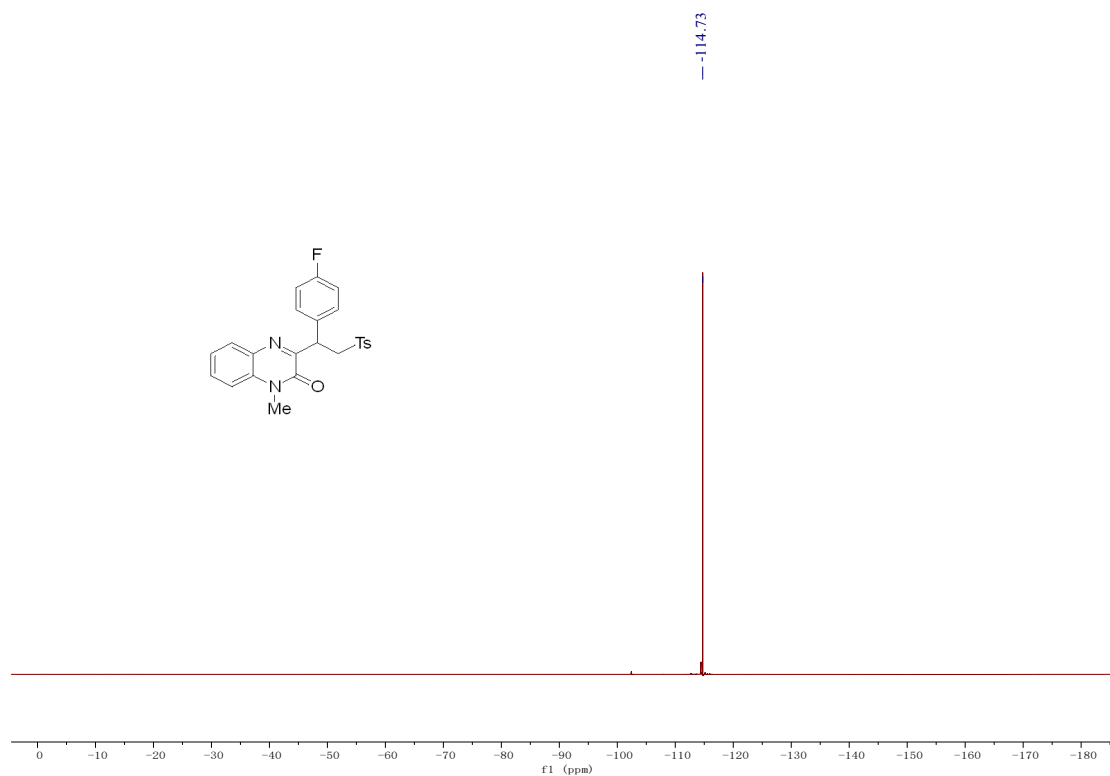

$^{19}\text{F}$  spectra of **4f**

**3-(1-(4-chlorophenyl)-2-tosylethyl)-1-methylquinoxalin-2(1H)-one (4g)**

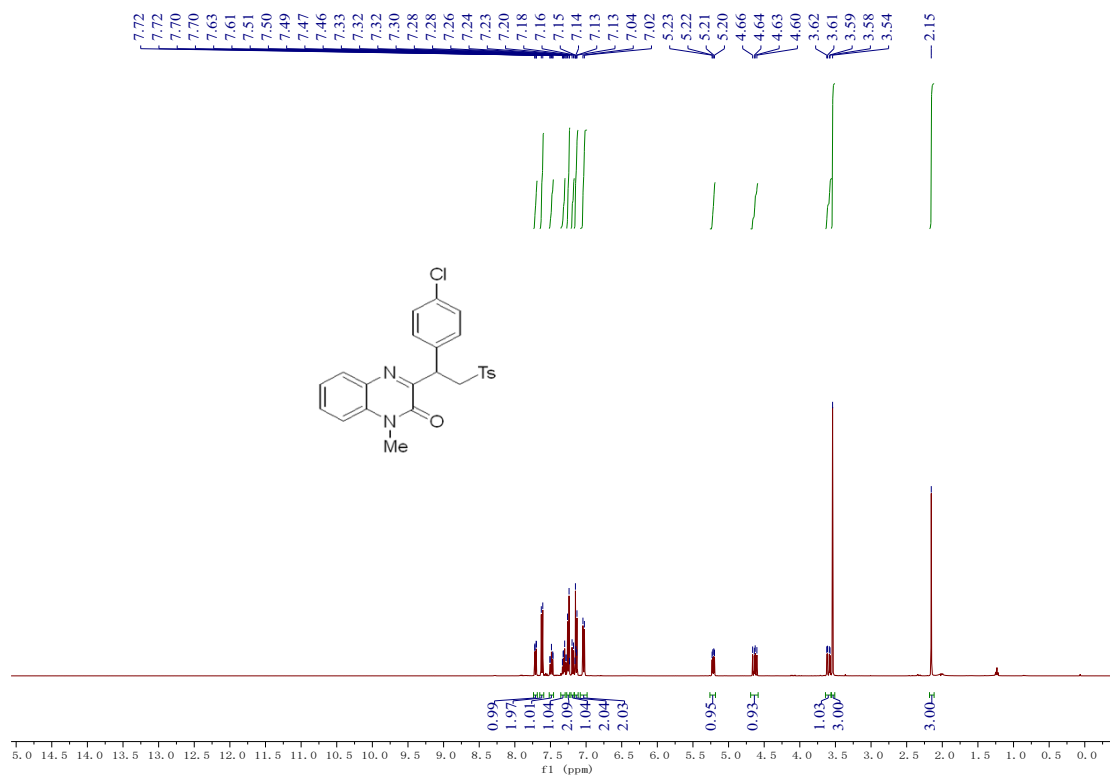

$^1\text{H}$  spectra of **4g**

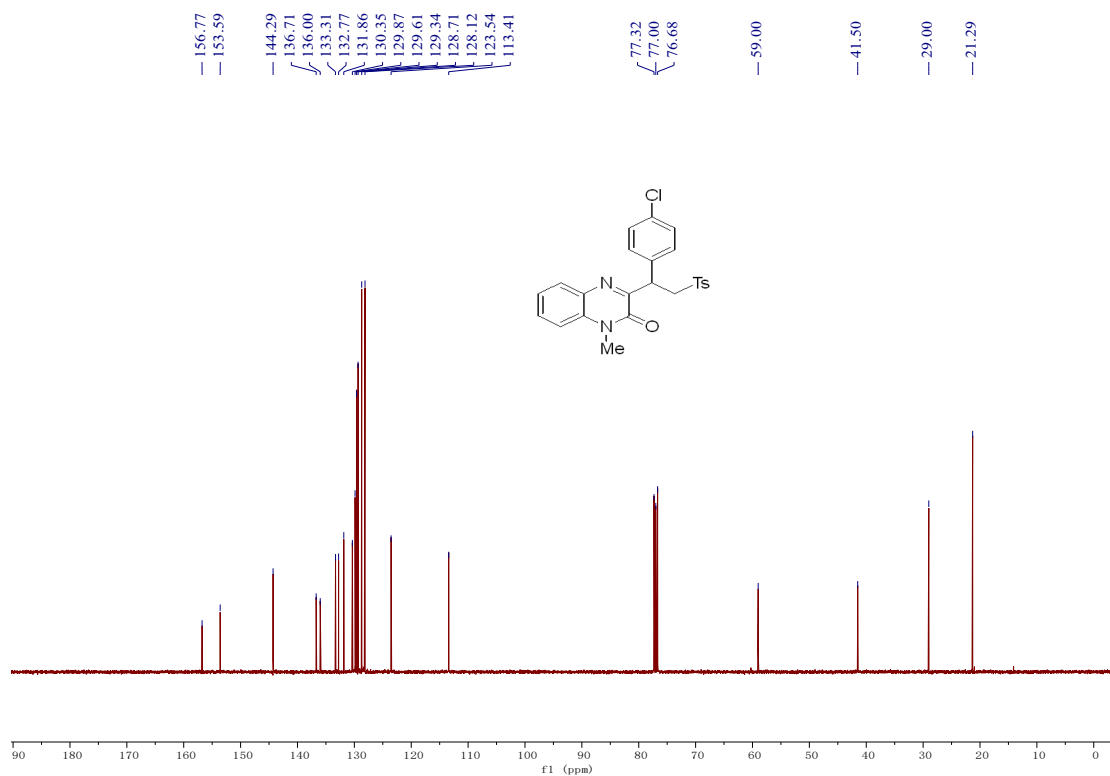

<sup>13</sup>C spectra of 4g

**3-(1-(4-bromophenyl)-2-tosylethyl)-1-methylquinoxalin-2(1H)-one (4h)**

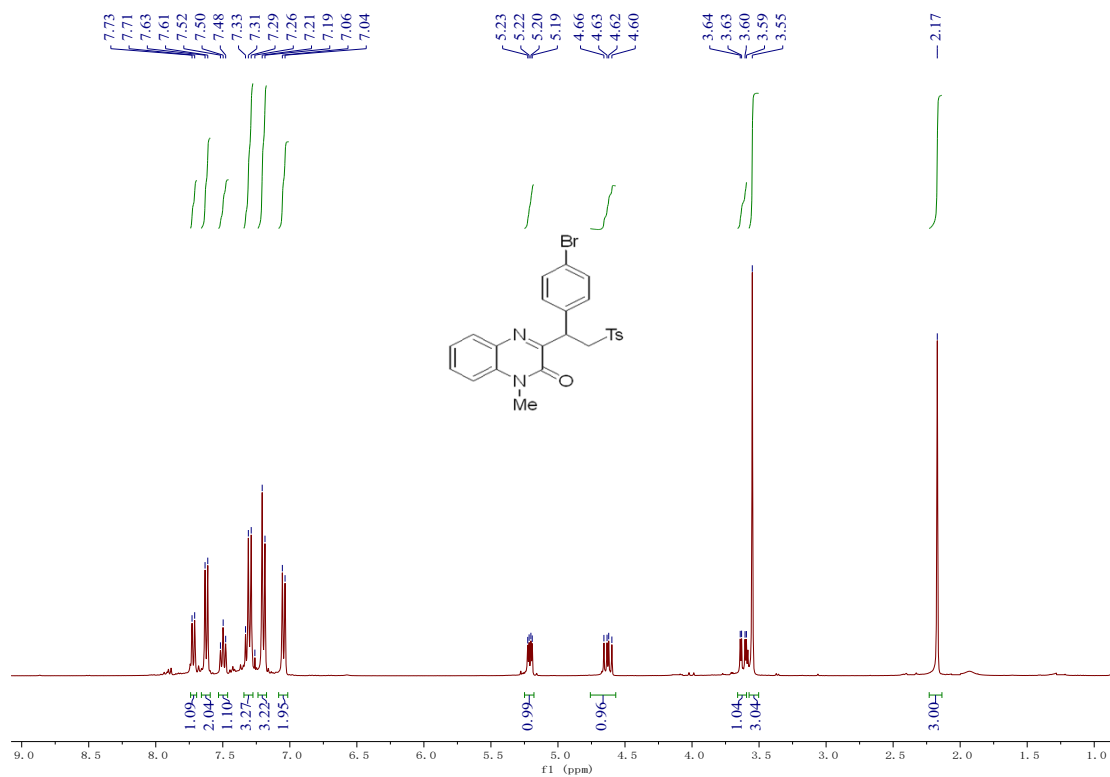

<sup>1</sup>H spectra of 4h

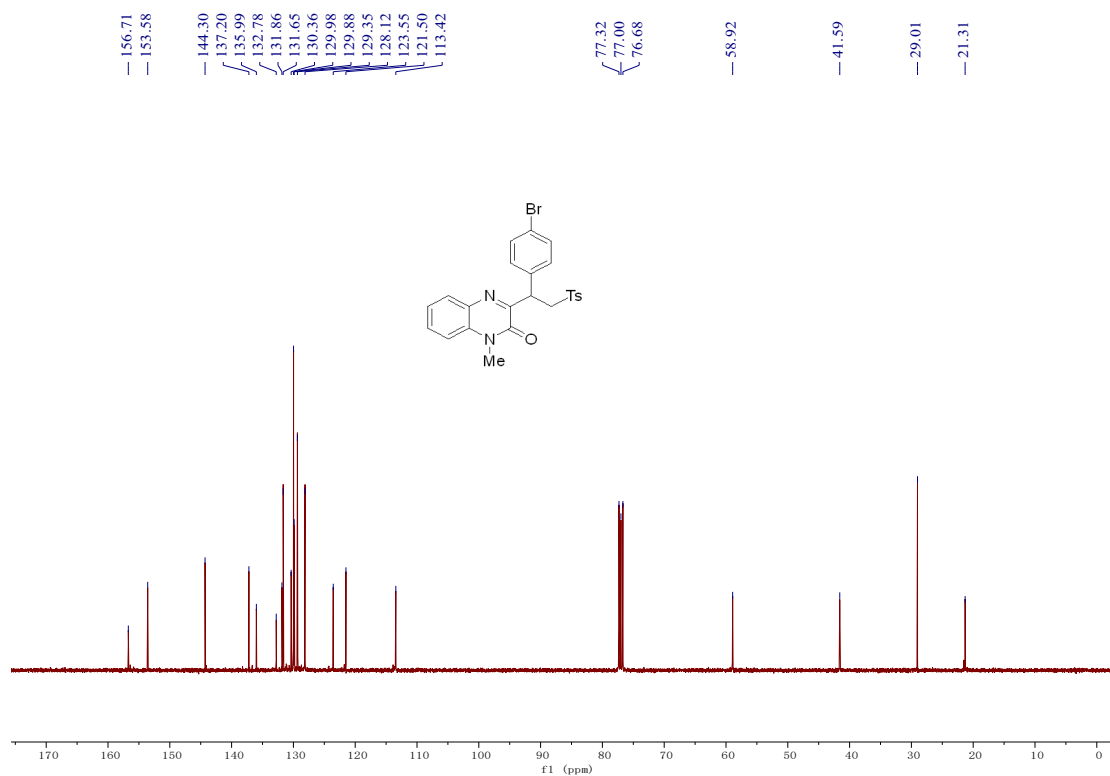

<sup>13</sup>C spectra of **4h**

**1-methyl-3-(2-tosyl-1-(4-(trifluoromethyl)phenyl)ethyl)quinoxalin-2(1H)-one (4i)**

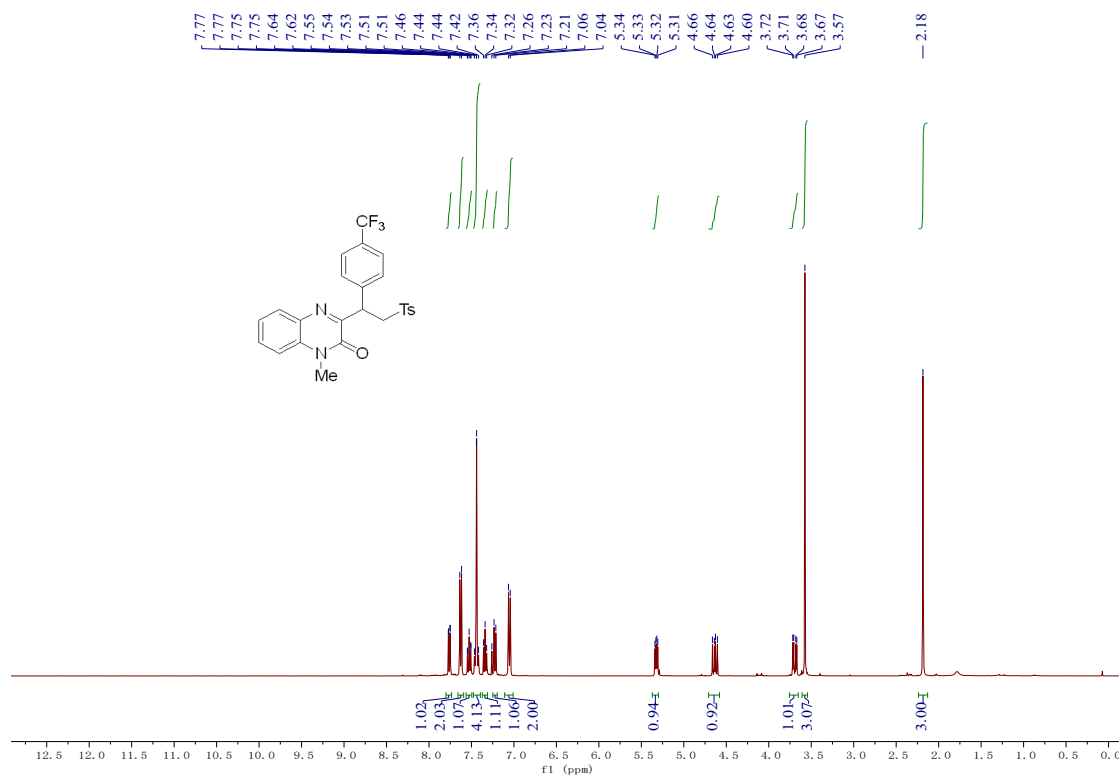

<sup>1</sup>H spectra of **4i**

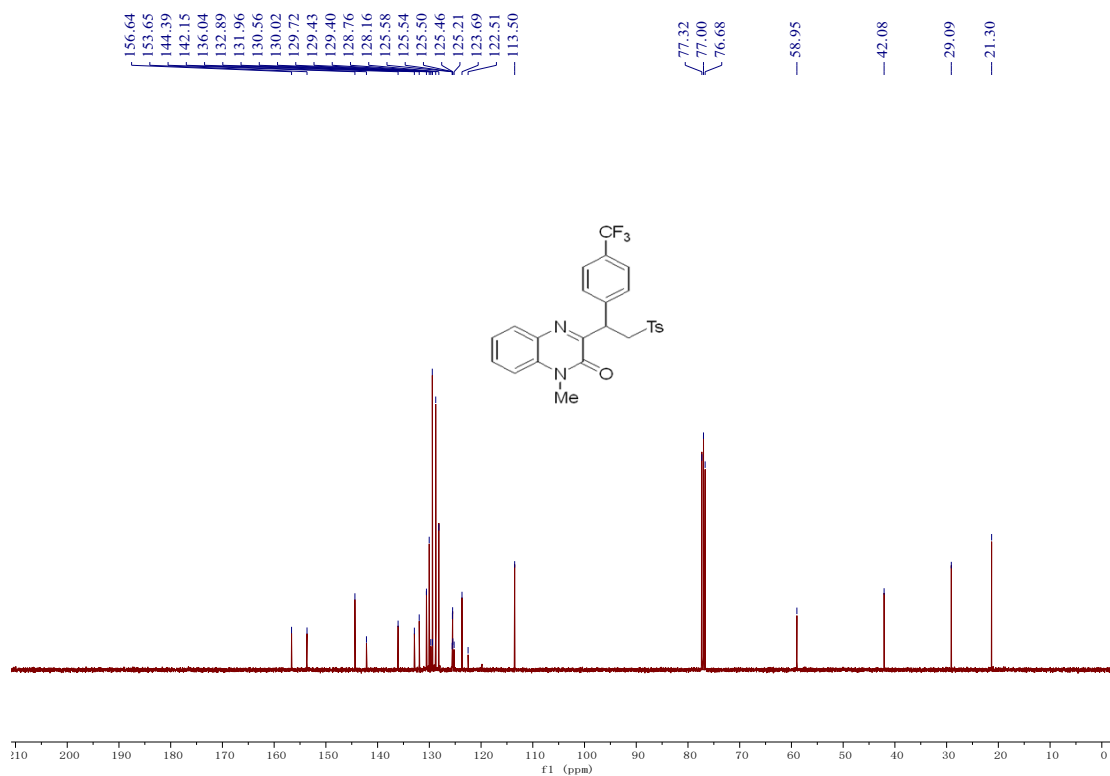

<sup>13</sup>C spectra of **4i**

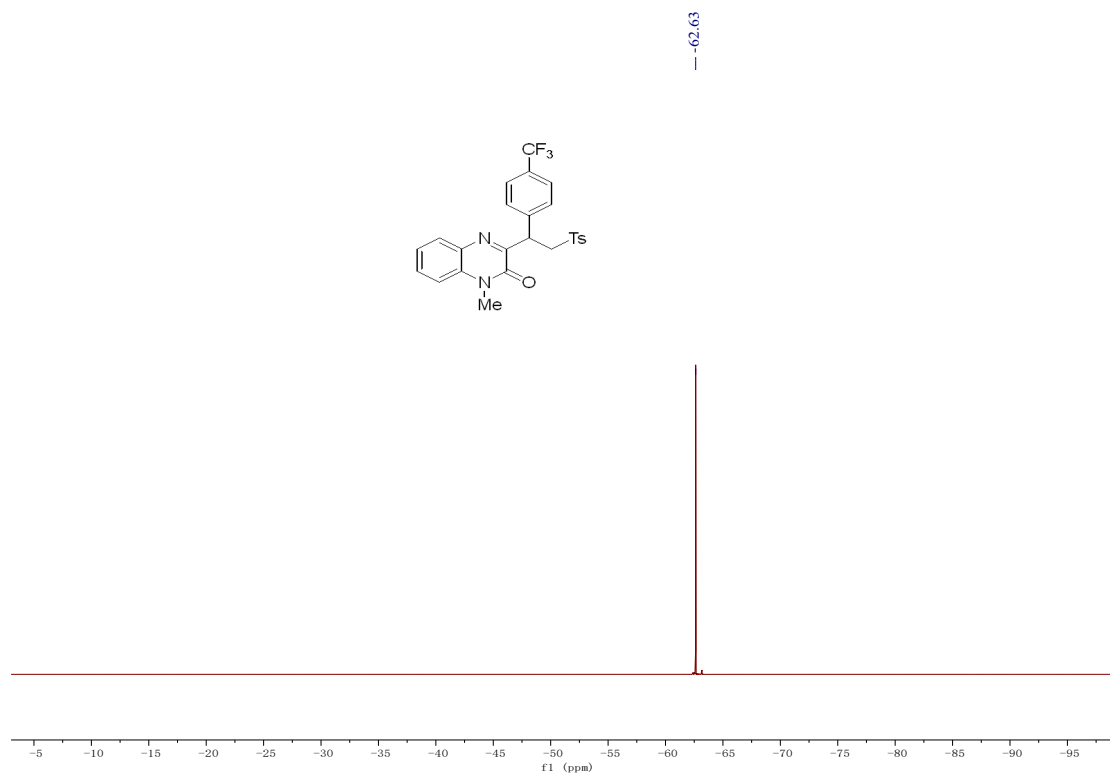

<sup>19</sup>F spectra of **4i**



**1-methyl-3-(1-(4-nitrophenyl)-2-tosylethyl)quinoxalin-2(1H)-one (4j)**

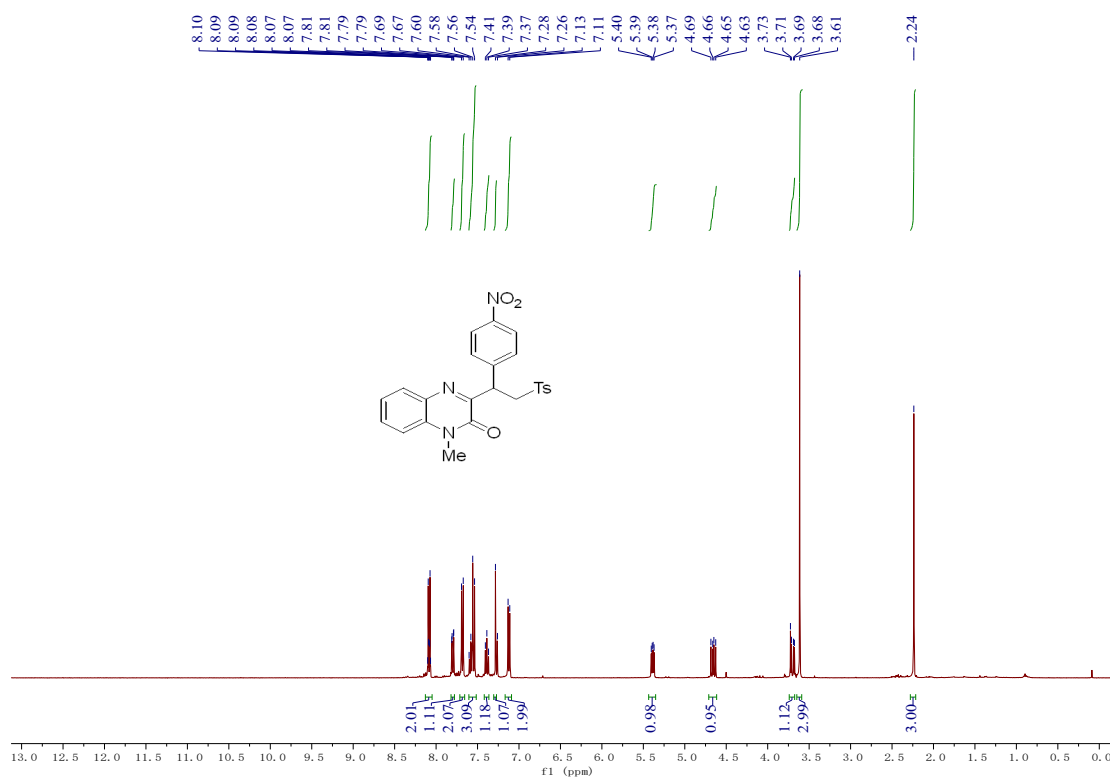

**<sup>1</sup>H spectra of 4j**

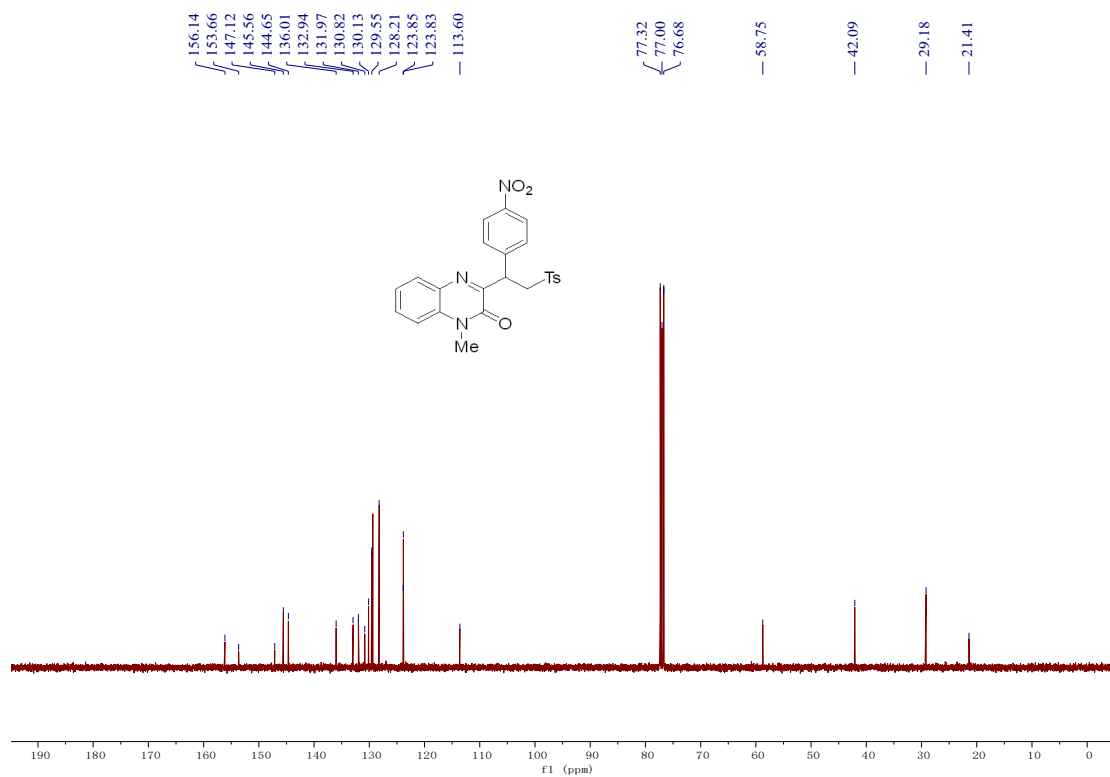

**<sup>13</sup>C spectra of 4j**

**3-(1-(2-chlorophenyl)-2-tosylethyl)-1-methylquinoxalin-2(1H)-one (4k)**

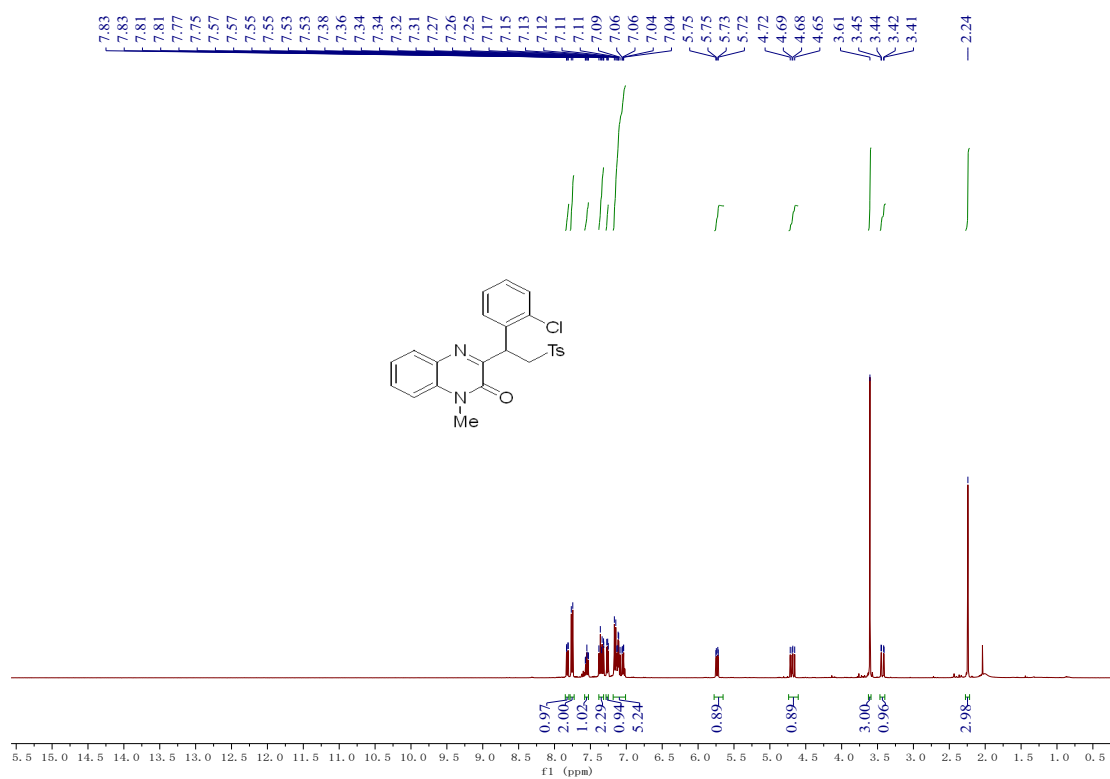

<sup>1</sup>H spectra of 4k

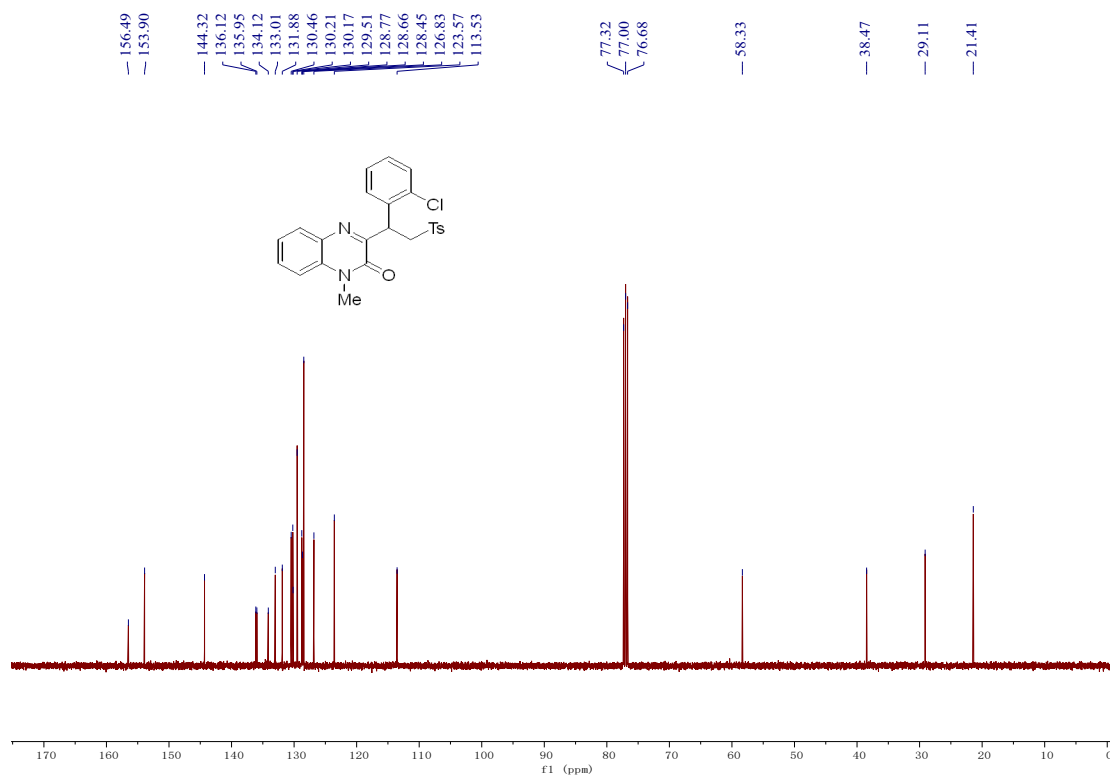

<sup>13</sup>C spectra of 4k

**3-(1-(3-bromophenyl)-2-tosylethyl)-1-methylquinoxalin-2(1H)-one (4I)**

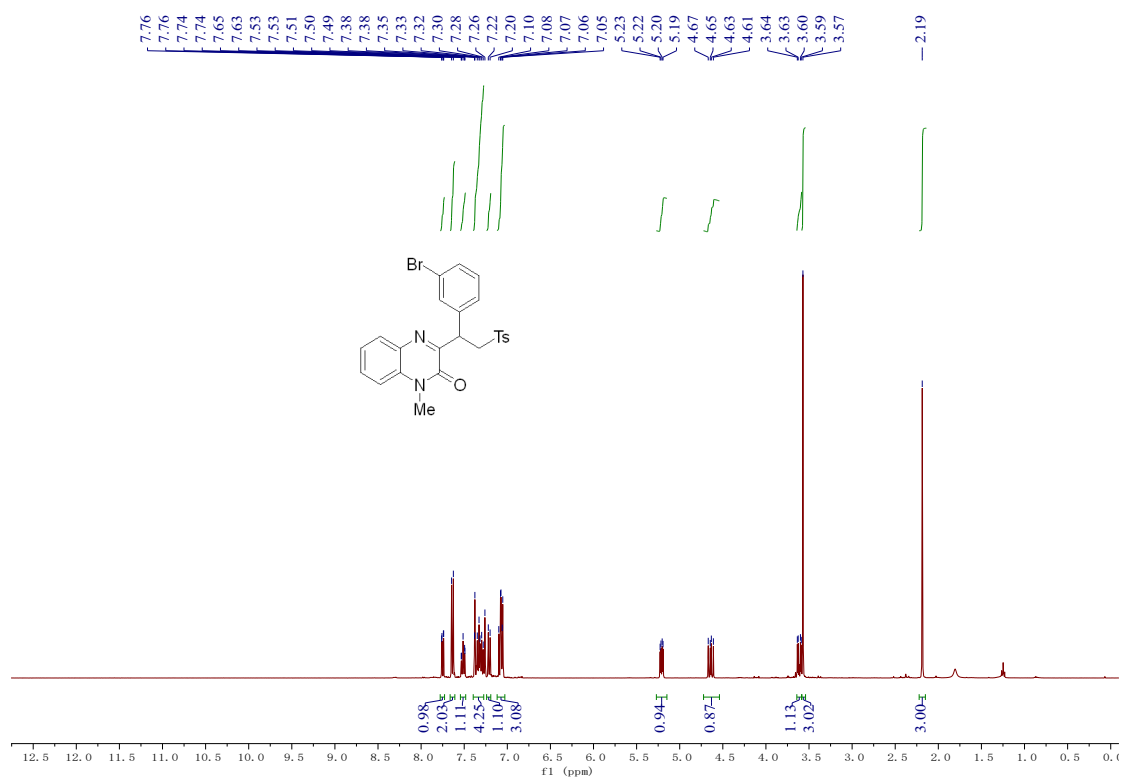

<sup>1</sup>H spectra of 4I

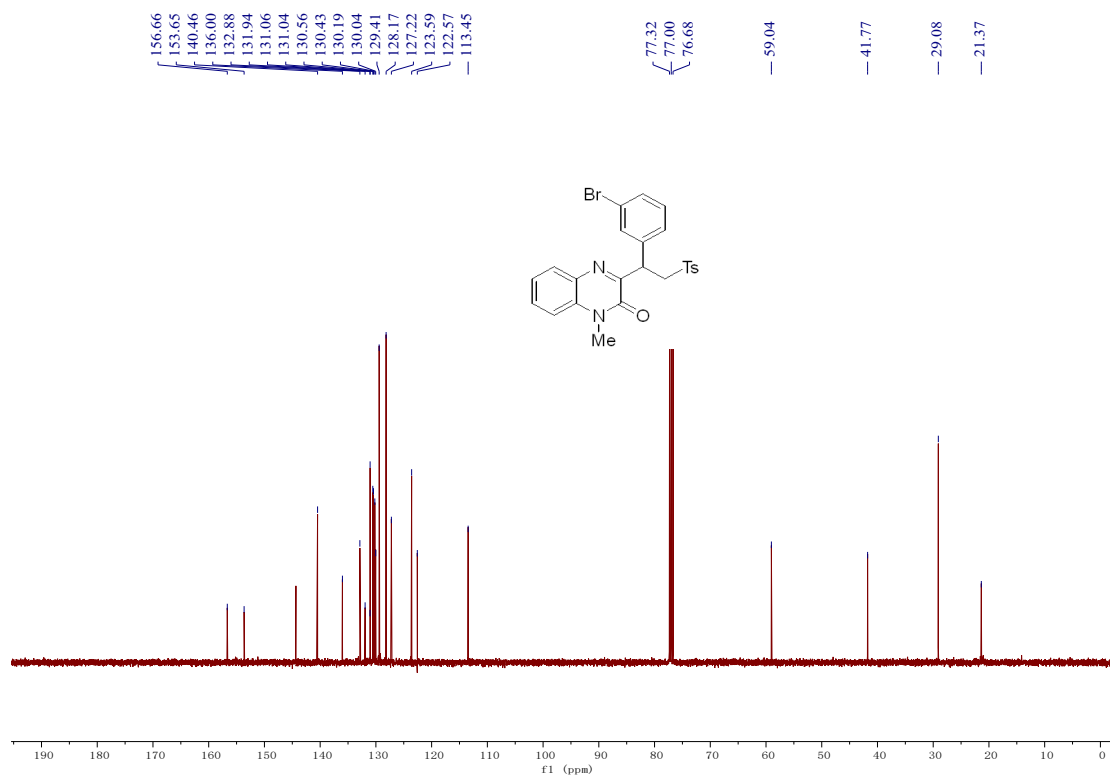

<sup>13</sup>C spectra of 4I

**1-methyl-3-(1-tosyloctan-2-yl)quinoxalin-2(1H)-one (4m)**

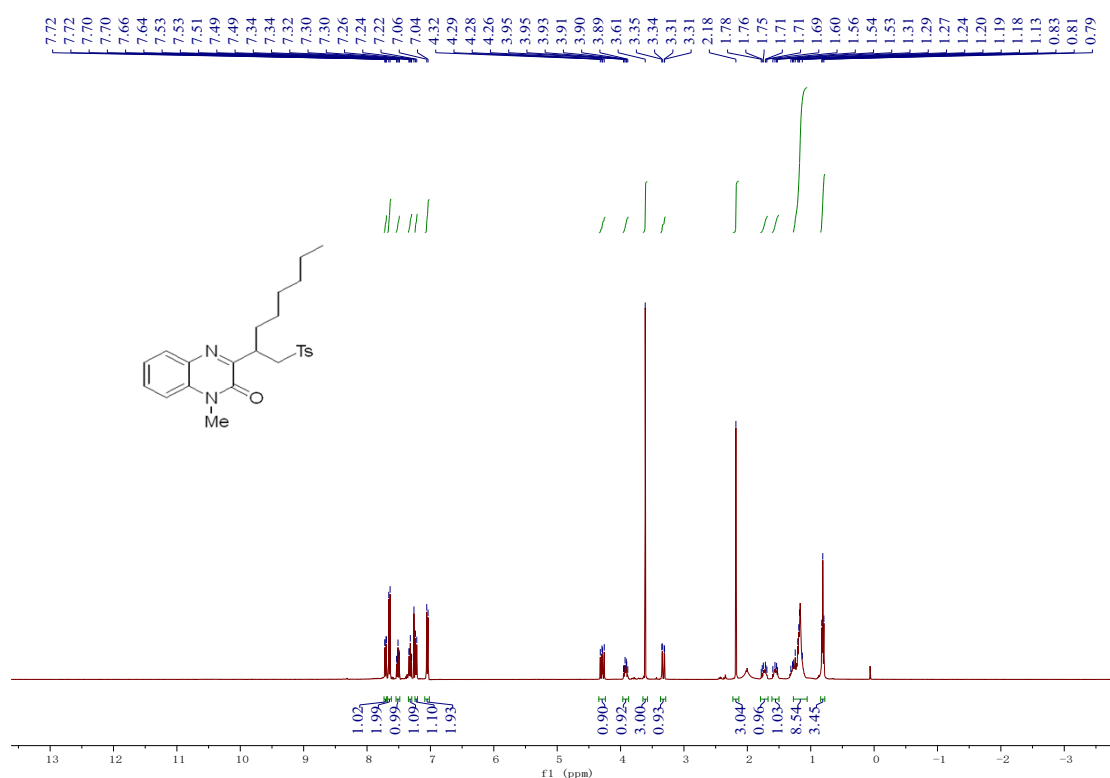

<sup>1</sup>H spectra of 4m

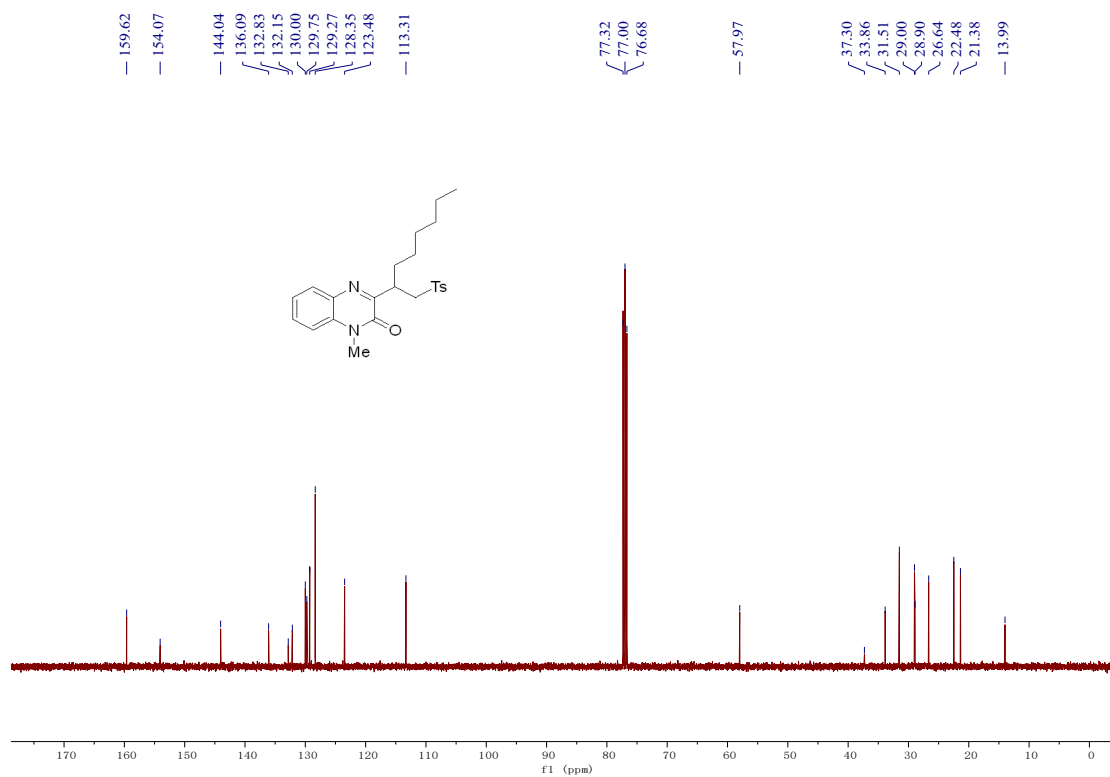

<sup>13</sup>C spectra of 4m

3,7-dimethyloct-6-en-1-yl 4-(1-(4-methyl-3-oxo-3,4-dihydroquinoxalin-2-yl)-2-tosylethyl)benzoate

(4n)

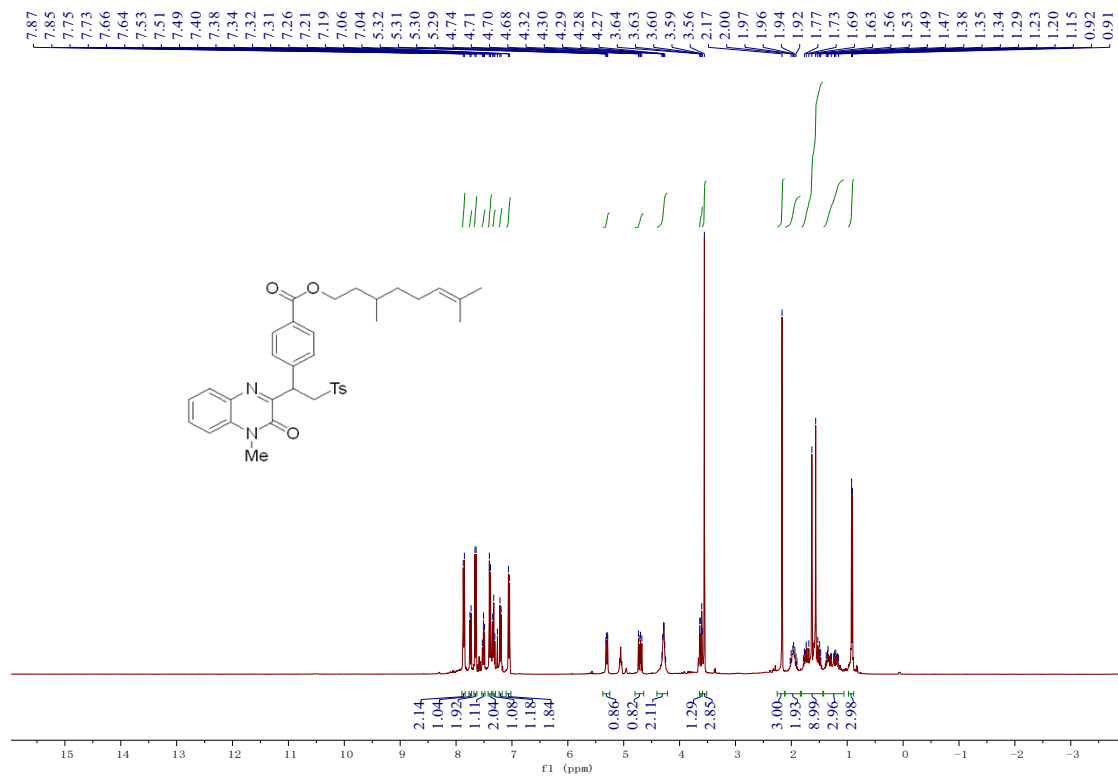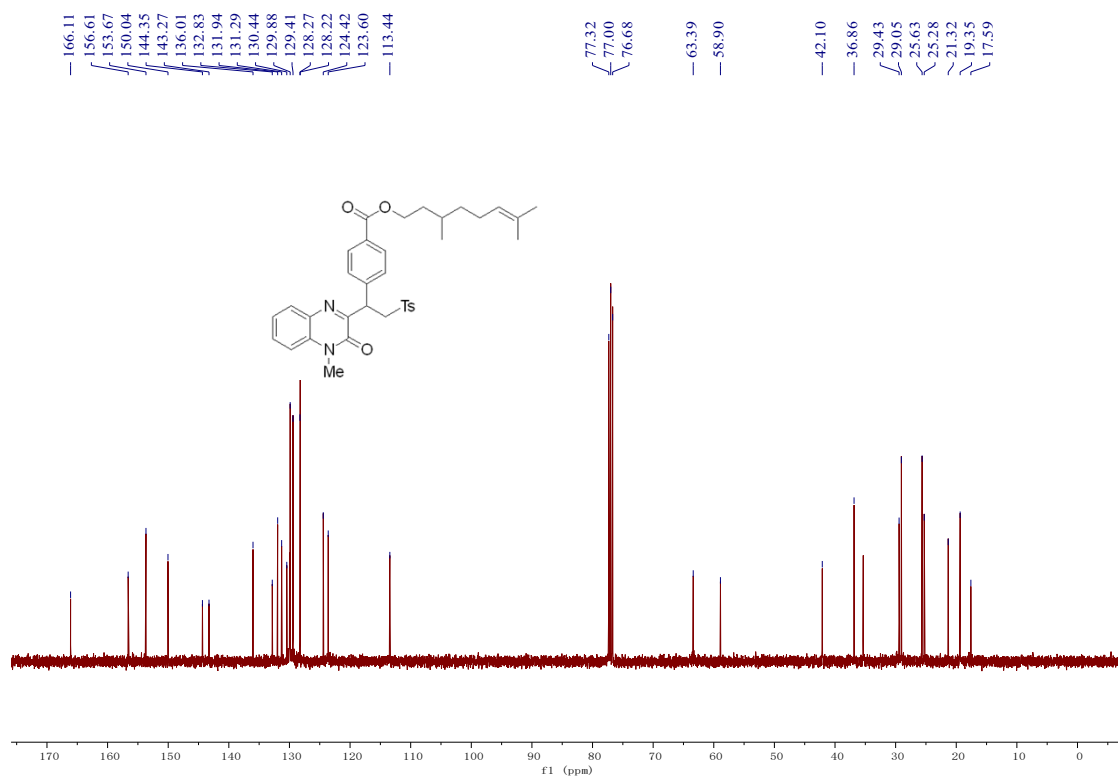

**1-methyl-3-(4-phenyl-1-tosylbutan-2-yl)quinoxalin-2(1H)-one (4o)**

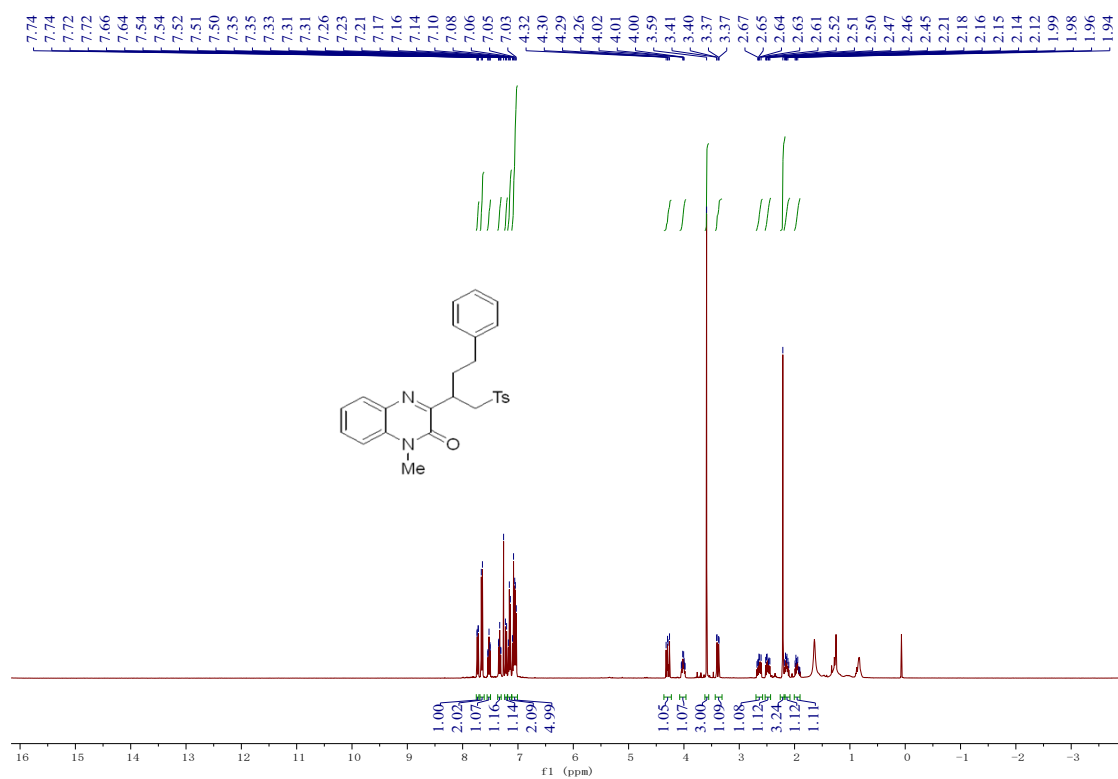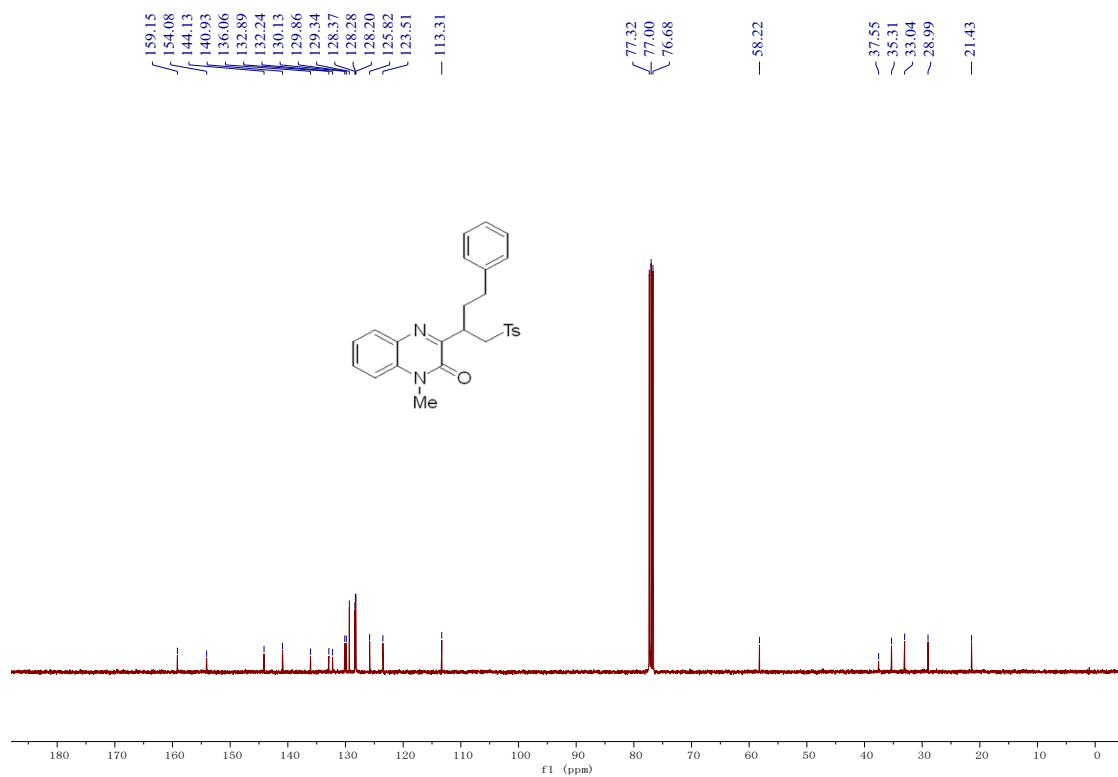

**1-methyl-3-(2-tosyl-2,3-dihydro-1H-inden-1-yl)quinoxalin-2(1H)-one (4p)**

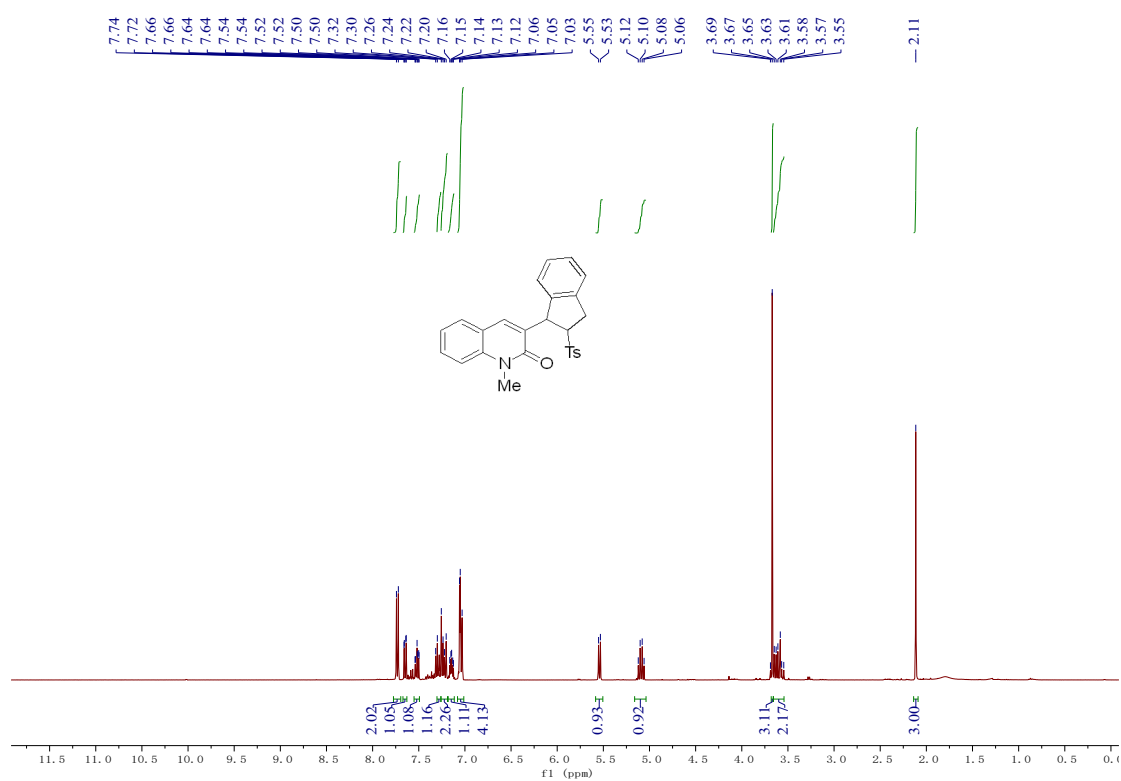

<sup>1</sup>H spectra of 4p

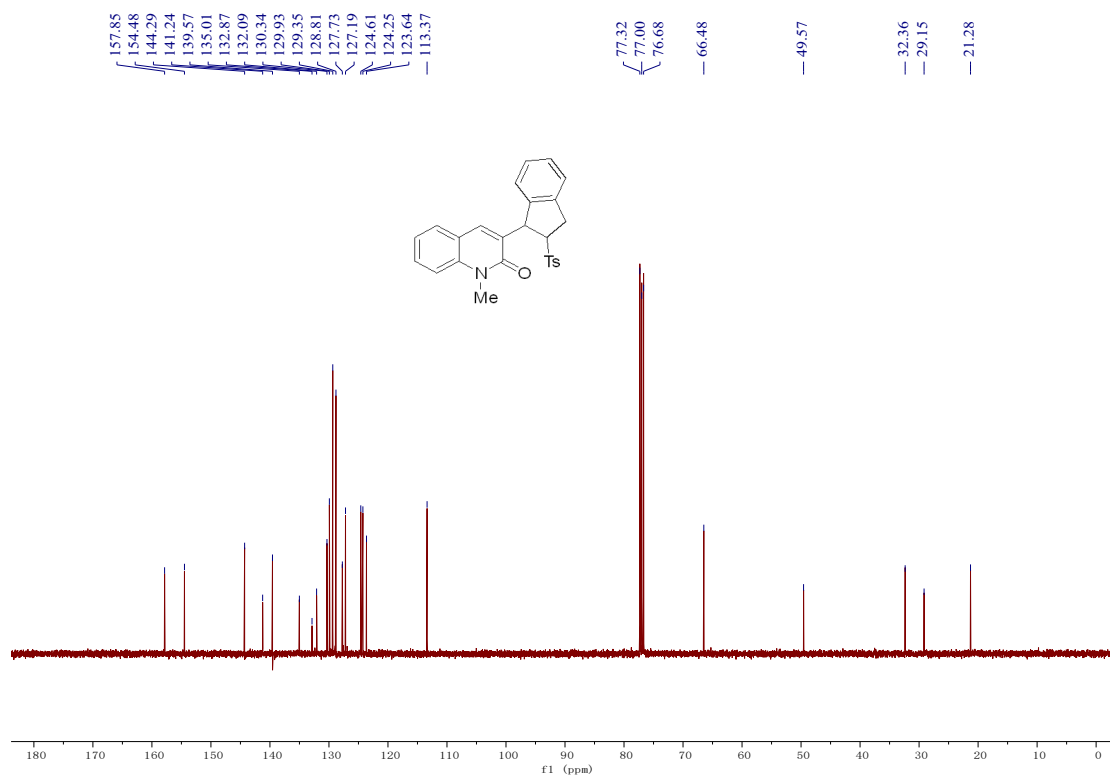

<sup>13</sup>C spectra of 4p

**1-ethyl-3-(1-phenyl-2-tosylethyl)quinoxalin-2(1H)-one (5a)**

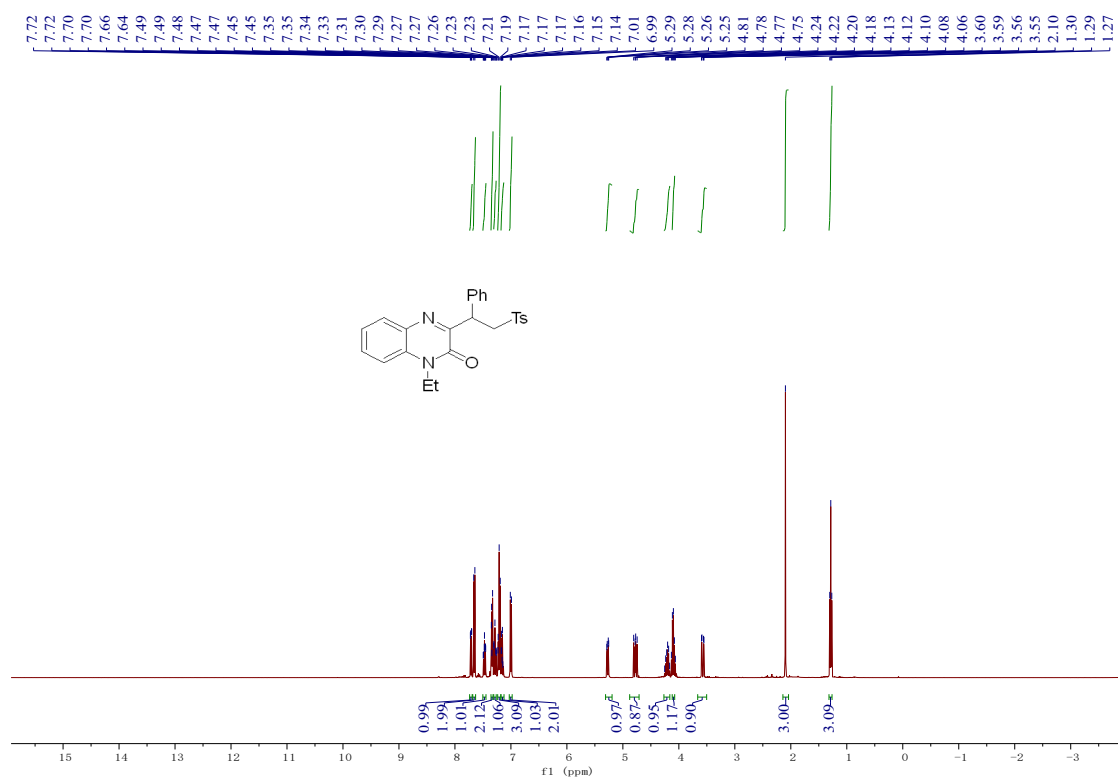

<sup>1</sup>H spectra of 5a

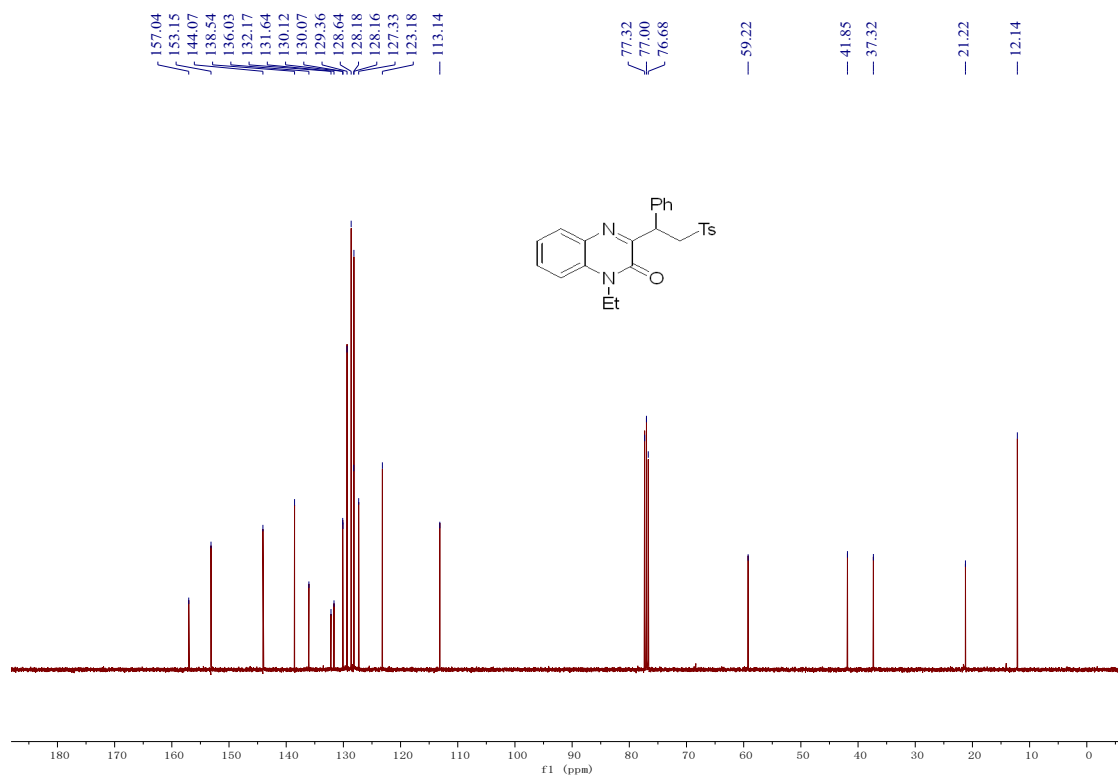

<sup>13</sup>C spectra of 5a



**1-allyl-3-(1-phenyl-2-tosylethyl)quinoxalin-2(1H)-one (5b)**

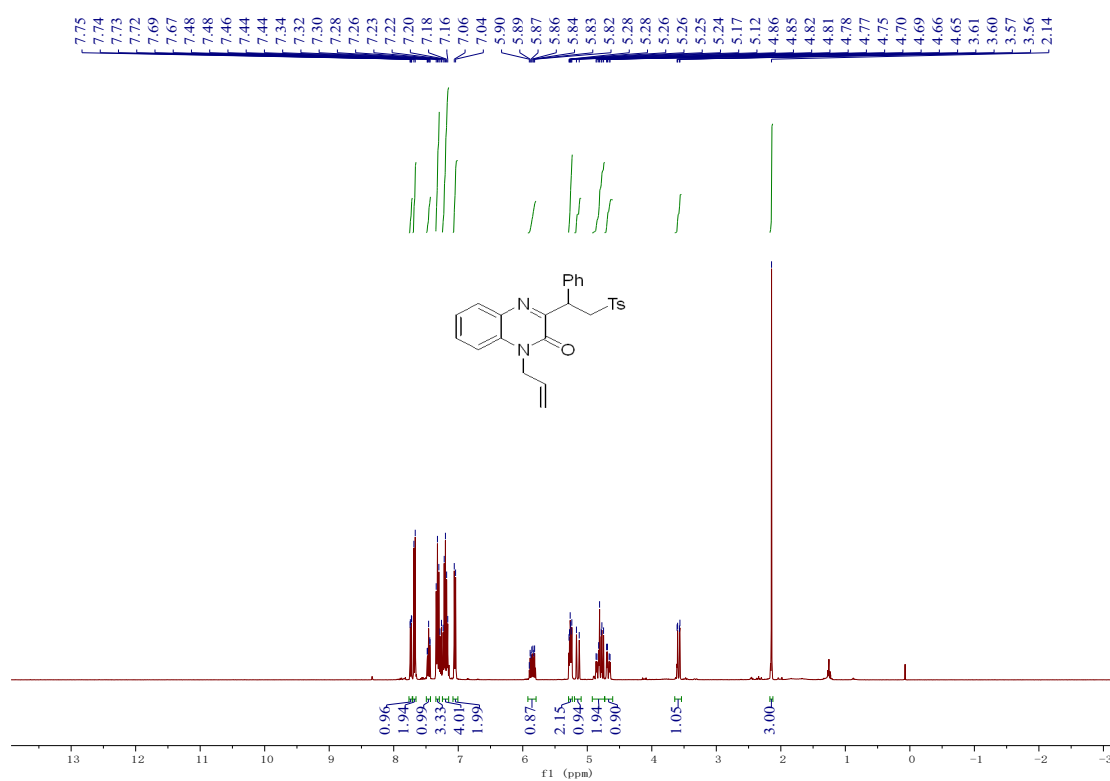

**<sup>1</sup>H spectra of 5b**

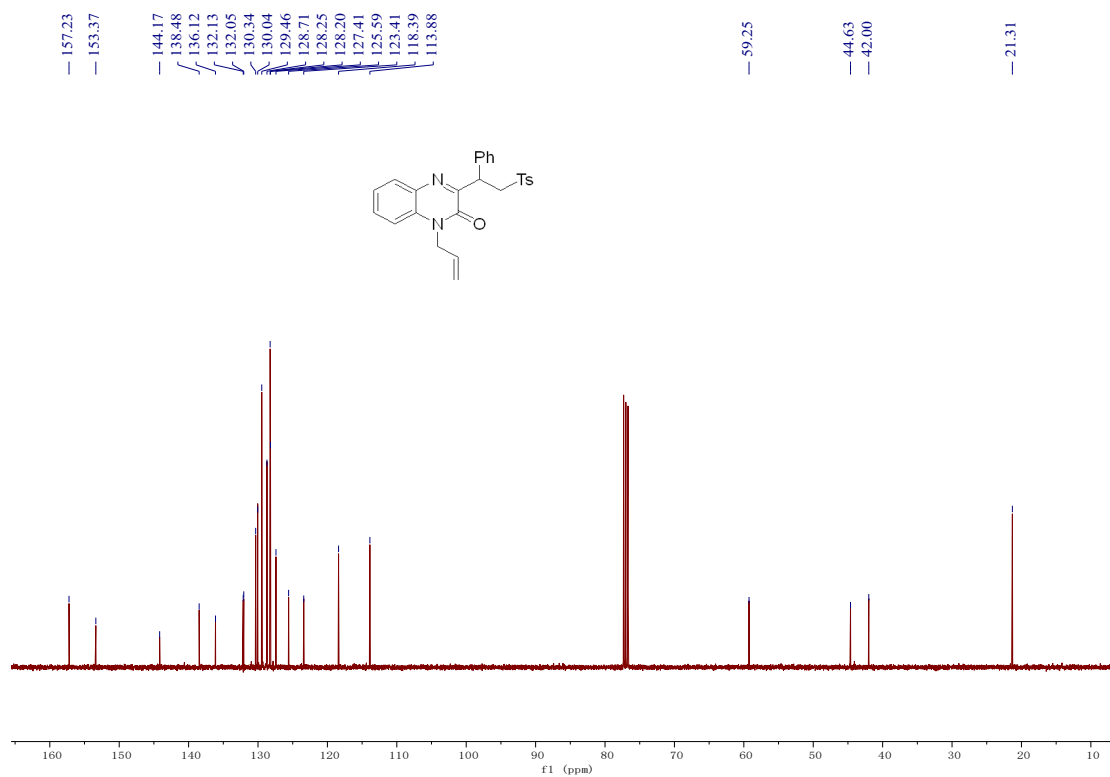

**<sup>13</sup>C spectra of 5b**

**3-(1-phenyl-2-tosylethyl)-1-(prop-2-yn-1-yl)quinoxalin-2(1H)-one (5c)**

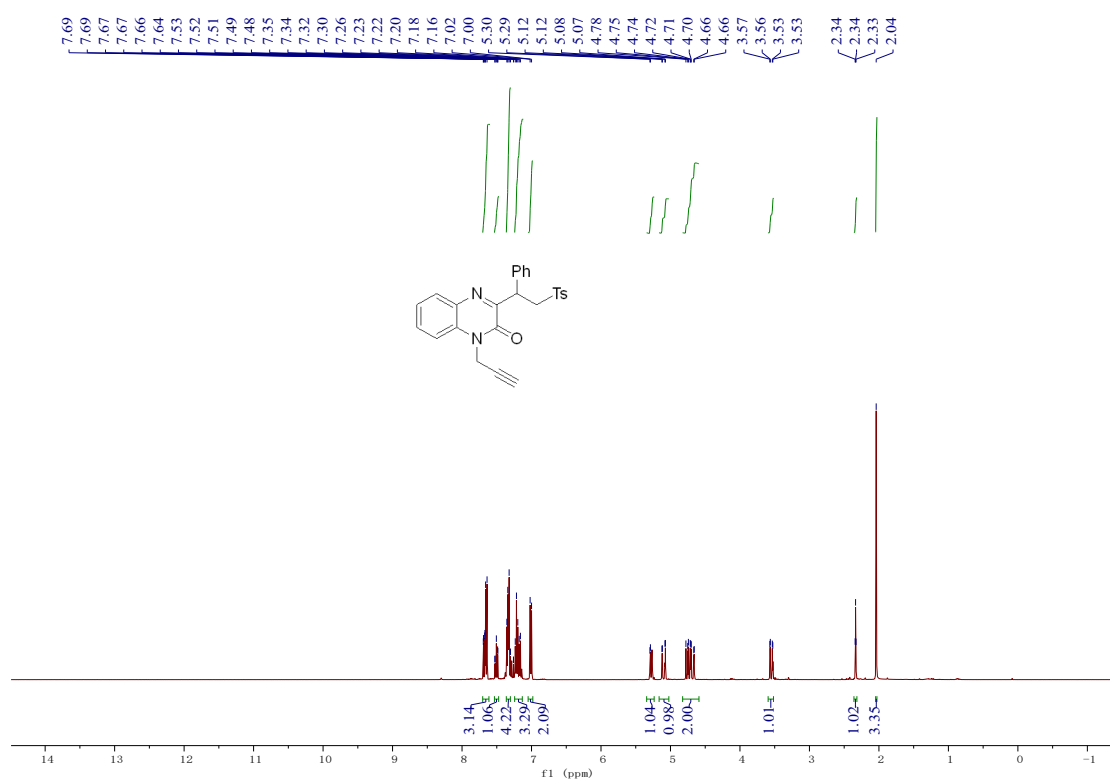

<sup>1</sup>H spectra of 5c

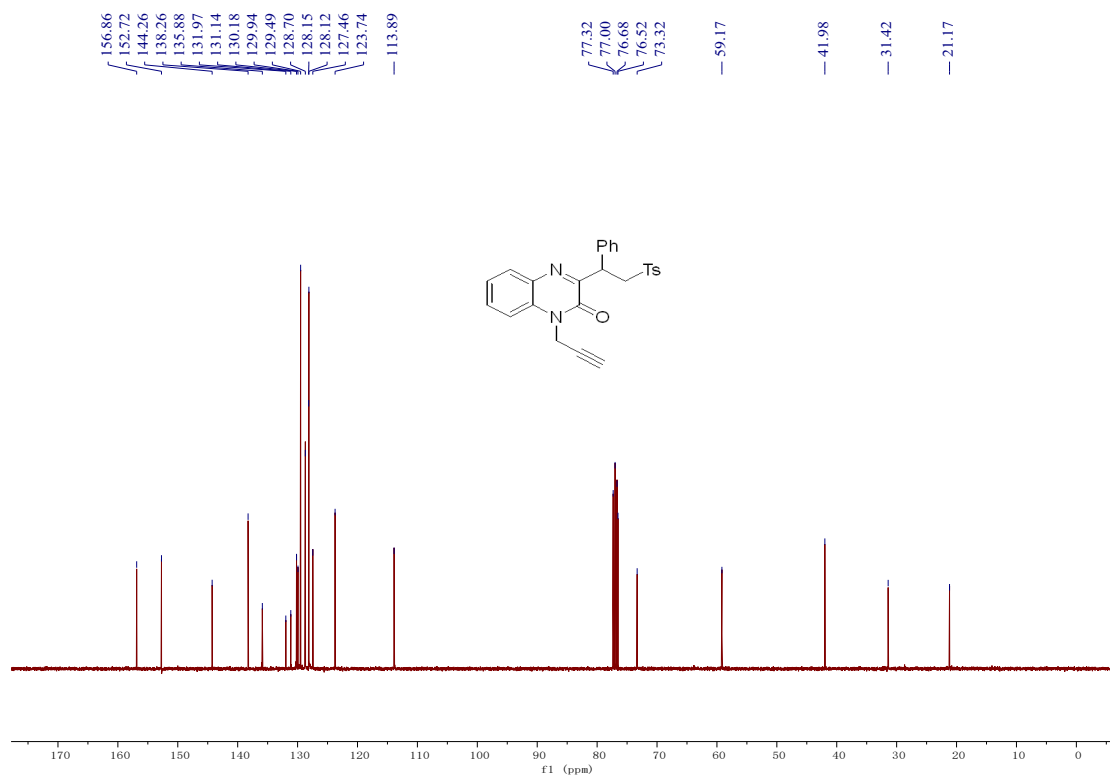

<sup>13</sup>C spectra of 5c

**5-chloro-1-methyl-3-(1-phenyl-2-tosylethyl)quinoxalin-2(1H)-one (5d)**

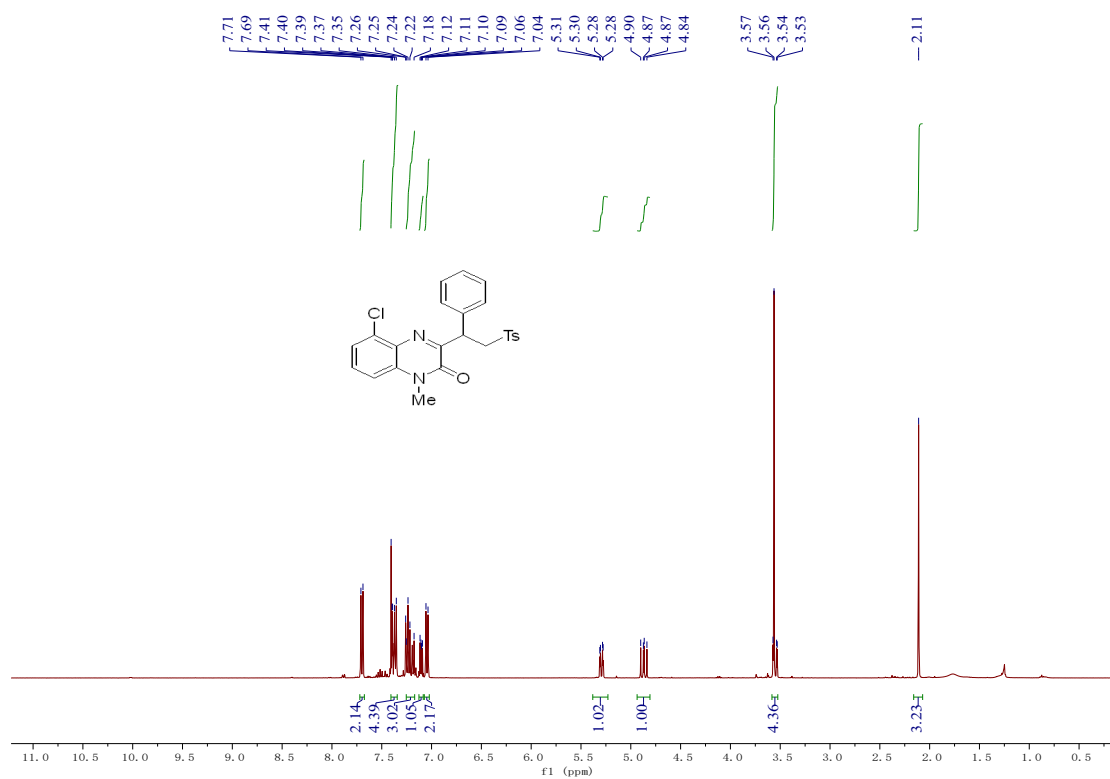

<sup>1</sup>H spectra of 5d

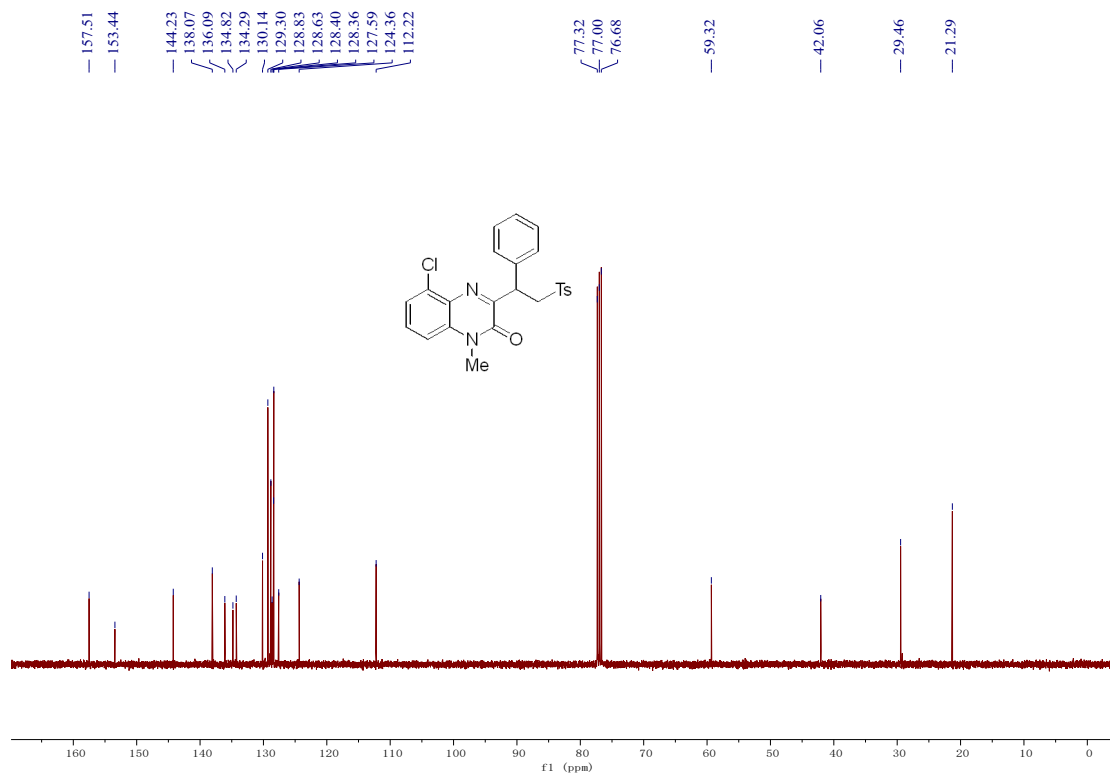

<sup>13</sup>C spectra of 5d

**6-fluoro-1-methyl-3-(1-phenyl-2-tosylethyl)quinoxalin-2(1H)-one (5e)**

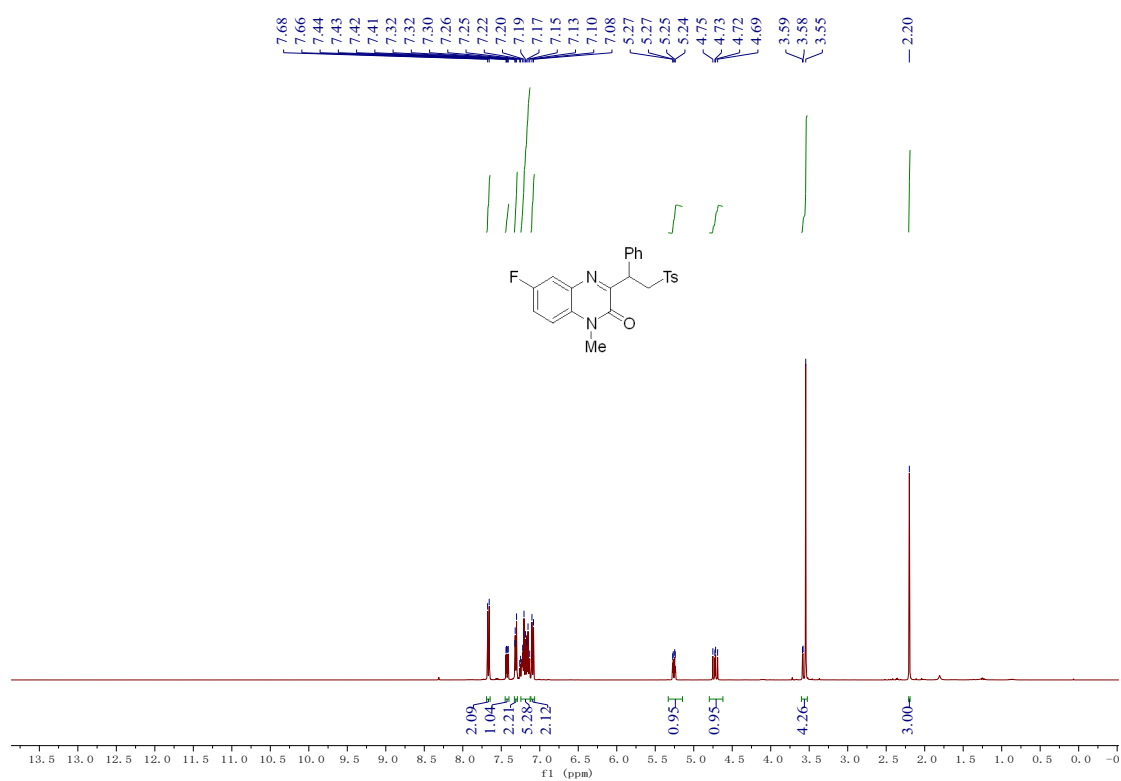

**<sup>1</sup>H spectra of 5e**

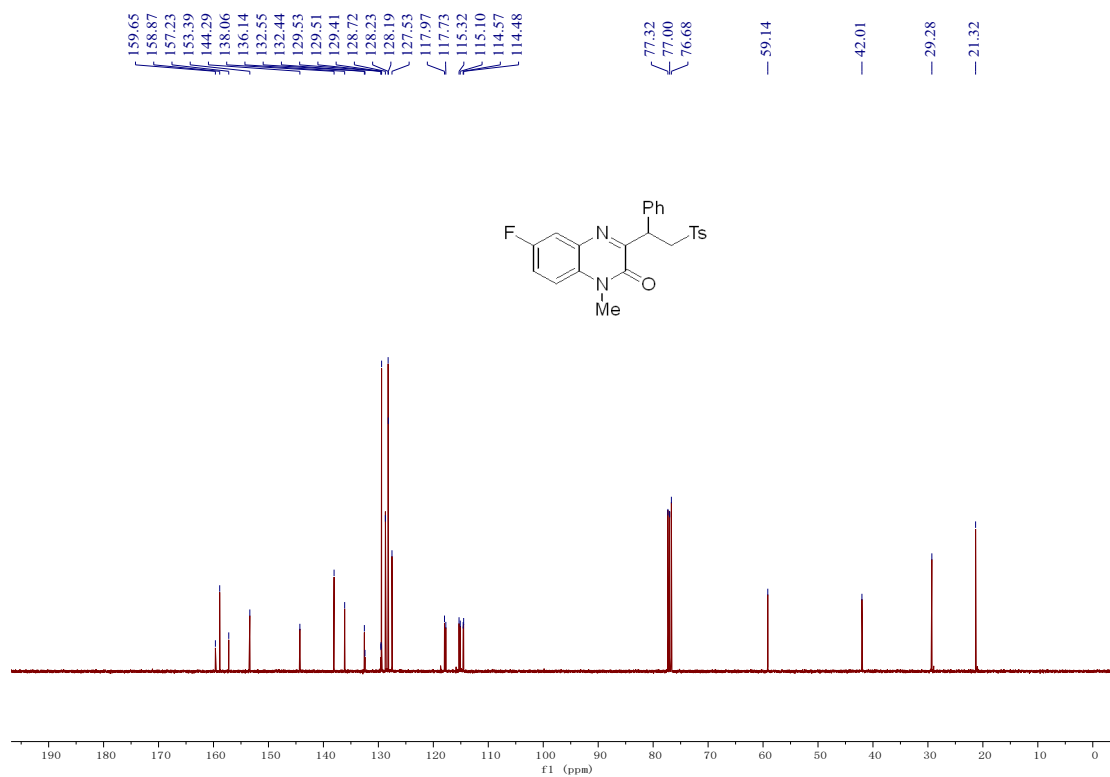

**<sup>13</sup>C spectra of 5e**

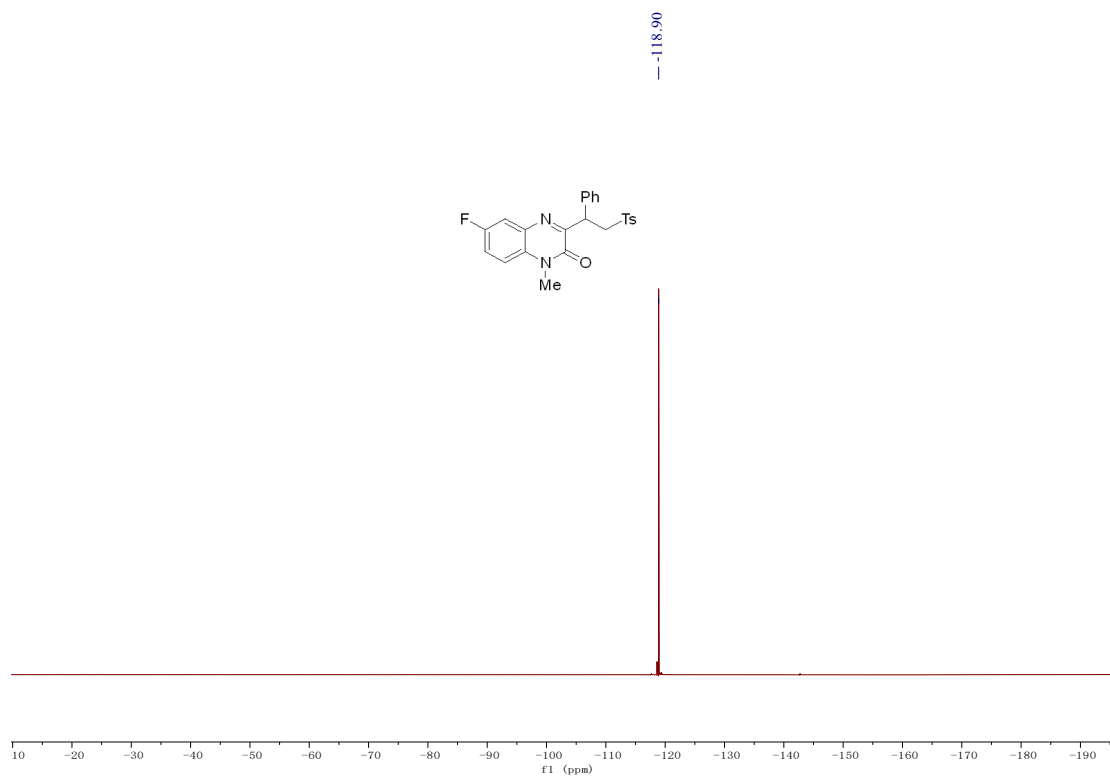

$^{19}\text{F}$  spectra of 5e

**6-chloro-1-methyl-3-(1-phenyl-2-tosylethyl)quinoxalin-2(1H)-one (5f)**

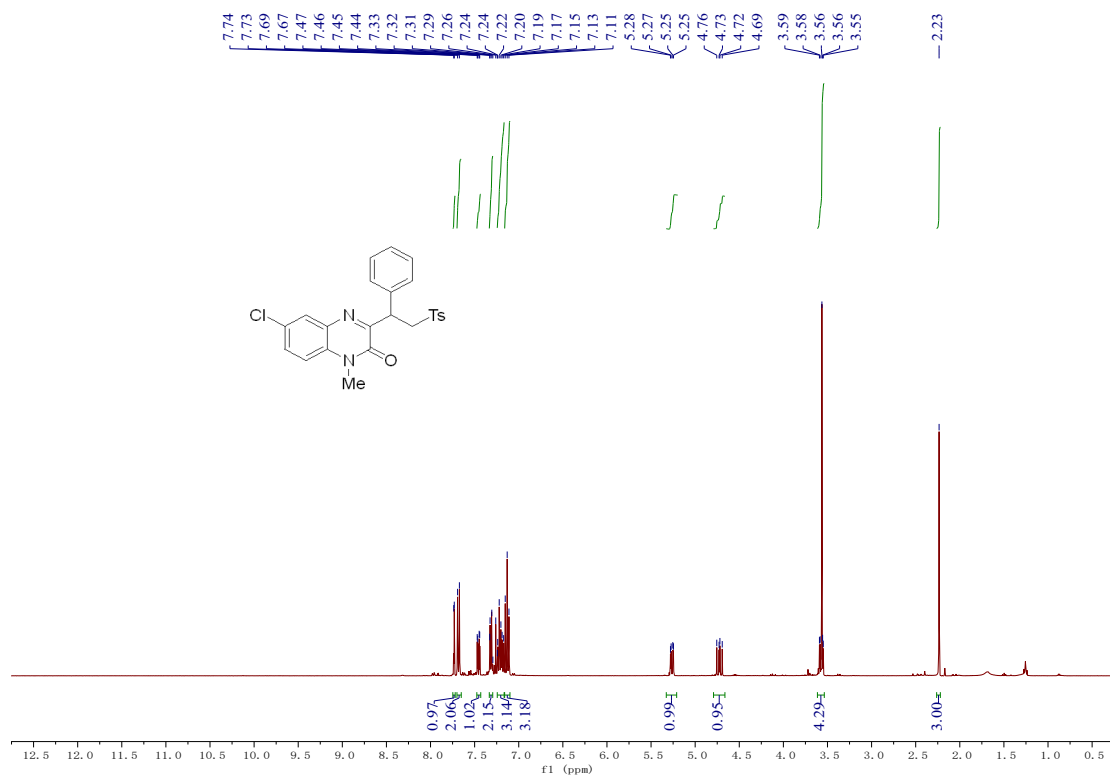

$^1\text{H}$  spectra of 5f

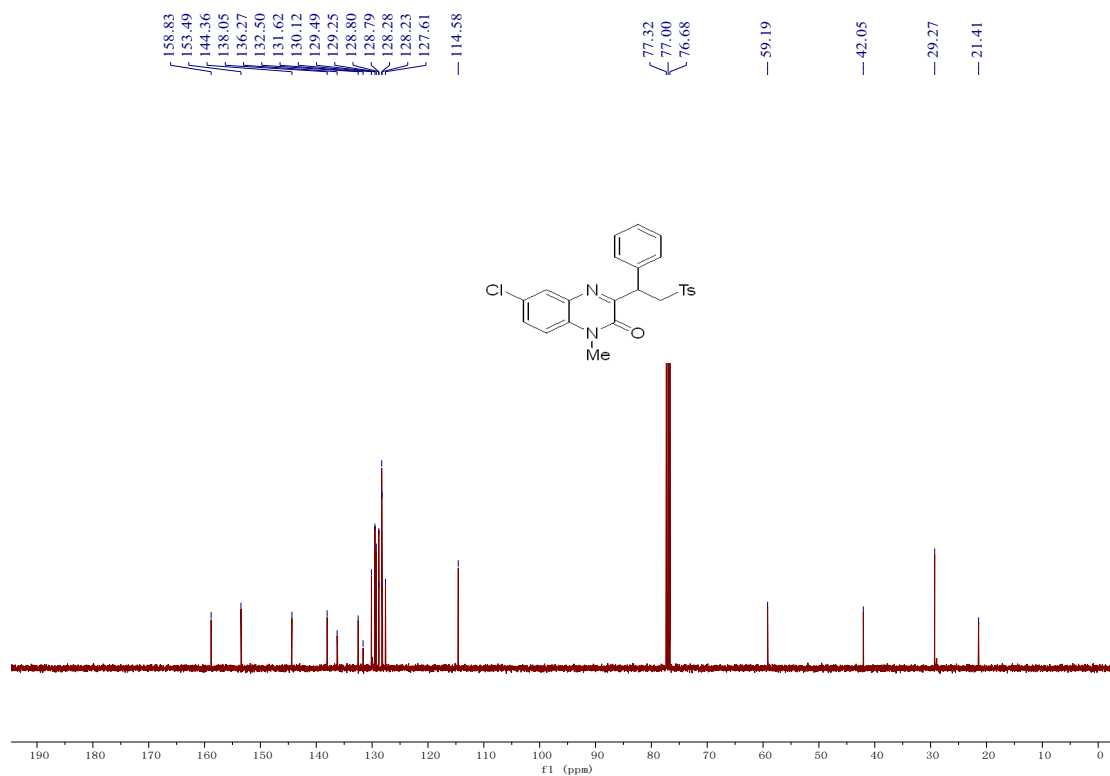

$^{13}\text{C}$  spectra of **5f**

**6-bromo-1-methyl-3-(1-phenyl-2-tosylethyl)quinoxalin-2(1H)-one (5g)**

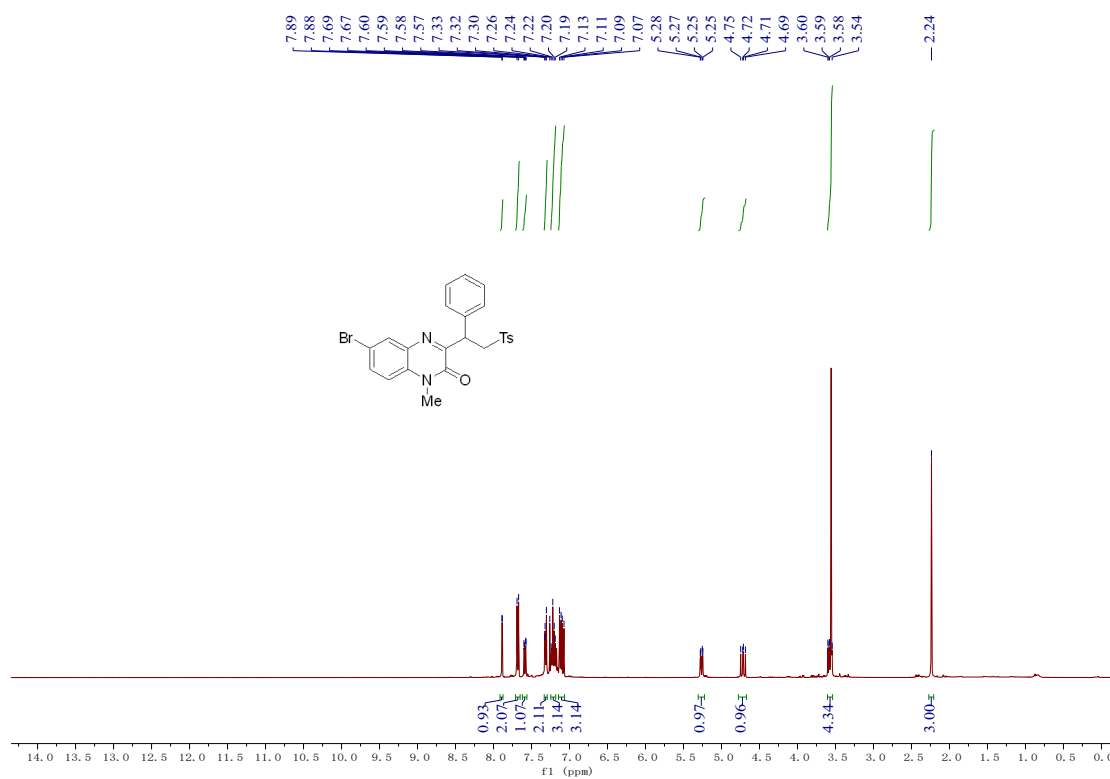

$^1\text{H}$  spectra of **5g**

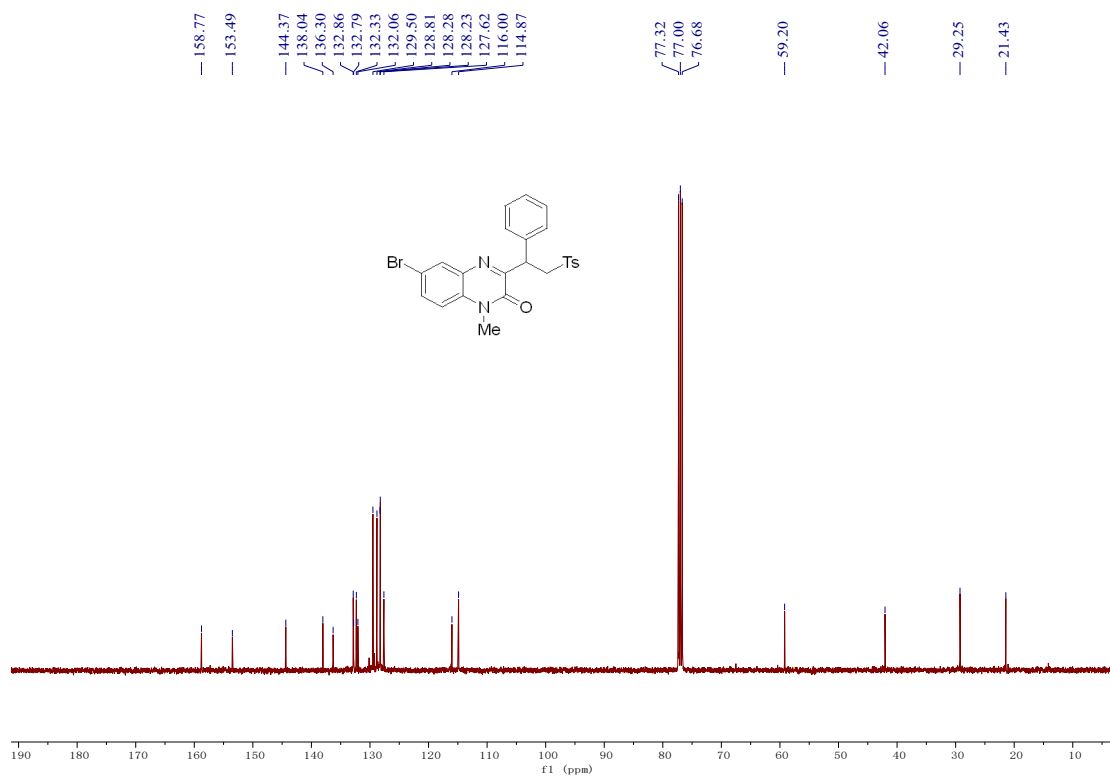

$^{13}\text{C}$  spectra of **5g**

**1-methyl-3-(1-phenyl-2-tosylethyl)-6-(trifluoromethyl)quinoxalin-2(1H)-one (5h)**

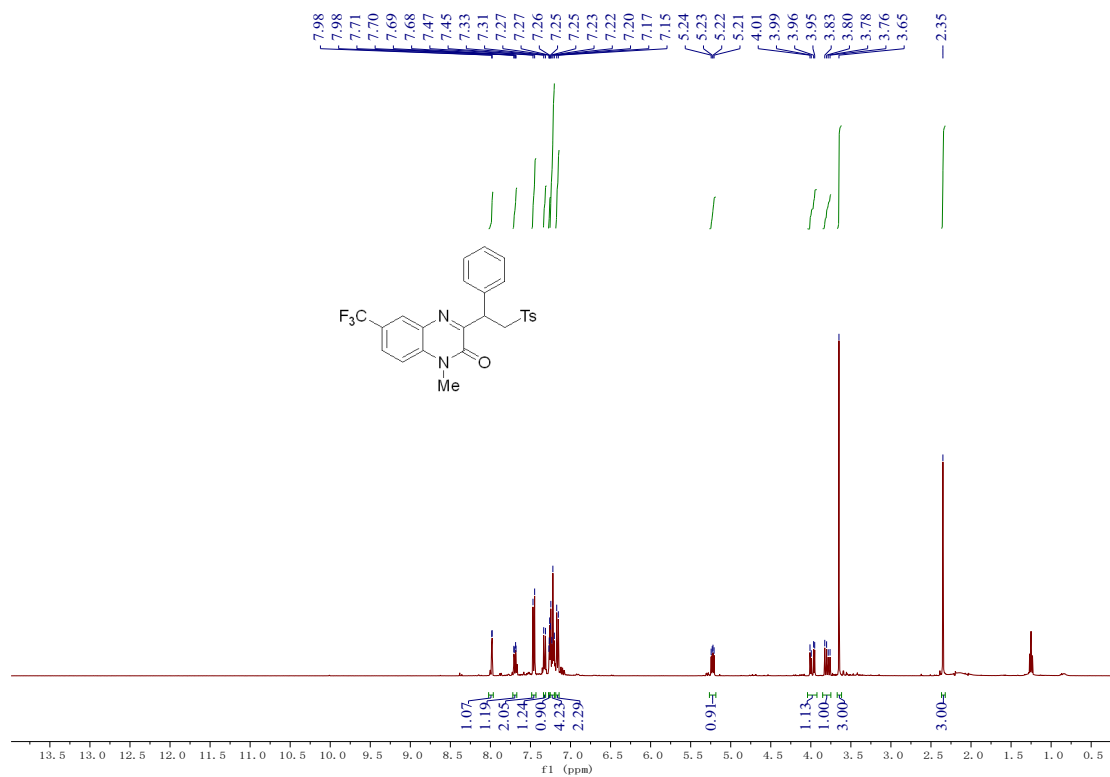

$^1\text{H}$  spectra of **5h**

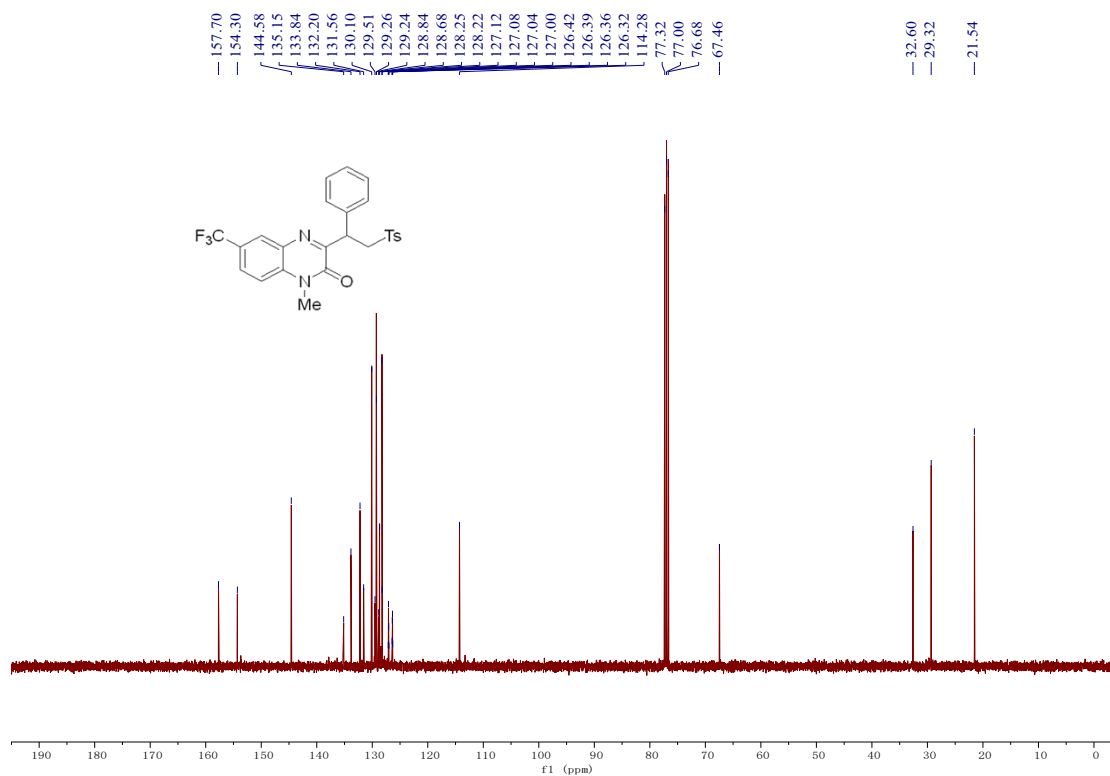

$^{13}\text{C}$  spectra of **5h**

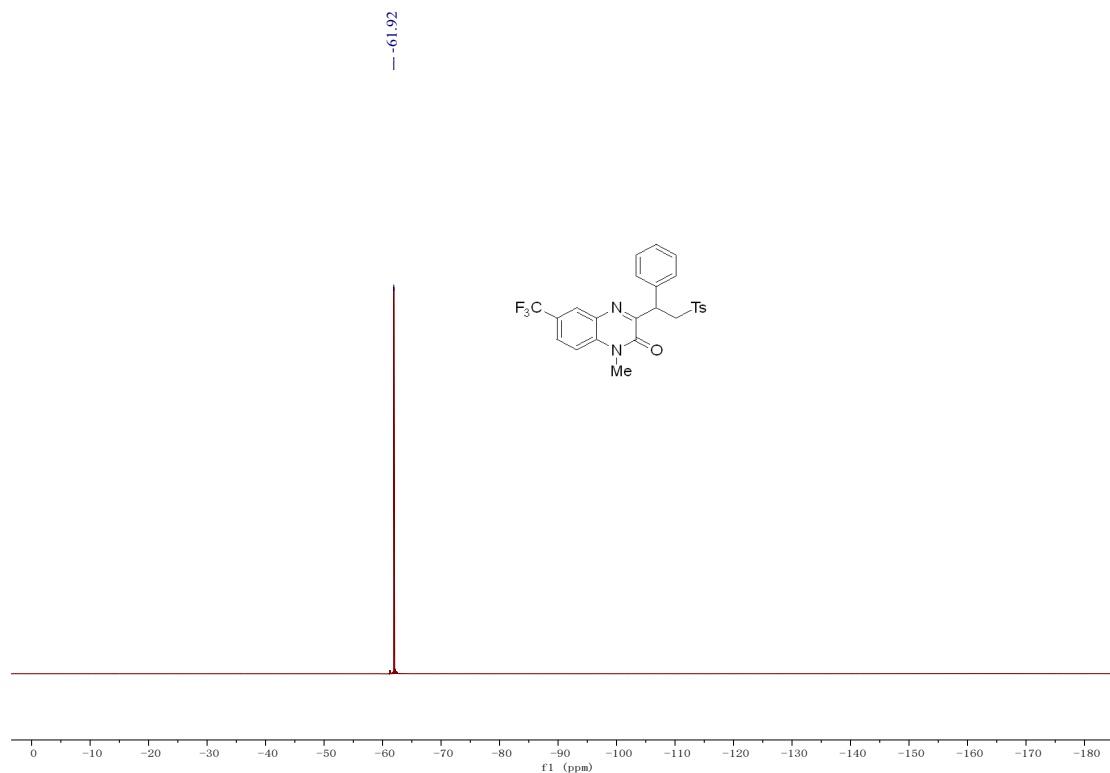

$^{19}\text{F}$  spectra of **5h**



**6-benzoyl-1-methyl-3-(1-phenyl-2-tosylethyl)quinoxalin-2(1H)-one (5i)**

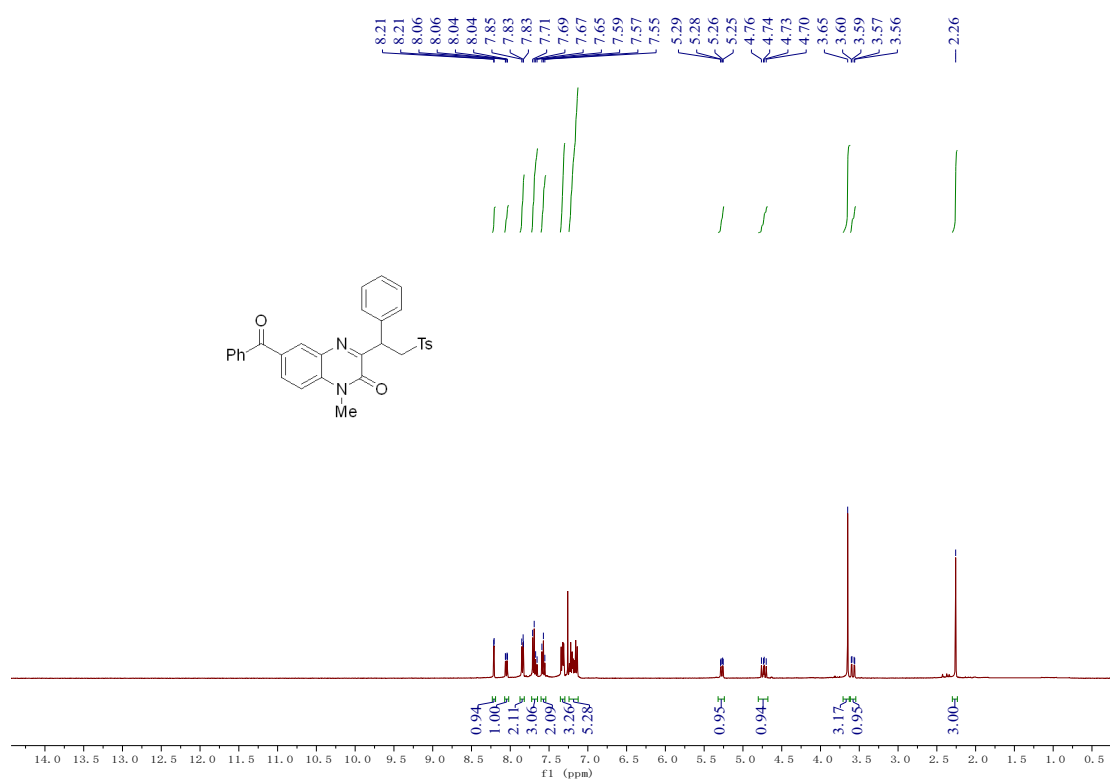

<sup>1</sup>H spectra of **5i**

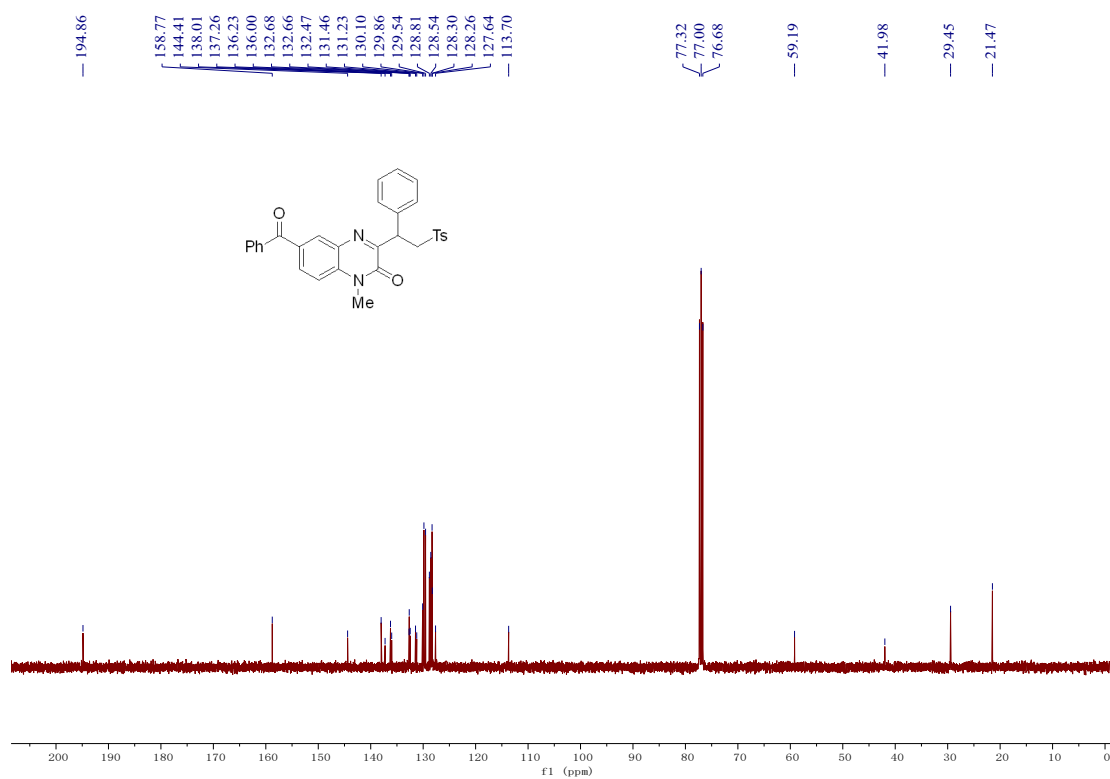

<sup>13</sup>C spectra of **5i**

**1,6,7-trimethyl-3-(1-phenyl-2-tosylethyl)quinoxalin-2(1H)-one (5j)**

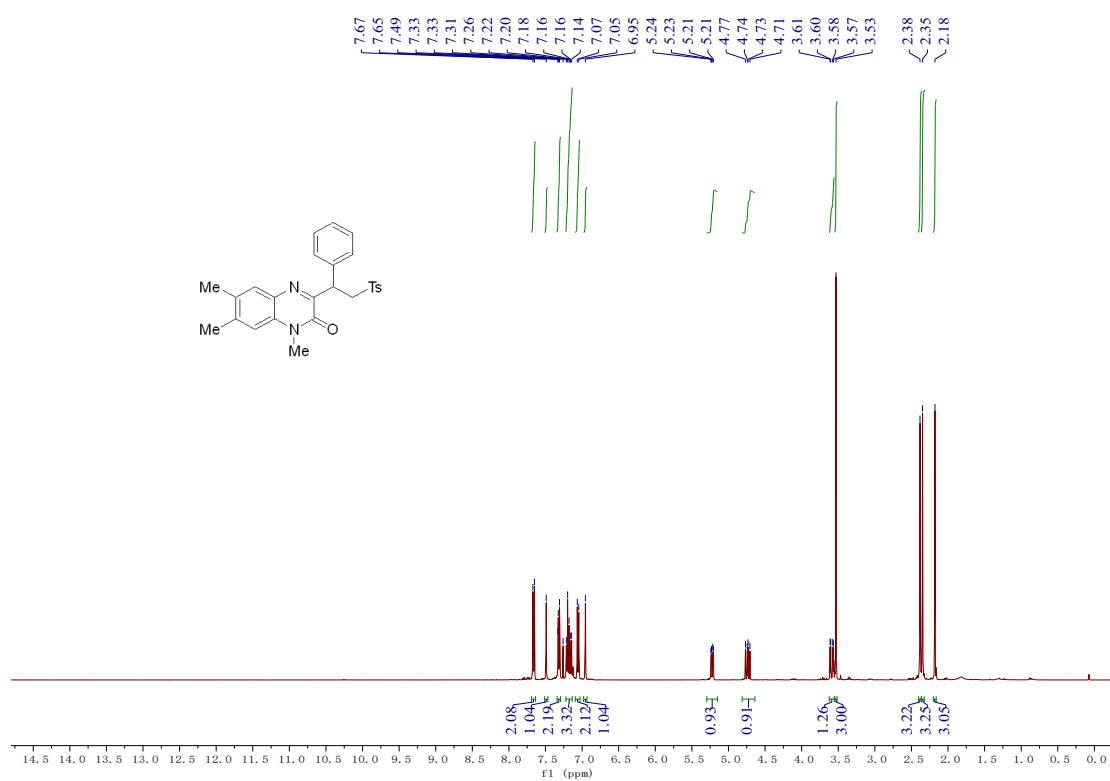

<sup>1</sup>H spectra of **5j**

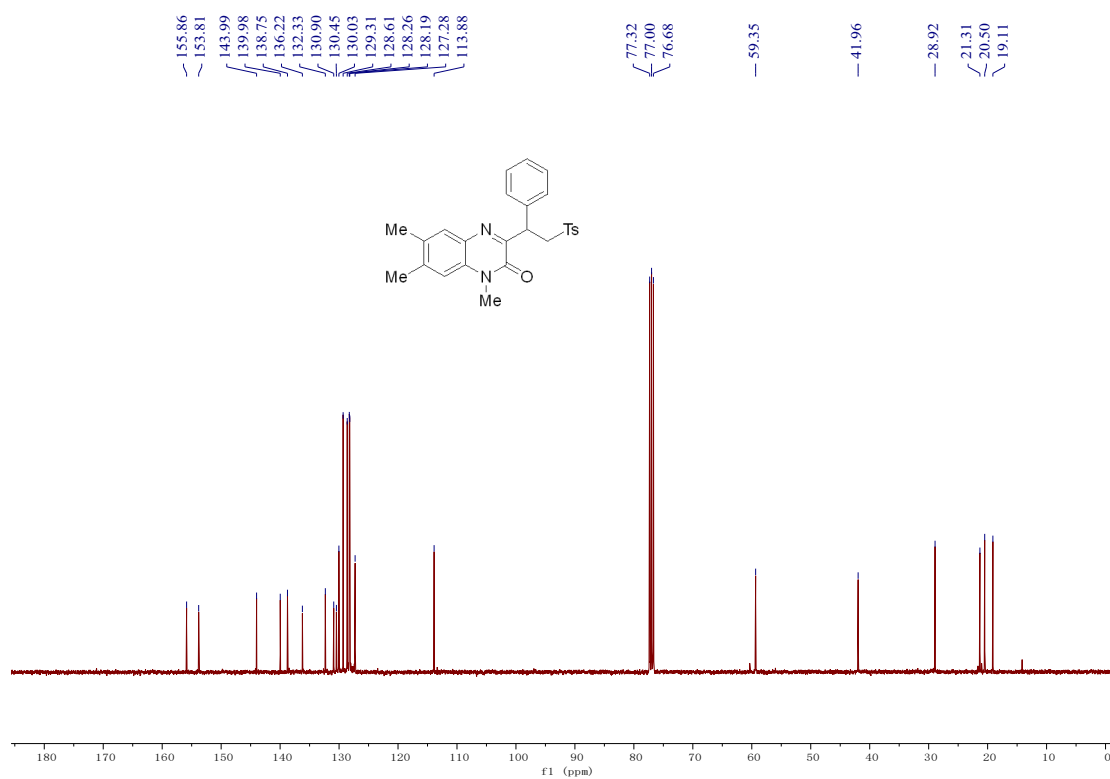

<sup>13</sup>C spectra of **5j**

**1-methyl-3-(1-phenyl-2-(phenylsulfonyl)ethyl)quinoxalin-2(1H)-one (5k)**

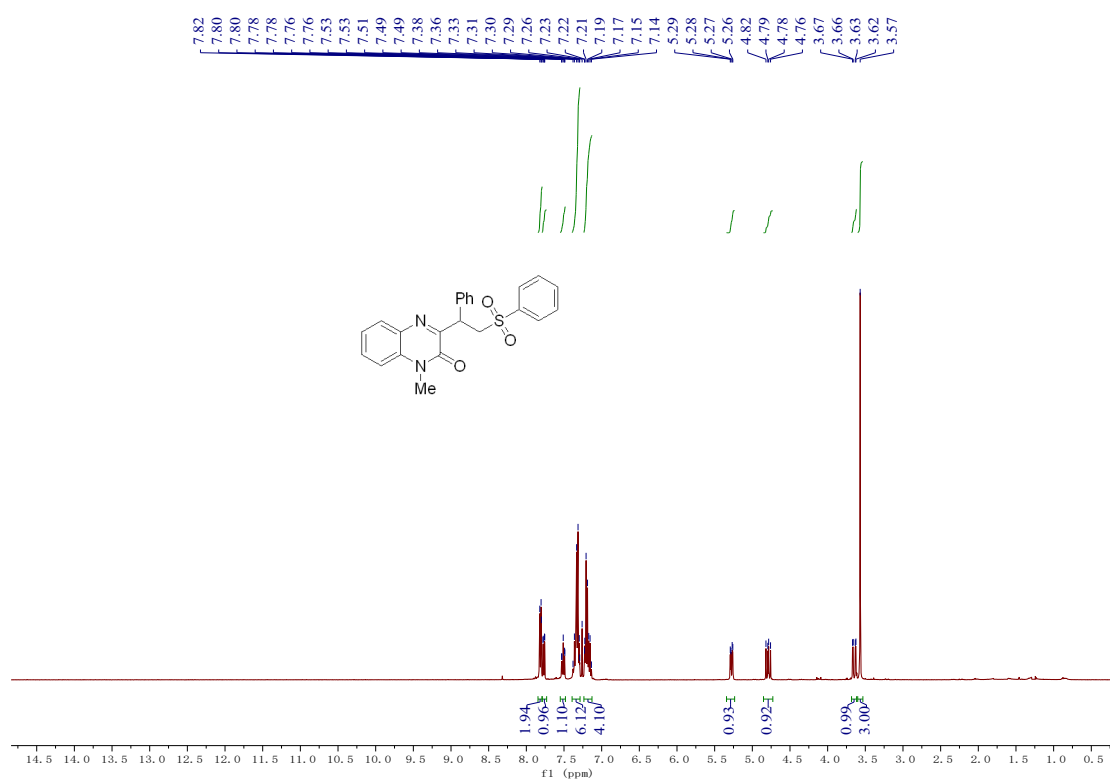

<sup>1</sup>H spectra of 5k

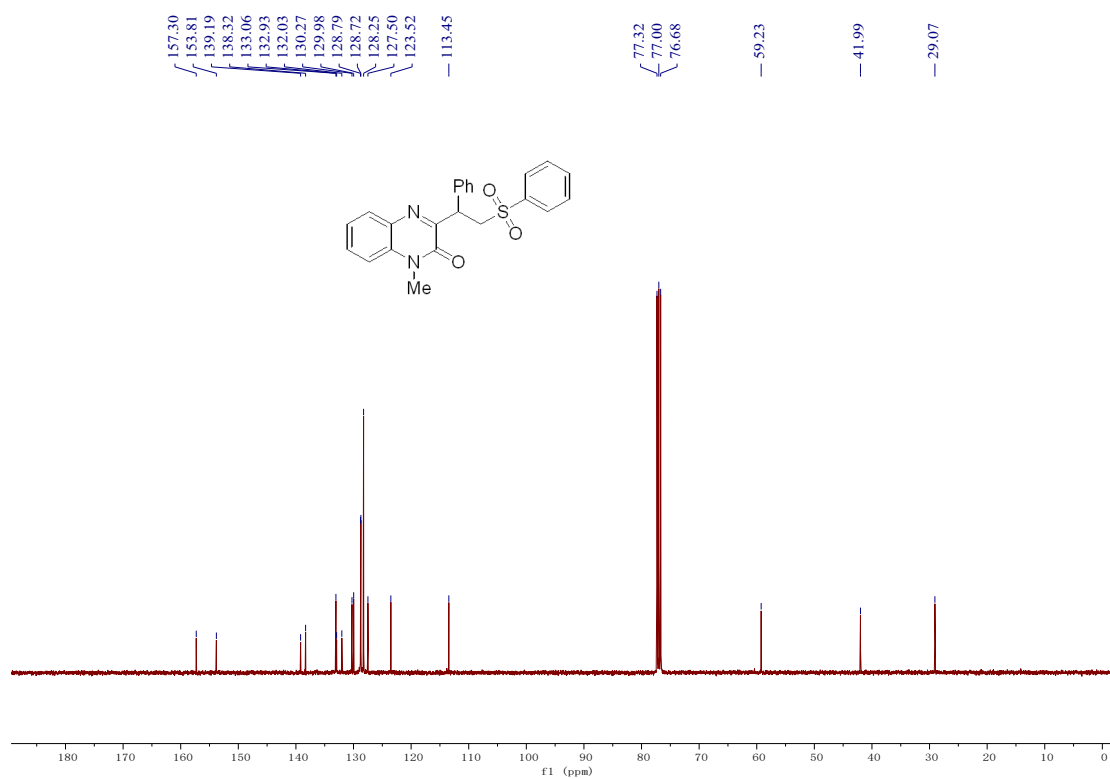

<sup>13</sup>C spectra of 5k

**3-(2-((4-methoxyphenyl)sulfonyl)-1-phenylethyl)-1-methylquinoxalin-2(1H)-one (51)**

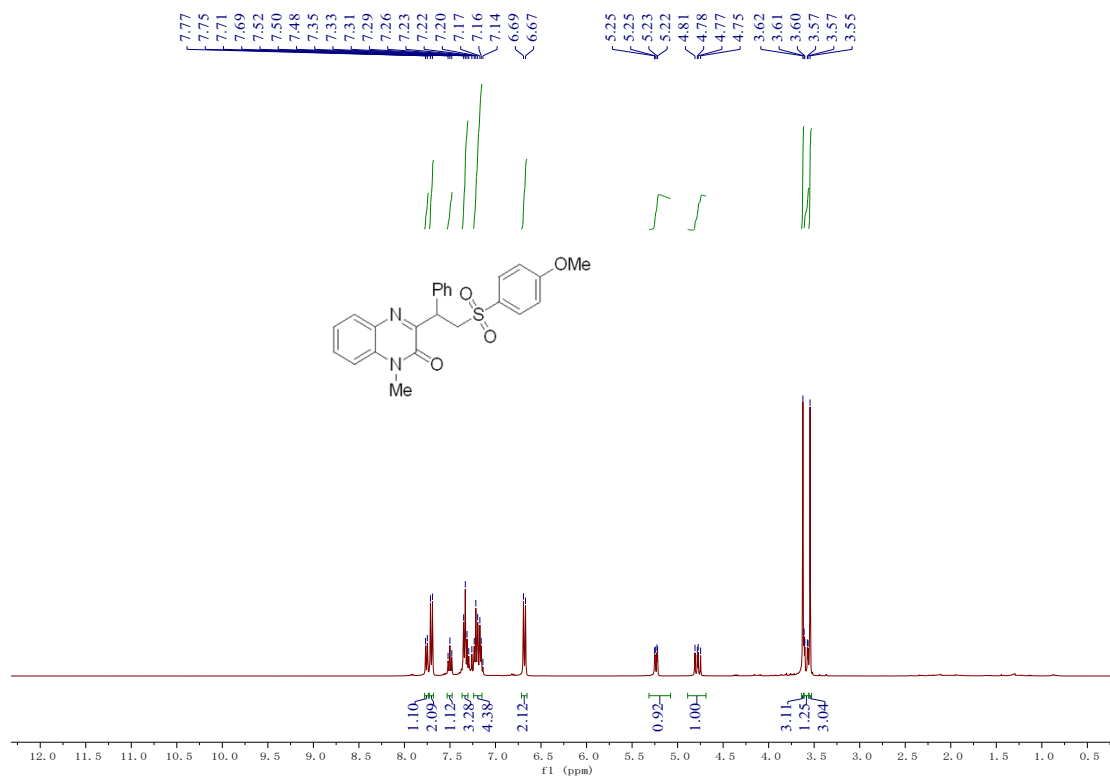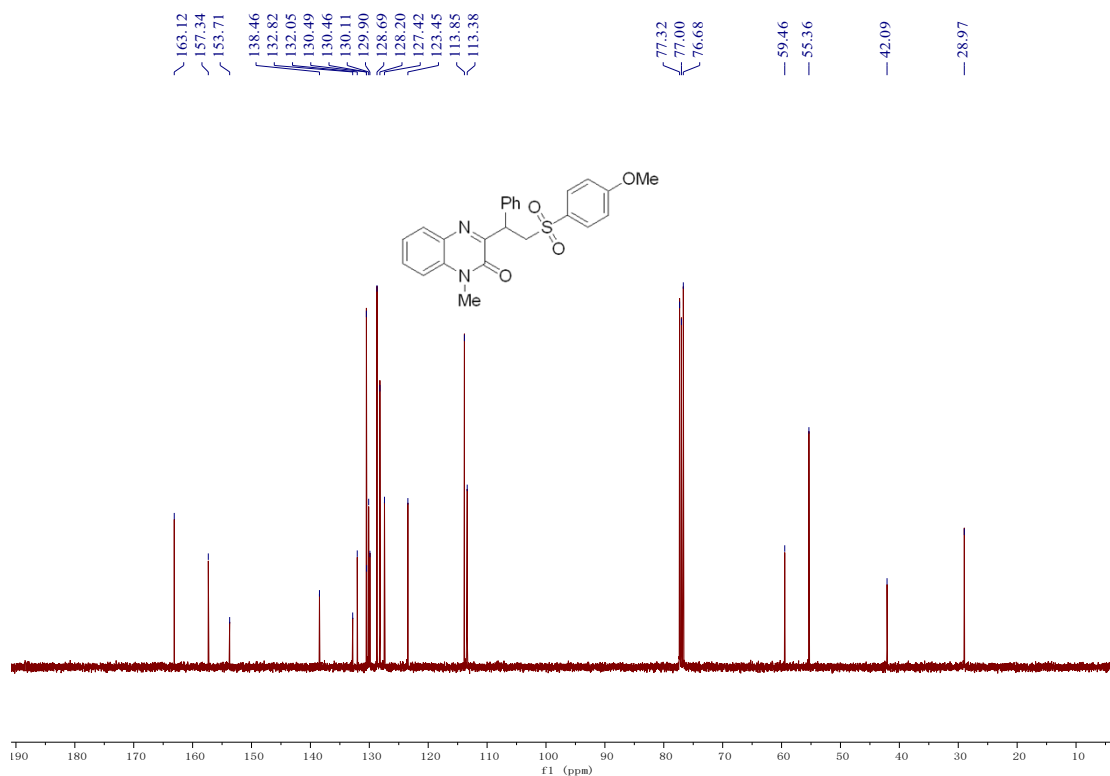

### 3-(2-((4-fluorophenyl)sulfonyl)-1-phenylethyl)-1-methylquinoxalin-2(1H)-one (5m)

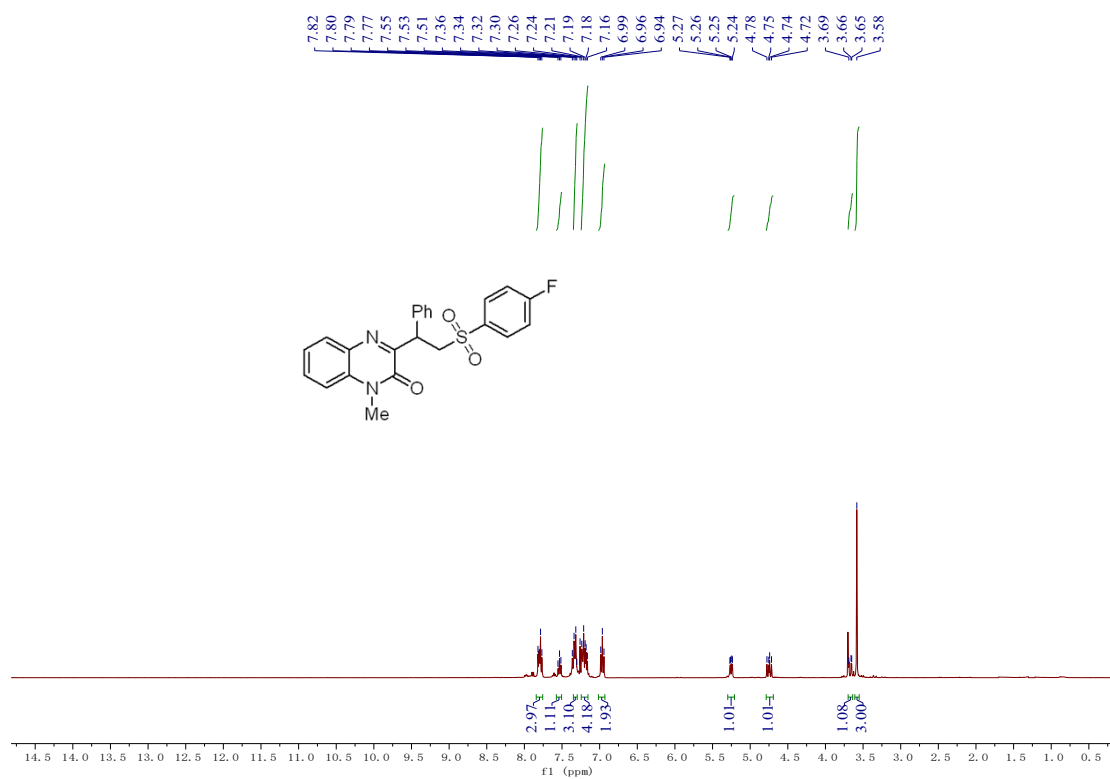

<sup>1</sup>H spectra of 5m

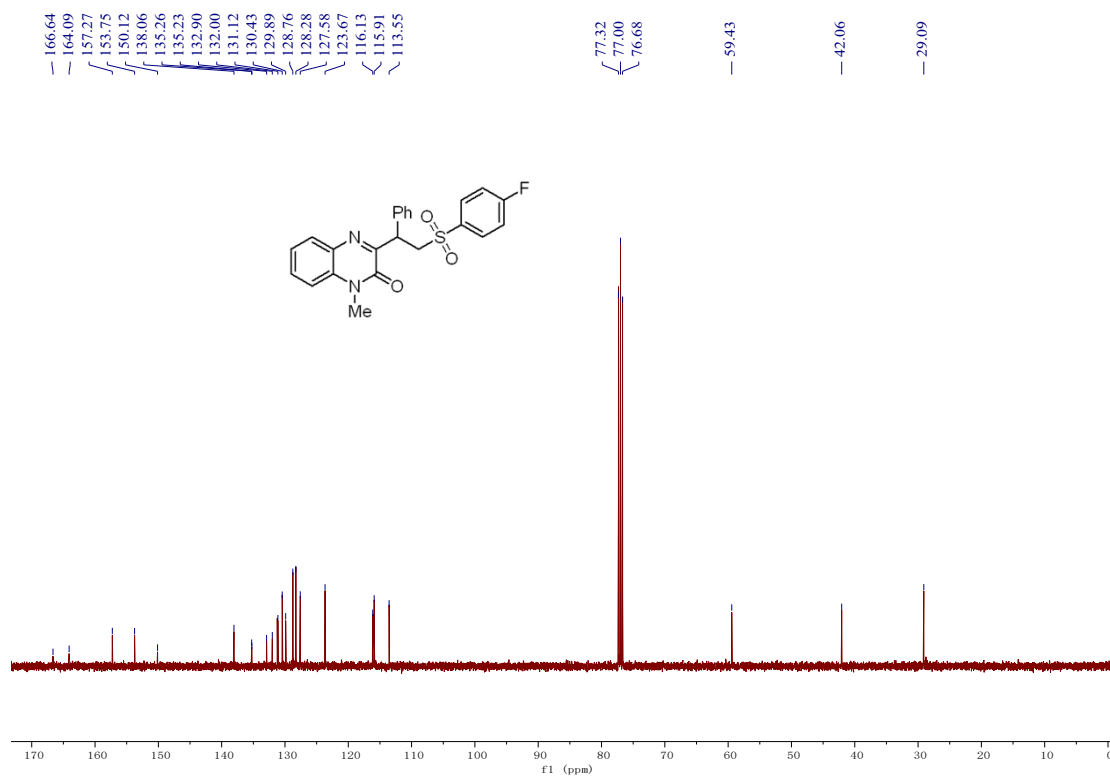

<sup>13</sup>C spectra of 5m

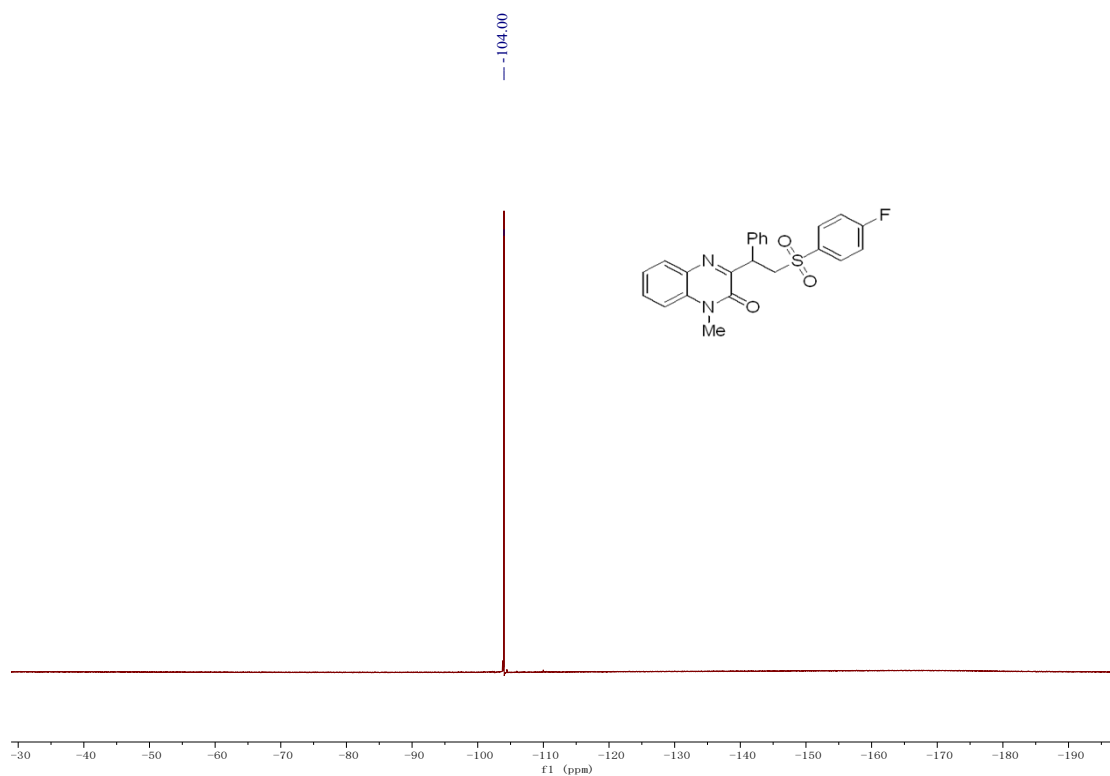

$^{19}\text{F}$  spectra of **5m**

**3-(2-((4-chlorophenyl)sulfonyl)-1-phenylethyl)-1-methylquinoxalin-2(1H)-one (5n)**

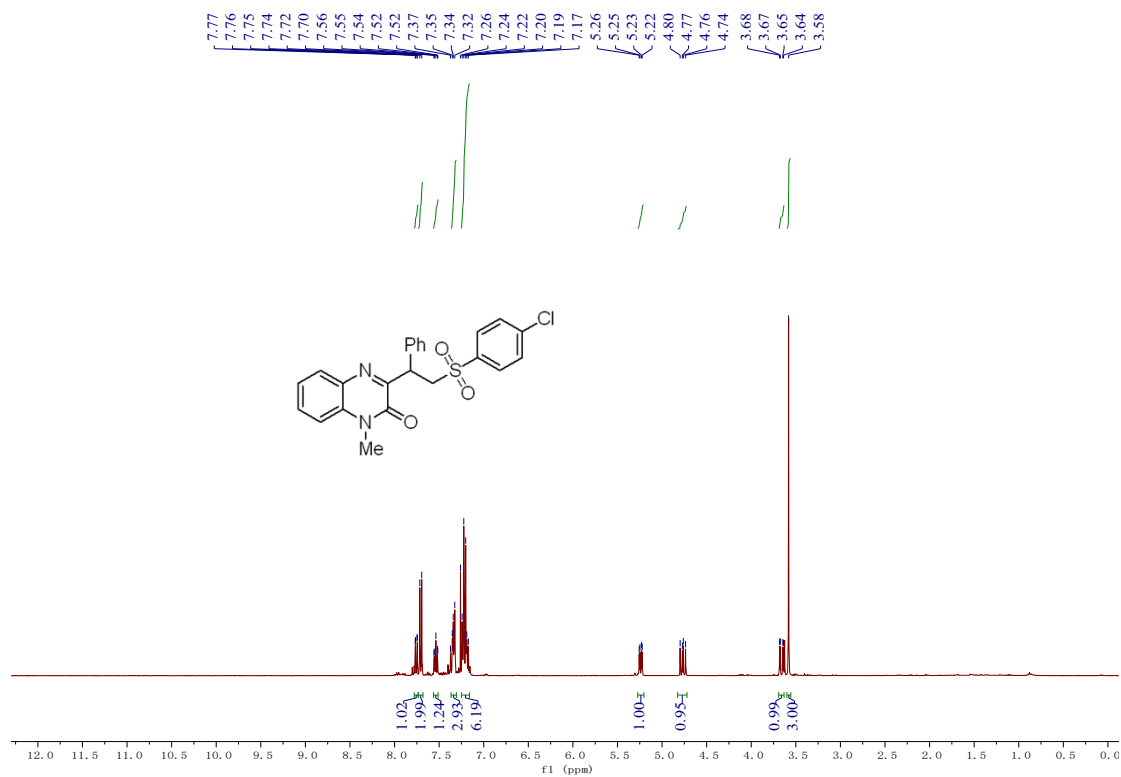

$^1\text{H}$  spectra of **5n**

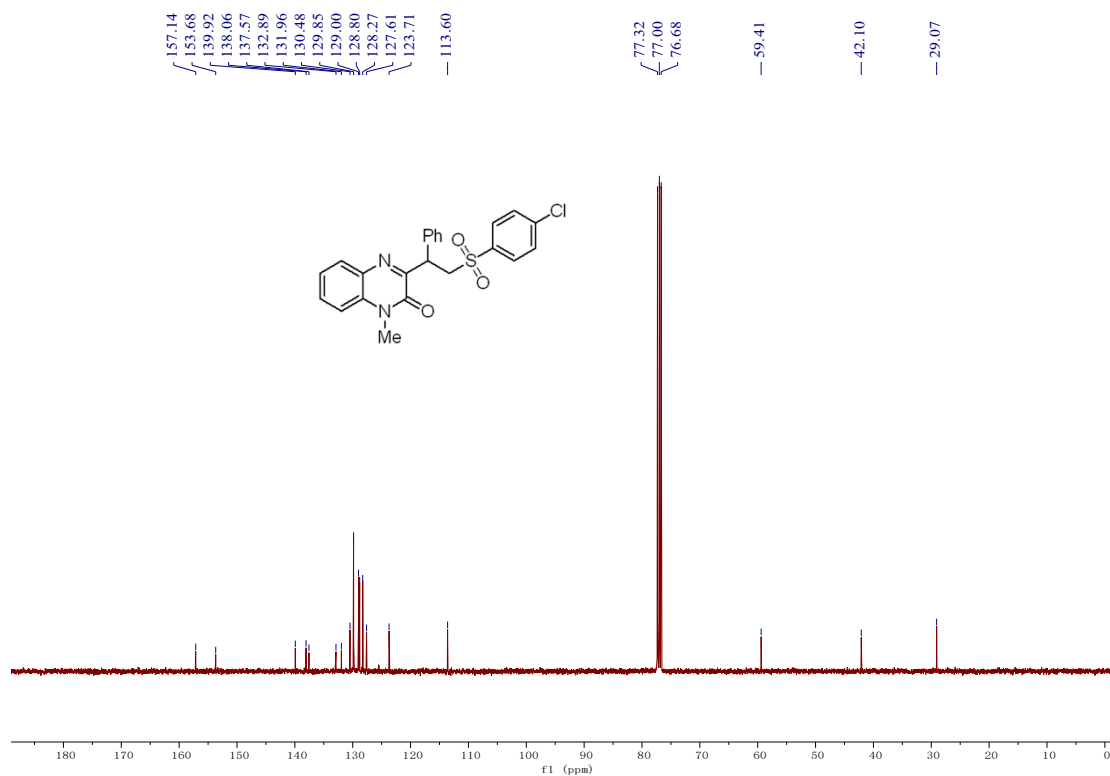

<sup>13</sup>C spectra of **5n**

**1-methyl-3-(1-phenyl-2-(o-tolylsulfonyl)ethyl)quinoxalin-2(1H)-one (5o)**

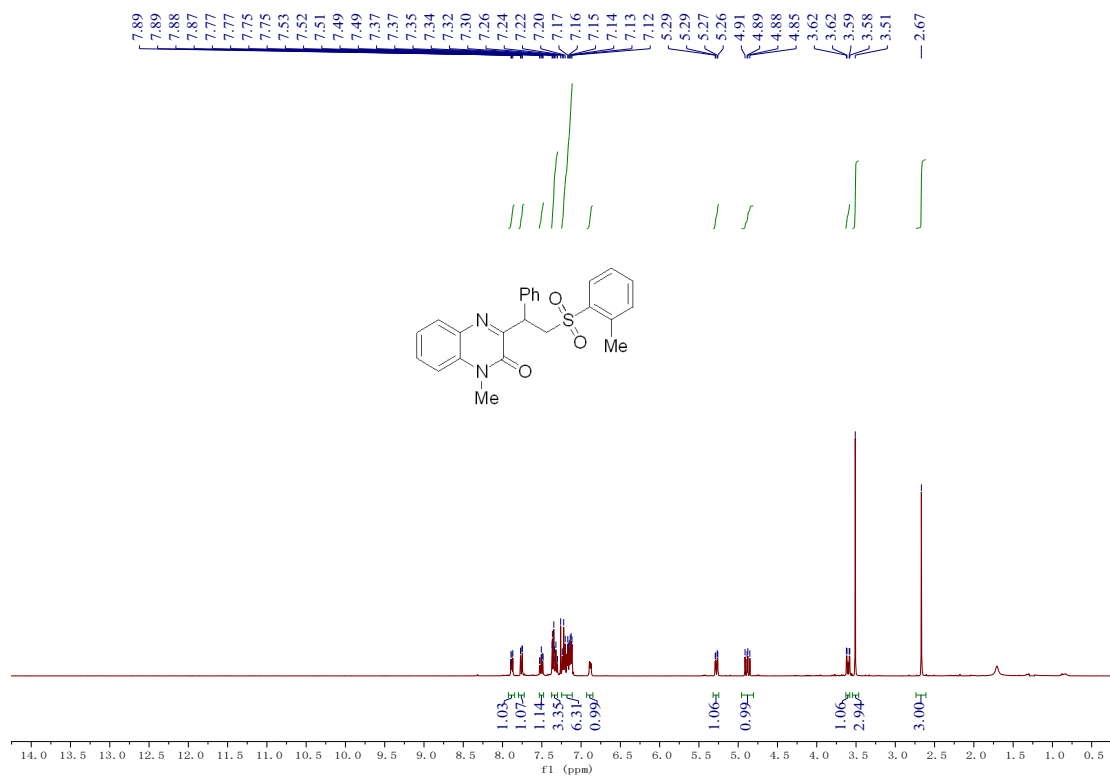

<sup>1</sup>H spectra of **5o**

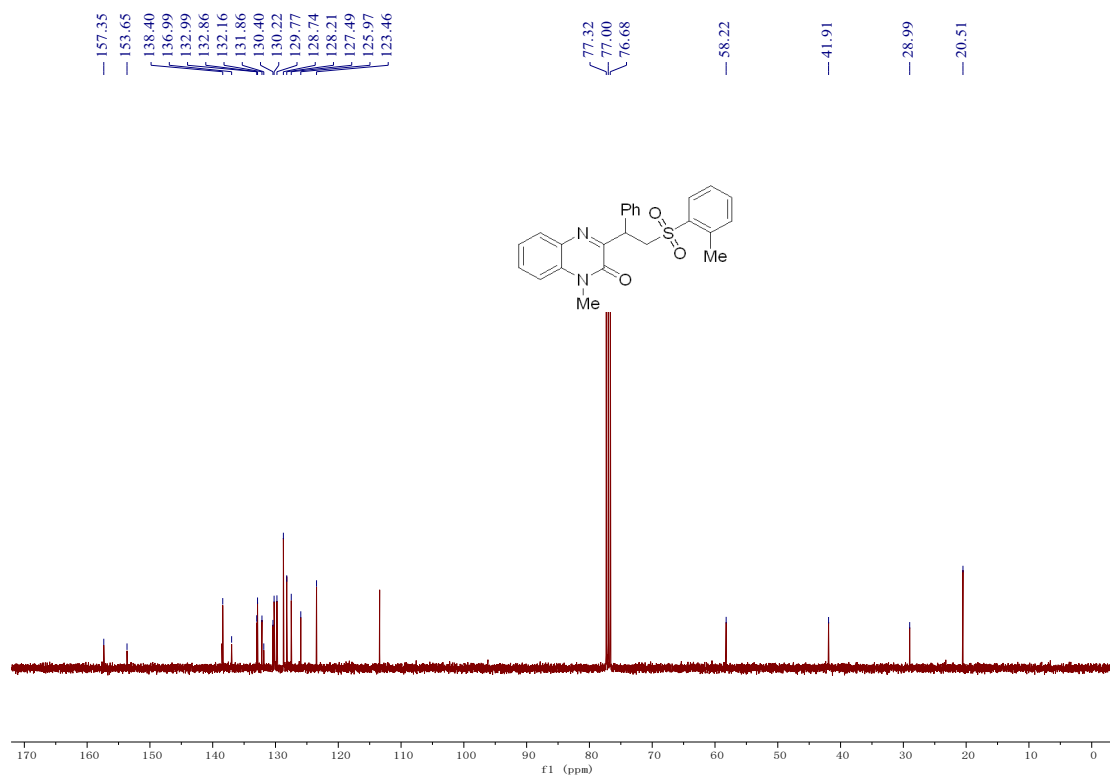

<sup>13</sup>C spectra of **5o**

**3-(2-((3-bromophenyl)sulfonyl)-1-phenylethyl)-1-methylquinoxalin-2(1H)-one (5p)**

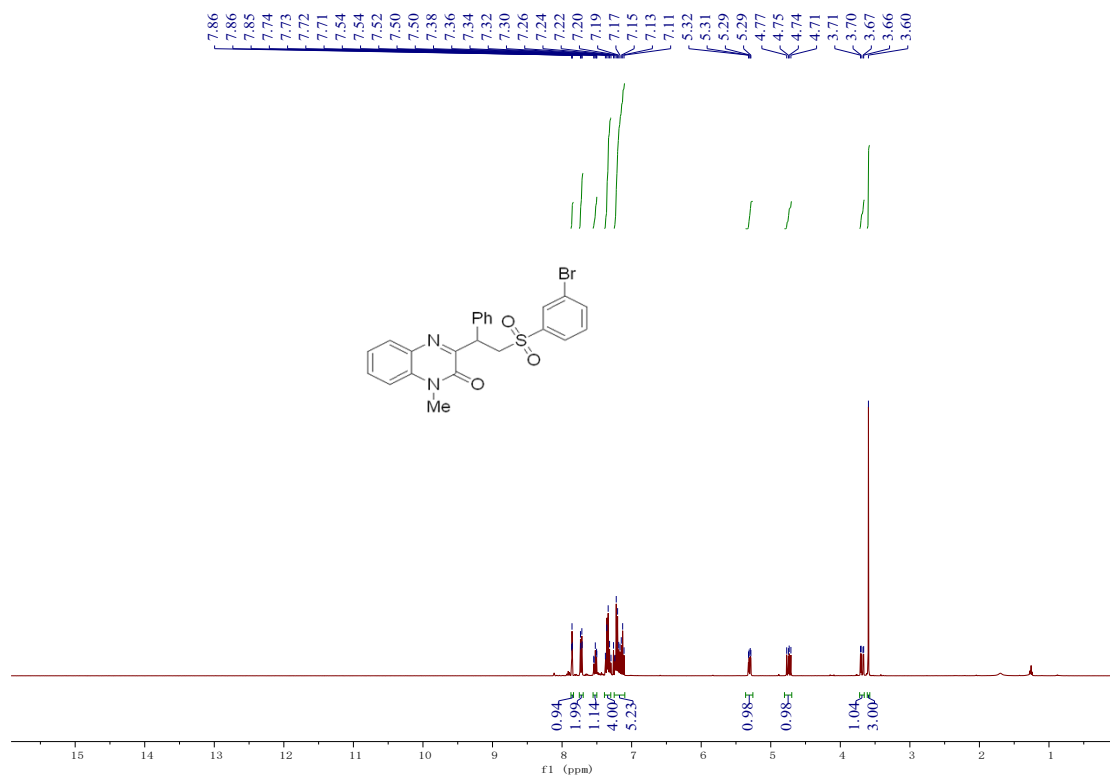

<sup>1</sup>H spectra of **5p**



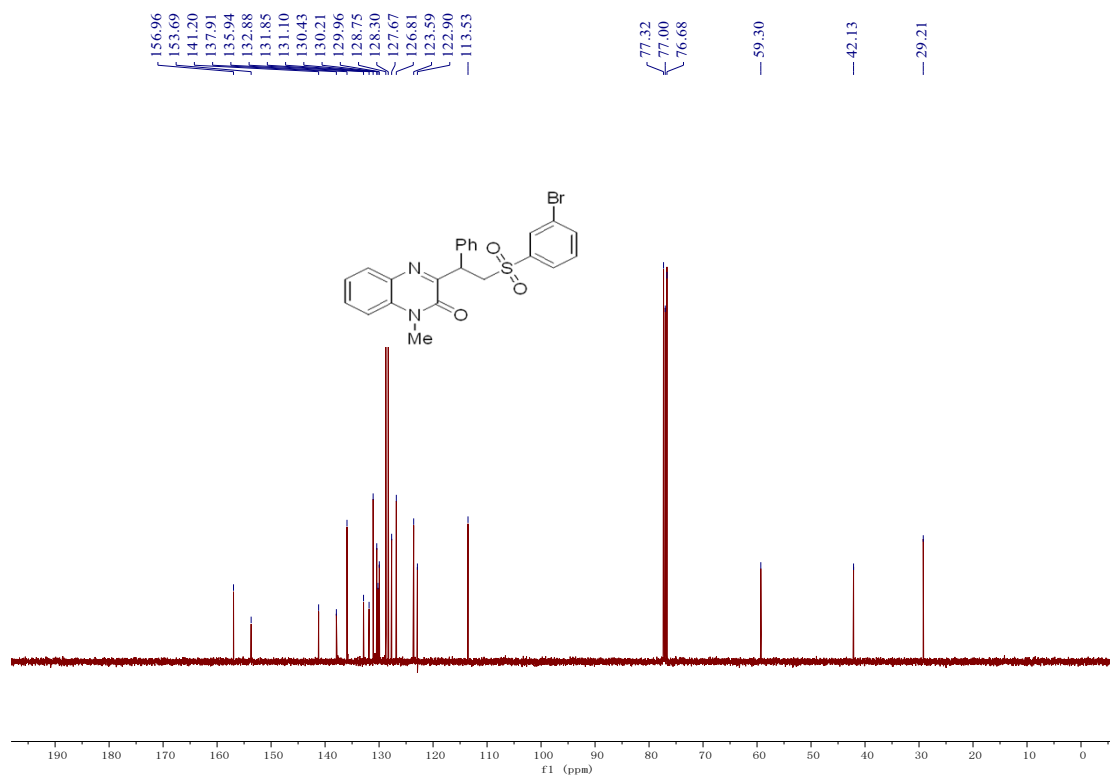

<sup>13</sup>C spectra of 5p

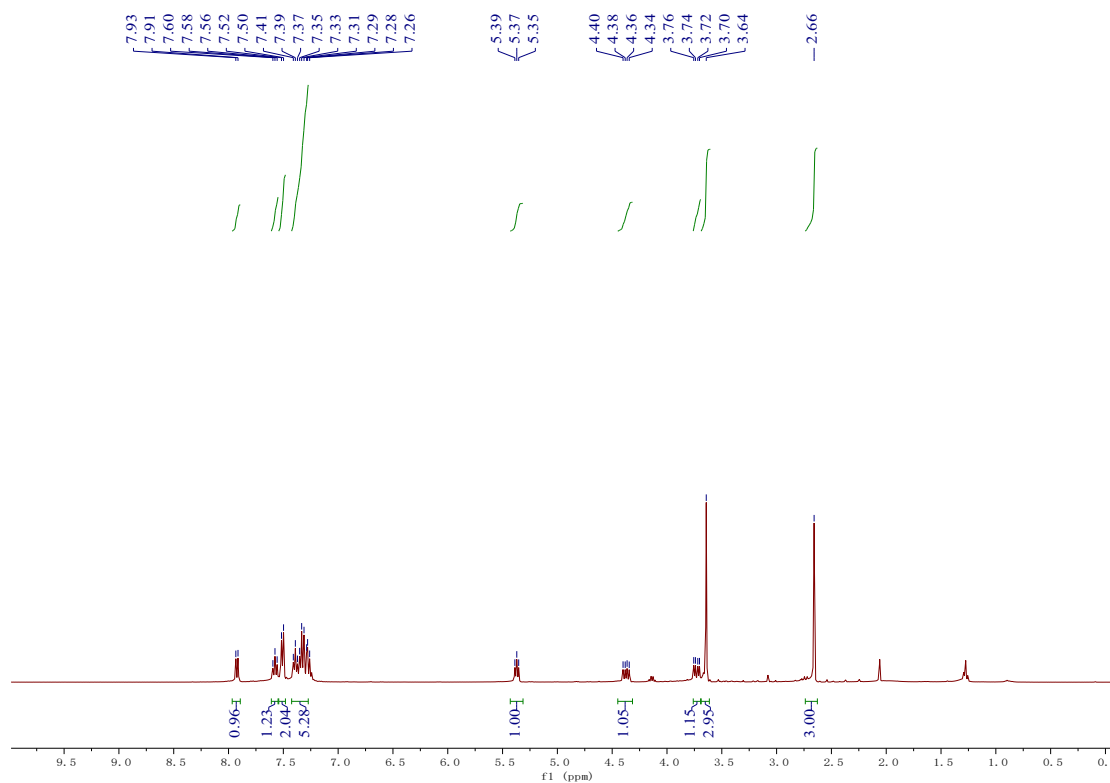

<sup>1</sup>H spectra of 5r

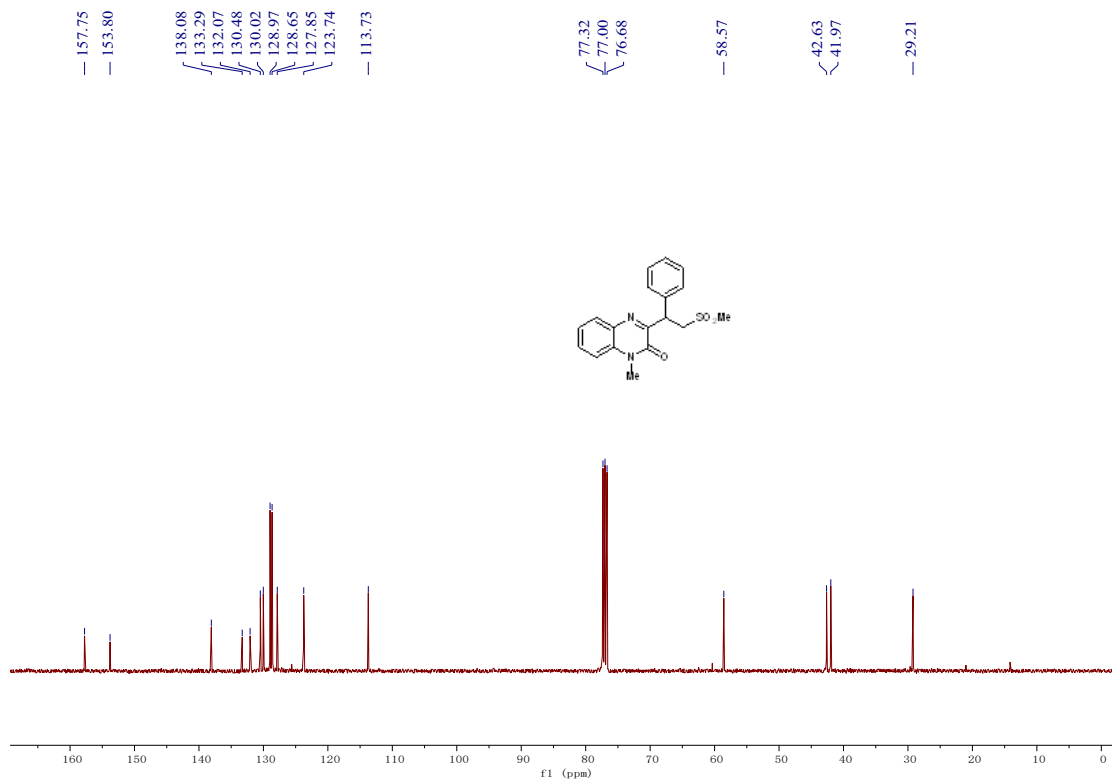

$^{13}\text{C}$  spectra of **5r**

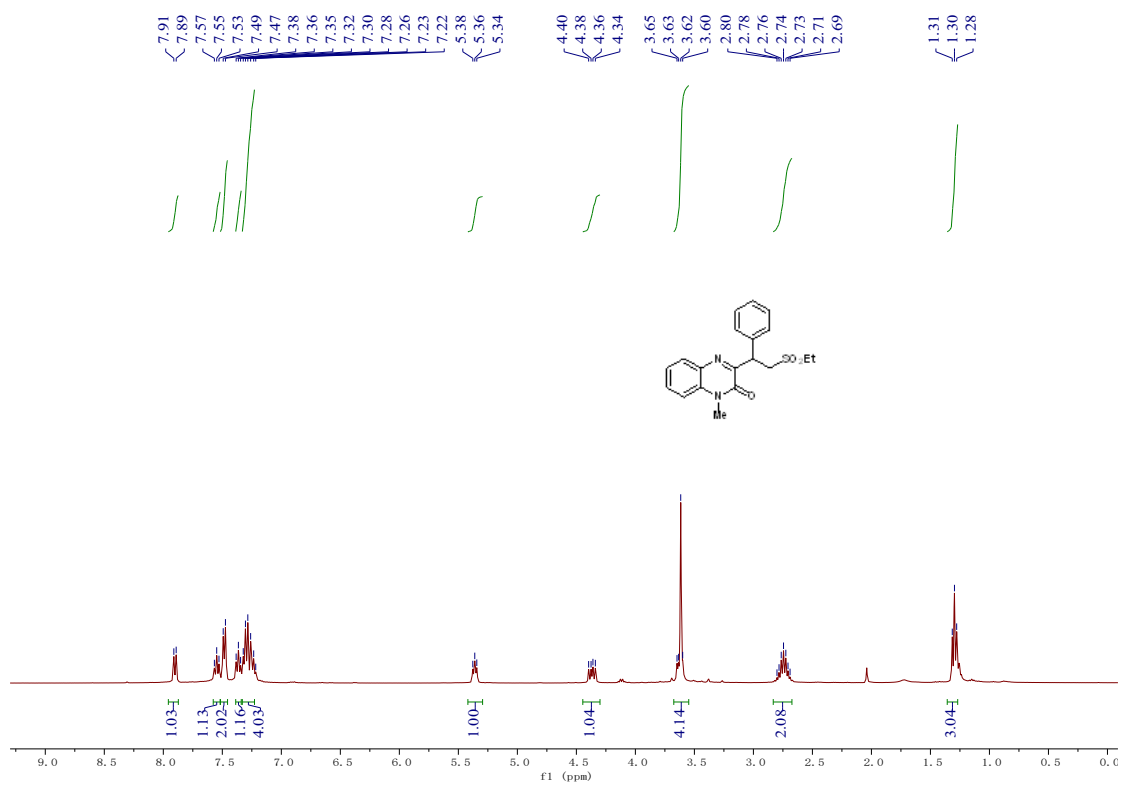

$^1\text{H}$  spectra of **5s**

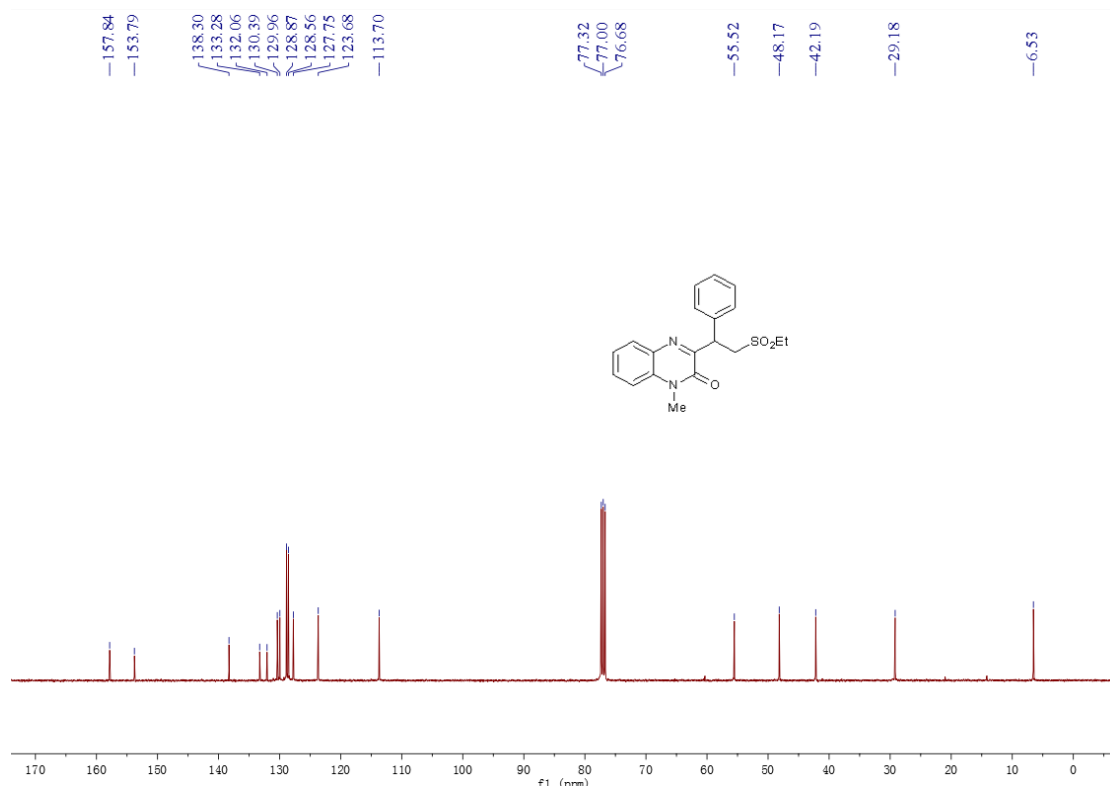

<sup>13</sup>C spectra of **5s**
